# Supplementary material for: Multiple statistical models reveal specific volatile organic compounds affect sex hormones in American adult male: NHANES 2013–2016
Source: Front Endocrinol (Lausanne). 2023 Jan 12;13:1076664. doi: 10.3389/fendo.2022.1076664 (PMC9877519; doi:10.3389/fendo.2022.1076664)
Supplement: Supplementary file 5 [file Table_1.xlsx]

## Sheet: Sheet1
Testosterone
Results of WQS index regression modeling for the association of blood VOCs with testosterone before adjustment
Outcome	WQS regression		Dominant components	Mean weight (%)
	b	P
Testosterone	61.797	9.03e-14	Blood Benzene	0.416435
			Blood 2,5-Dimethylfuran	0.200704
			Blood Toluene	0.113003
			Blood Ethylbenzene	0.11183
			Blood 1,4-Dichlorobenzene	0.0875533
			Blood m-/p- Xylene	0.0640331
			Blood Tetrachloroethene	0.00644098
Testosterone
Results of WQS index regression modeling for the association of blood VOCs with testosterone after adjustment
Outcome	WQS regression		Dominant components	Mean weight (%)
	b	P
Testosterone	28.7313	0.00242	Blood Benzene	0.464897
			Blood 2,5-Dimethylfuran	0.147811
			Blood Toluene	0.125264
			Blood Ethylbenzene	0.12369
			Blood 1,4-Dichlorobenzene	0.0992765
			Blood m-/p- Xylene	0.0330088
			Blood Tetrachloroethene	0.00605298
Estradiol
Results of WQS index regression modeling for the association of blood VOCs with estradiol before adjustment
Outcome	WQS regression		Dominant components	Mean weight (%)
	b	P
Estradiol	0.7032	0.443	Blood Benzene	0.629896
			Blood 1,4-Dichlorobenzene	0.197564
			Blood 2,5-Dimethylfuran	0.0844318
			Blood Toluene	0.0490626
			Blood Tetrachloroethene	0.0274844
			Blood Ethylbenzene	0.0114012
			Blood m-/p- Xylene	0.000160082
Estradiol
Results of WQS index regression modeling for the association of blood VOCs with estradiol after adjustment
Outcome	WQS regression		Dominant components	Mean weight (%)
	b	P
Estradiol	0.19715	0.75448	Blood Benzene	0.51962
			Blood 2,5-Dimethylfuran	0.258216
			Blood 1,4-Dichlorobenzene	0.102855
			Blood Toluene	0.0825387
			Blood Tetrachloroethene	0.018358
			Blood Ethylbenzene	0.0180578
			Blood m-/p- Xylene	0.000354254
SHBG
Results of WQS index regression modeling for the association of blood VOCs with SHBG before adjustment
Outcome	WQS regression		Dominant components	Mean weight (%)
	b	P
SHBG	5.3452	1.56e-06	Blood m-/p- Xylene	0.433694
			Blood Benzene	0.313195
			Blood Ethylbenzene	0.142409
			Blood Toluene	0.0782908
			Blood 1,4-Dichlorobenzene	0.0153714
			Blood 2,5-Dimethylfuran	0.00964041
			Blood Tetrachloroethene	0.00739943
SHBG
Results of WQS index regression modeling for the association of blood VOCs with SHBG after adjustment
Outcome	WQS regression		Dominant components	Mean weight (%)
	b	P
SHBG	4.26041	0.000105	Blood Benzene	0.342629
			Blood m-/p- Xylene	0.271978
			Blood Toluene	0.149824
			Blood Ethylbenzene	0.0972499
			Blood 2,5-Dimethylfuran	0.0818463
			Blood 1,4-Dichlorobenzene	0.0403196
			Blood Tetrachloroethene	0.0161534
