# Supplementary material for: Multiple statistical models reveal specific volatile organic compounds affect sex hormones in American adult male: NHANES 2013–2016
Source: Front Endocrinol (Lausanne). 2023 Jan 12;13:1076664. doi: 10.3389/fendo.2022.1076664 (PMC9877519; doi:10.3389/fendo.2022.1076664)
Supplement: Supplementary file 6 [file Table_2.xlsx]

## Sheet: male
SEQN	GENDR	AGE	RACE	EDU_Adults	MARTL	Ratio_Family_Income	BMI	Smoking	Drinking	Testosterone	Estradiol	SHBG	TT/E2	Blood 2,5-Dimethylfuran	Blood Tetrachloroethene	Blood Benzene	Blood 1,4-Dichlorobenzene	Blood Ethl Acetate	Blood Furan	Blood Toluene	Blood m-/p-Xylene	TVOCs
73558	1	54	3	3	1	1.78	28.6	1	1	175.45	14	29.16	12.5321	0.0078	0.0339	0.07	4.1	1.76	0.0177	0.189	0.144	6.3224
73559	1	72	3	4	1	4.51	28.9	1	1	447	26.5	54.6	16.8679	0.0078	0.0339	0.017	0.0283	0.1117	0.0177	0.083	0.148	0.4474
73562	1	56	1	4	3	4.79	41.7	1	1	206.57	22.3	28.49	9.26323	0.0078	0.0339	0.017	0.0283	0.1117	0.0177	0.098	0.024	0.3384
73567	1	65	3	2	2	1.2	22	1	1	483	26.4	118.2	18.2955	0.153	0.0339	0.194	0.0283	0.1117	0.074	0.57	0.25	1.4149
73589	1	35	3	3	3	1.74	26.2	2	1	516	25.9	35.98	19.9228	0.0078	0.0339	0.07	0.051	0.1117	0.0177	0.144	2.62	3.0561
73592	1	29	1	4	5	2.14	31	2	2	295	29.3	11.66	10.0683	0.0078	0.0339	0.017	0.0283	0.1117	0.0177	0.046	0.024	0.2864
73594	1	23	2	1	5	0.45	24.7	2	1	438	20.7	26.65	21.1594	0.0078	0.0339	0.017	0.0283	0.1117	0.0177	0.042	0.037	0.2954
73595	1	58	2	4	1	3.09	31.2	1	1	460.81	15	56.31	30.7207	0.0078	0.0339	0.017	0.0283	0.1117	0.0177	0.068	0.024	0.3084
73600	1	37	4	3	3	0.63	36.8	1	1	334	29.5	28.53	11.322	0.195	0.0339	0.357	0.128	0.1117	0.12	0.939	0.338	2.2226
73607	1	75	3	3	1	1.08	38.9	1	1	164	16.5	39.95	9.93939	0.0078	0.148	0.017	2.08	0.1117	0.0177	0.038	0.024	2.4442
73621	1	80	3	5	1	5	24.6	1	1	109	10.7	97.6	10.1869	0.0078	0.0339	0.017	0.102	0.1117	0.0177	0.067	0.073	0.4301
73622	1	72	3	5	1	5	28.9	2	1	338.26	29	42.8	11.6641	0.0078	0.099	0.017	0.479	0.1117	0.0177	0.029	0.024	0.7852
73632	1	23	1	1	1	2.48	31.7	2	1	207	24.5	16.39	8.44898	0.0078	0.0794	0.017	0.06	0.1117	0.0177	0.03	0.024	0.3476
73654	1	46	3	1	5	1	36.2	2	2	170	25.9	25.46	6.56371	0.0078	0.0339	0.017	0.195	0.4074	0.0177	0.0177	0.024	0.7205
73656	1	54	3	5	1	4.25	28	2	1	314.75	21.6	28.18	14.5718	0.0078	0.0794	0.194	0.0283	0.1117	0.0177	0.065	0.04	0.5439
73662	1	39	3	4	5	0.61	23.4	1	1	547	22.5	76.91	24.3111	0.281	0.0339	0.58	0.0283	21.8	0.099	1.27	0.365	24.4572
73666	1	70	5	5	1	3.81	26.3	1	1	207	14.1	29.91	14.6809	0.0078	0.0339	0.017	0.0283	0.1117	0.0177	0.036	0.024	0.2764
73667	1	24	3	4	6	0.65	29.1	1	1	500.67	17.4	42.99	28.7741	0.107	0.0339	0.181	0.363	0.1117	0.071	0.489	0.192	1.5486
73672	1	73	3	4	1	5	27	1	1	568	28	67.15	20.2857	0.0078	0.099	0.04	0.0283	0.1117	0.0177	0.607	0.482	1.3935
73676	1	44	3	4	1	2.73	37.6	1	1	285	20.3	21.94	14.0394	0.0078	0.0339	0.017	0.0283	0.1117	0.0177	0.085	0.057	0.3584
73678	1	51	3	2	1	1.02	33.7	1	1	231	26.4	15.74	8.75	0.0078	0.0339	0.017	0.0283	0.1117	0.0177	0.031	0.034	0.2814
73692	1	65	2	3	1	1.61	23.8	2	1	256.79	14.8	48.4	17.3507	0.0078	0.171	0.017	0.044	0.1117	0.0177	0.041	0.024	0.4342
73698	1	23	3	4	6	2.74	29.1	1	1	356	23.6	33.57	15.0847	0.087	0.0339	0.136	0.089	0.1117	0.048	0.361	0.159	1.0256
73701	1	47	5	5	1	4.19	24.6	1	1	348	23.7	30.53	14.6835	0.0078	0.0339	0.017	1.6	0.1117	0.0177	0.039	0.024	1.8511
73706	1	54	3	4	1	1.44	30.8	1	1	397	29.5	31.52	13.4576	0.156	0.0339	0.265	0.224	0.1117	0.094	0.687	0.245	1.8166
73709	1	64	4	3	1	2	30.9	2	1	344.66	26.5	37.25	13.006	0.0078	0.0339	0.017	4.1	0.1117	0.0177	0.089	0.024	4.4011
73716	1	25	3	5	5	4.35	26.3	2	1	423	18.1	36.38	23.3702	0.0078	0.0339	0.017	0.177	0.1117	0.0177	0.136	0.037	0.5381
73720	1	48	4	3	1	3.03	40.9	2	1	283	27.7	29.99	10.2166	0.0078	0.0339	0.017	0.1	0.1117	0.0177	0.033	0.024	0.3451
73724	1	26	4	4	5	2.4558	19.2	2	1	1120	37	103.5	30.2703	0.0078	0.0339	0.032	0.0283	0.1117	0.0177	0.15	0.054	0.4354
73738	1	29	4	5	5	5	44.5	2	1	275	25.1	26.94	10.9562	0.0078	0.0794	0.017	0.181	0.1117	0.0177	0.031	0.024	0.4696
73755	1	75	1	2	2	1.63	22.8	1	2	444	27.7	54.29	16.0289	0.0078	0.0339	0.017	1.75	0.1117	0.0177	0.054	0.044	2.0361
73765	1	54	1	4	1	0.64	22.2	1	1	401	10.4	43.37	38.5577	0.117	0.0339	0.342	0.0283	0.1117	0.106	0.827	0.367	1.9329
73779	1	62	3	3	3	0.04	18.1	1	1	284	25.9	123.2	10.9653	0.115	0.0339	0.382	0.0283	0.1117	0.11	0.862	0.312	1.9549
73780	1	78	3	5	1	2.4558	24.1	2	1	490	17.8	67.06	27.5281	0.0078	0.0339	0.017	0.0283	0.1117	0.0177	0.029	0.024	0.2694
73783	1	26	3	5	5	4.67	24.9	1	1	590	24.8	22.31	23.7903	0.0078	2.89	0.05	0.0283	0.1117	0.0177	0.077	0.065	3.2475
73790	1	59	3	5	5	3.08	30.2	1	1	246	18.8	48.75	13.0851	0.0078	0.0339	0.017	0.0283	0.1117	0.0177	0.062	0.087	0.3654
73804	1	55	1	1	1	0.87	30.8	1	1	185	26.8	17.4	6.90299	0.0078	0.0339	0.017	0.046	0.1117	0.0177	0.333	0.168	0.7351
73820	1	56	3	3	1	3.2	28.6	2	1	395.07	32.4	28.1	12.1935	0.0078	0.0339	0.1012	0.0283	0.1117	0.0177	0.05	0.045	0.3956
73834	1	64	5	5	5	2.4558	22.2	2	1	384	33.4	39.02	11.497	0.0078	0.0339	0.017	0.108	0.1117	0.0177	0.055	0.049	0.4001
73847	1	34	3	2	6	1.13	29.6	1	1	360	19.7	31.44	18.2741	0.0078	0.0339	0.017	0.0283	0.4074	0.0177	0.043	0.024	0.5791
73850	1	30	3	3	1	0.67	22.8	1	1	393	24.7	36.08	15.9109	0.112	0.0339	0.266	0.0283	0.1117	0.099	2.12	0.295	3.0659
73858	1	52	4	3	3	1.14	26.6	1	1	511	25.8	51.57	19.8062	0.0078	0.05	0.017	0.0283	0.1117	0.0177	0.096	0.036	0.3645
73859	1	38	4	4	1	3.81	31.5	1	1	323	28	18.3	11.5357	0.082	0.0339	0.114	0.628	0.1117	0.04	0.358	0.228	1.5956
73861	1	77	3	5	1	5	34.7	2	1	312	19.4	55.03	16.0825	0.0078	0.0339	0.017	0.0283	0.1117	0.0177	0.085	0.055	0.3564
73865	1	48	3	3	3	1.04	20.9	1	1	488	16.1	57.99	30.3106	0.271	0.0339	0.65	0.277	0.1117	0.202	1.8	4.08	7.4256
73870	1	38	3	5	5	5	30.3	2	1	294	20.7	20.8	14.2029	0.0078	0.0794	0.1012	0.043	0.1117	0.0177	0.296	0.044	0.7008
73899	1	57	4	5	1	5	42.3	2	1	316	95.1	26.16	3.32282	0.0078	0.0794	0.017	0.157	0.1117	0.0177	0.052	0.024	0.4666
73900	1	66	3	5	1	5	26.6	1	1	258	26.9	57.32	9.59108	0.0078	0.0339	0.017	0.0283	0.1117	0.0177	0.077	0.057	0.3504
73916	1	27	3	4	5	0.97	32.4	1	1	445	18.1	23.19	24.5856	0.0078	0.0339	0.017	0.0283	0.1117	0.0177	0.057	0.103	0.3764
73918	1	32	4	2	5	0.76	23.2	1	1	538	18.5	34.46	29.0811	0.117	0.0339	0.168	21.3	0.1117	0.07	0.462	0.188	22.4506
73932	1	30	3	3	1	0.51	26.4	1	1	275.61	23	14.98	11.983	0.064	0.0794	0.09	0.0283	0.1117	0.037	0.276	0.084	0.7704
73934	1	31	4	3	5	1.42	29.7	2	1	444.89	28.5	36.73	15.6102	0.0078	0.0339	0.017	0.107	0.1117	0.0177	0.056	0.024	0.3751
73935	1	63	2	4	1	2.4558	24.2	1	1	529	17.5	59.8	30.2286	0.1	0.0339	0.25	0.088	0.1117	0.061	0.515	0.238	1.3976
73945	1	66	3	4	3	1.74	37.6	1	1	337.24	16.2	61.4	20.8173	0.0078	0.0339	0.017	0.105	0.1117	0.0177	0.142	0.088	0.5231
73952	1	42	1	4	5	0.17	39.2	1	1	372	25.7	31.51	14.4747	0.0078	0.0339	0.017	0.0283	0.1117	0.0177	0.072	0.075	0.3634
73962	1	49	4	3	1	1.37	31.9	1	1	584.41	20.1	65.94	29.0751	0.0078	0.0794	0.017	0.082	0.1117	0.0177	0.159	0.054	0.5286
73974	1	34	1	5	1	3.45	31.2	2	1	379.18	30	28.29	12.6393	0.0078	0.0339	0.017	0.488	0.1117	0.0177	0.045	0.024	0.7451
73980	1	43	2	1	6	2.4558	22	1	2	511	22.7	40.07	22.511	0.0078	0.0339	0.036	0.0283	0.1117	0.0177	0.296	0.211	0.7424
73992	1	20	3	4	5	1.04	18.4	2	2	651	33.1	42.13	19.6677	0.0078	0.0339	0.017	0.0283	0.1117	0.0177	0.059	0.024	0.2994
73993	1	57	3	4	3	0.64	26.7	1	1	336.63	18.2	43.43	18.4962	0.278	0.0339	0.1012	0.121	0.1117	0.107	0.959	0.296	2.0078
73994	1	36	5	3	1	2.15	26.8	1	1	305	25.5	29.04	11.9608	0.0078	0.0794	0.017	0.0283	0.1117	0.0177	0.0177	0.024	0.3036
74001	1	48	4	4	1	0.86	42.4	1	1	293	30.2	28.26	9.70199	0.17	0.0339	0.384	0.0283	0.1117	0.091	0.872	0.355	2.0459
74002	1	63	4	2	1	4.04	39	1	1	302	34.8	43.26	8.67816	0.0078	0.0339	0.017	0.0283	0.1117	0.0177	0.04	0.036	0.2924
74010	1	40	3	3	1	1.61	28.9	2	2	398	26.6	39.23	14.9624	0.0078	0.0339	0.017	0.0283	0.1117	0.0177	0.074	0.045	0.3354
74025	1	45	3	4	3	1.63	27.7	1	1	657	19.9	74.24	33.0151	0.181	0.0339	0.287	0.0283	0.1117	0.115	0.751	0.3	1.8079
74029	1	22	4	4	5	3	25.2	2	1	455	23	30.11	19.7826	0.0078	0.0339	0.017	0.075	0.1117	0.0177	0.027	0.024	0.3141
74033	1	80	3	5	2	5	24.2	2	1	393	23.8	62.42	16.5126	0.0078	0.0339	0.017	0.0283	0.1117	0.0177	0.086	0.071	0.3734
74037	1	20	1	4	5	0.89	21.3	2	2	342	20	20.78	17.1	0.0078	0.0339	0.017	0.258	0.1117	0.0177	0.032	0.024	0.5021
74041	1	60	1	3	2	2.4558	27.4	1	1	237	15.8	57.42	15	0.0078	0.0339	0.017	0.062	0.1117	0.0177	0.08	0.086	0.4161
74044	1	73	3	3	5	0.86	18	1	1	1260	71.1	184.7	17.7215	0.065	0.0794	0.155	0.0283	0.1117	0.0177	3.9	0.137	4.4941
74048	1	80	3	3	1	1.78	26.4	1	2	339	21.8	42.42	15.5505	0.0078	0.0339	0.017	0.0283	0.1117	0.0177	0.092	0.061	0.3694
74056	1	38	2	2	1	0.56	29.9	2	1	616	30.8	45.12	20	0.0078	0.0339	0.017	0.8817	0.1117	0.0177	0.055	0.056	1.1808
74059	1	57	3	5	1	5	28.2	2	1	327	20.6	39.52	15.8738	0.0078	0.0339	0.017	0.0283	0.1117	0.0177	0.038	0.024	0.2784
74072	1	63	4	4	4	1.29	24.3	1	1	474	29	46.14	16.3448	0.093	0.0339	0.17	0.259	0.1117	0.03	0.46	0.151	1.3086
74075	1	59	4	2	5	0.43	38.6	1	1	362	25.1	40.05	14.4223	0.022	0.0339	0.182	0.092	0.1117	0.0177	0.19	0.099	0.7483
74077	1	26	3	2	5	2.02	27.3	1	1	577	41.8	42.07	13.8038	0.074	0.0339	0.106	1.33	0.1117	0.043	0.307	0.161	2.1666
74099	1	44	1	3	1	0.82	28.7	1	1	613	27.9	42.41	21.9713	0.0078	0.0339	0.017	0.0283	0.1117	0.0177	0.209	0.125	0.5504
74110	1	60	2	3	1	1.12	24.3	1	1	573	19.8	55.72	28.9394	0.0078	0.066	0.017	0.0283	0.1117	0.0177	0.059	0.064	0.3715
74115	1	27	1	1	6	0.64	25.3	1	1	271	13.9	27.59	19.4964	0.033	0.0339	0.049	0.0283	0.1117	0.0177	0.18	0.074	0.5276
74142	1	61	4	2	1	1.92	40.4	2	2	312	21.15	57.09	14.7518	0.0078	0.0339	0.017	0.067	0.1117	0.0177	0.056	0.049	0.3601
74144	1	51	1	1	1	3.79	31.1	1	1	636	21.3	80.28	29.8592	0.0078	0.0339	0.017	0.0283	0.1117	0.0177	0.067	0.055	0.3384
74146	1	50	4	1	1	0.57	23.9	2	1	375	16.2	48.33	23.1481	0.077	0.0339	0.327	0.06	0.1117	0.105	0.646	0.158	1.5186
74169	1	22	4	2	5	2.53	35.6	1	2	492	25.1	17.88	19.6016	0.027	0.0339	0.081	0.301	0.1117	0.026	0.184	0.079	0.8436
74170	1	56	4	5	1	5	31.6	2	1	415	37.6	49.21	11.0372	0.0078	0.064	0.017	0.073	0.1117	0.0177	0.049	0.06	0.4002
74181	1	38	3	2	5	1.48	35.3	1	1	418.59	19.7	45.42	21.2482	0.138	0.0794	0.208	0.055	0.1117	0.075	0.549	0.137	1.3531
74219	1	74	5	5	1	5	21.9	1	1	285	15	84.07	19	0.0078	0.0339	0.017	0.107	0.1117	0.0177	0.036	0.024	0.3551
74222	1	45	3	2	6	1.63	23.8	1	1	710	29.1	51.94	24.3986	0.042	0.0339	0.091	0.0283	0.1117	0.033	0.525	0.091	0.9559
74230	1	44	1	1	1	3.07	28.9	1	1	640	25.2	27.57	25.3968	0.047	0.0339	0.077	0.0283	0.1117	0.0177	0.281	0.152	0.7486
74241	1	72	3	4	1	3.22	29.6	1	1	482.4	28.9	46.13	16.692	0.0078	0.0339	0.017	0.202	0.1117	0.0177	0.191	0.138	0.7191
74247	1	74	3	3	1	4.77	21.1	1	1	443	28.3	98.98	15.6537	0.0078	0.0339	0.017	0.053	0.1117	0.0177	0.025	0.024	0.2901
74253	1	77	4	3	1	1.93	23.6	1	1	212	8.49	34.02	24.9706	0.0078	0.0339	0.075	2.9	0.1117	0.0177	0.057	0.024	3.2271
74287	1	60	4	3	3	3.74	36.2	2	1	337	38.3	26.44	8.79896	0.0078	0.0339	0.017	0.0283	0.1117	0.0177	0.076	0.055	0.3474
74296	1	26	3	4	5	5	25.9	1	1	453	14.8	27.02	30.6081	0.31	0.0339	0.356	0.051	0.1117	0.194	1.02	0.552	2.6286
74300	1	46	4	5	1	5	30	2	1	399	23.7	38.34	16.8354	0.0078	0.091	0.017	0.062	0.1117	0.0177	0.062	0.057	0.4262
74314	1	50	5	5	1	3.63	26.1	2	1	392	23.4	53.84	16.7521	0.0078	0.0339	0.017	0.166	0.1117	0.0177	0.22	0.115	0.6891
74317	1	33	3	5	1	2.73	24.4	2	2	438	21.8	42.03	20.0917	0.0078	0.0339	0.017	0.094	0.1117	0.0177	0.062	0.024	0.3681
74328	1	44	2	1	1	2.52	28.5	2	2	468	33	29.96	14.1818	0.0078	0.0794	0.017	0.0283	0.1117	0.0177	0.118	0.125	0.5049
74329	1	46	5	1	3	2.4558	21.7	1	1	593	21	58.02	28.2381	0.0078	0.0339	0.017	0.324	0.1117	0.0177	0.033	0.024	0.5691
74340	1	41	3	5	1	5	25.8	1	1	658	14.7	56.66	44.7619	0.167	0.0339	0.253	0.0283	0.1117	0.062	0.65	0.25	1.5559
74345	1	56	3	5	1	3.14	27.2	2	1	269	21.4	37.17	12.5701	0.0078	0.0794	0.017	0.0283	0.1117	0.0177	0.03	0.024	0.3159
74350	1	52	3	3	1	2.4558	30.2	1	1	463	18.57	57.1	24.9327	0.245	0.0339	0.338	0.0283	0.1117	0.155	0.878	0.349	2.1389
74355	1	61	3	4	1	2.4558	27.6	2	1	160	12.3	37.08	13.0081	0.0078	0.0339	0.017	0.0283	0.1117	0.0177	0.237	1.17	1.6234
74359	1	63	4	5	1	4.13	22.3	1	1	461	21.5	66.53	21.4419	0.203	0.0339	0.386	0.0283	7.67	0.075	0.814	0.323	9.5332
74367	1	74	3	1	5	2.4558	26.4	1	1	707	27.8	142.8	25.4317	0.016	0.0339	0.034	0.0283	0.1117	0.0177	0.086	0.024	0.3516
74376	1	21	4	4	5	0.77	24.3	2	2	455	47.6	20.28	9.55882	0.0078	0.0339	0.017	1.55	0.1117	0.0177	0.06	0.046	1.8441
74383	1	64	2	4	3	4.19	29.7	2	1	323	23.9	38.4	13.5146	0.0078	0.0339	0.017	0.0283	0.1117	0.0177	0.066	0.024	0.3064
74386	1	24	5	5	1	2.58	25.9	2	1	811	37	65.03	21.9189	0.0078	0.0794	0.1012	0.464	0.1117	0.0177	0.296	0.052	1.1298
74393	1	26	4	4	5	1.09	25	2	2	720.58	52.3	63.87	13.7778	0.494	0.0339	0.298	0.089	0.1117	0.144	0.987	0.421	2.5786
74400	1	23	5	4	5	5	25.1	2	1	574	37.8	26.2	15.1852	0.0078	0.0339	0.035	0.0283	0.1117	0.0177	0.129	0.105	0.4684
74408	1	29	2	2	5	0.35	33.7	1	2	580.92	30.5	80.14	19.0466	0.242	0.0339	0.367	4.6	0.1117	0.159	0.926	0.316	6.7556
74411	1	28	3	4	6	5	19.7	1	1	369.85	16.8	58.58	22.0149	0.067	0.0339	0.339	0.0283	0.1117	0.032	0.38	0.122	1.1139
74422	1	29	4	4	5	0.45	24.1	1	1	553	27.3	30	20.2564	0.037	0.0339	0.241	10.7	0.1117	0.055	0.62	0.253	12.0516
74432	1	60	4	3	3	2.4558	31.7	2	1	273	28.8	28.14	9.47917	0.0078	0.105	0.017	0.067	0.4074	0.0177	0.13	0.136	0.8879
74433	1	22	3	2	5	4.48	27.6	1	1	373	22.7	11.38	16.4317	0.0078	0.461	0.017	0.0283	0.1117	0.0177	0.1	0.079	0.8225
74436	1	55	5	3	1	3.14	28.7	1	1	268	16	25.31	16.75	0.0078	0.0339	0.017	0.0283	0.1117	0.0177	0.033	0.024	0.2734
74454	1	45	5	5	3	5	26.5	2	1	208	15.8	11.64	13.1646	0.0078	0.0339	0.017	0.22	0.1117	0.0177	0.128	0.076	0.6121
74463	1	45	3	4	3	4.61	29.4	1	1	258	19.9	12.54	12.9648	0.0078	0.053	0.017	0.0283	0.1117	0.0177	0.042	0.024	0.3015
74465	1	80	1	1	1	1.42	30.8	1	1	302	25.6	73.97	11.7969	0.053	0.0794	0.22	0.0283	0.4074	0.064	0.666	0.254	1.7721
74487	1	78	3	2	1	3.09	30.4	1	2	500	37.4	92.72	13.369	0.0078	0.0339	0.017	0.044	0.1117	0.0177	0.086	0.075	0.3931
74493	1	40	1	3	6	2.3	26.2	2	2	417	16.8	45.49	24.8214	0.0078	0.224	0.017	0.041	0.1117	0.0177	0.026	0.1668	0.612
74499	1	59	4	3	3	1.22	29.1	1	1	390	15.1	26.49	25.8278	0.0078	0.0339	0.017	0.0283	0.4074	0.0177	0.04	0.024	0.5761
74508	1	80	3	5	1	5	25.8	1	1	623	29.2	74.38	21.3356	0.0078	0.0339	0.017	0.0283	0.1117	0.0177	0.081	0.069	0.3664
74510	1	64	3	4	1	5	32.2	1	1	614	40.5	27.22	15.1605	0.0078	0.0339	0.017	0.0283	0.1117	0.0177	0.038	0.024	0.2784
74512	1	80	3	1	1	2.23	29.9	1	1	384	33.9	69.99	11.3274	0.0078	0.0339	0.017	0.0283	0.1117	0.0177	0.029	0.024	0.2694
74529	1	51	1	1	1	1.27	32.5	1	1	303	19.9	34.11	15.2261	0.0078	0.0339	0.017	0.0283	0.1117	0.0177	0.507	0.435	1.1584
74536	1	65	2	4	1	1.93	28.2	1	1	345.58	25.8	41.01	13.3946	0.0078	0.0339	0.017	0.0283	0.1117	0.0177	0.041	0.076	0.3334
74542	1	46	3	2	5	0.08	21.5	1	1	1170	49.9	72.2	23.4469	0.173	0.0339	0.228	0.0283	0.1117	0.076	0.646	0.278	1.5749
74547	1	43	3	4	3	1.61	20.8	1	1	447	22.3	67.76	20.0448	0.365	0.0339	1.05	0.0283	0.1117	0.303	1.8	0.569	4.2609
74560	1	36	3	3	1	0.54	31.8	1	1	503	35.6	49.07	14.1292	0.11	0.0339	0.36	0.0283	0.1117	0.095	0.785	0.302	1.8259
74565	1	66	2	1	1	2.4558	23.9	1	1	479.86	20.9	52.69	22.9598	0.181	0.0339	0.25	0.043	0.1117	0.069	0.683	0.25	1.6216
74571	1	53	3	5	1	5	22.5	2	1	250	15.9	27.89	15.7233	0.0078	0.0339	0.017	0.244	0.1117	0.0177	0.057	0.024	0.5131
74586	1	24	5	2	6	0.83	24.7	1	1	650	36.9	21.48	17.6152	0.032	0.0339	0.251	0.0283	0.1117	0.029	0.354	0.185	1.0249
74589	1	67	3	5	5	1.27	21.2	2	2	594	34.1	71.85	17.4194	0.0078	0.0339	0.017	0.053	0.1117	0.0177	0.037	0.024	0.3021
74591	1	73	4	4	1	1.53	24	1	1	524	22.2	59.7	23.6036	0.065	0.0339	0.093	0.393	0.1117	0.043	0.371	0.123	1.2336
74598	1	58	3	2	1	5	32.9	2	1	387	35.7	38.72	10.8403	0.0078	0.0339	0.017	0.0283	0.1117	0.0177	0.029	0.024	0.2694
74607	1	68	5	5	1	2.4558	23.8	1	2	547	29.4	75.08	18.6054	0.0078	0.0339	0.017	0.0283	0.1117	0.0177	0.056	0.035	0.3074
74638	1	34	2	4	6	4.77	26.4	2	1	228	24.4	24.17	9.34426	0.0078	0.0339	0.017	0.0283	0.1117	0.0177	0.203	0.047	0.4664
74639	1	51	1	4	5	1.11	28.1	2	1	424	28.7	22.03	14.7735	0.0078	0.0794	0.017	0.0283	0.1117	0.0177	0.029	0.024	0.3149
74646	1	49	1	4	5	0.7	20	2	2	710	26.7	59.77	26.5918	0.0078	0.0339	0.017	0.09	0.1117	0.0177	0.052	0.024	0.3541
74650	1	56	1	4	1	1.52	33.3	2	2	251	20.6	29.63	12.1845	0.0078	0.0339	0.017	0.397	0.1117	0.0177	0.076	0.056	0.7171
74663	1	52	5	5	1	1.59	18.1	1	2	579	30.6	51.89	18.9216	0.0078	0.0339	0.017	0.058	0.1117	0.0177	0.039	0.042	0.3271
74679	1	39	1	1	1	2.4558	31.5	2	1	394	15.4	39.74	25.5844	0.0078	0.0339	0.017	0.043	0.1117	0.0177	0.088	0.068	0.3871
74692	1	24	4	2	5	0.7	21.5	2	1	644.34	28.8	35.77	22.3729	0.0078	0.0339	0.017	1.27	0.1117	0.029	0.042	0.024	1.5354
74694	1	71	4	2	1	2.4558	27	1	1	638	32.5	168.8	19.6308	0.0078	0.0339	0.017	1.01	0.1117	0.0177	0.056	0.04	1.2941
74695	1	53	4	2	4	0.61	28.7	1	1	198.36	55.3	26.05	3.58698	0.091	0.0339	0.177	0.0283	0.1117	0.064	0.418	0.172	1.0959
74696	1	62	3	4	1	1.92	33.8	1	1	303	35.9	24.04	8.44011	0.0078	0.0339	0.017	0.0283	0.1117	0.0177	0.118	0.098	0.4324
74698	1	34	3	5	1	2.89	21.9	1	1	703.2	22.9	48.32	30.7074	0.177	0.05	0.1012	0.402	0.1117	0.077	0.729	0.297	1.9449
74702	1	68	3	5	1	5	33.4	1	1	229.55	23.2	32	9.8944	0.0078	0.086	0.017	0.0283	0.1117	0.0177	0.059	0.038	0.3655
74703	1	32	4	4	5	0.78	35.7	1	1	621	22.4	40.42	27.7232	0.082	0.0339	0.12	0.224	0.1117	0.032	0.369	0.143	1.1156
74708	1	76	5	1	1	5	23	1	1	286	20.8	40.65	13.75	0.256	0.0339	0.224	0.0283	0.1117	0.117	0.614	0.288	1.6729
74718	1	52	4	4	1	5	35.2	2	1	253	12.7	71.5	19.9213	0.0078	0.0794	0.017	0.743	0.1117	0.0177	0.035	0.024	1.0356
74743	1	41	2	4	6	1.58	25.5	2	1	304	13.9	32.06	21.8705	0.0078	0.0339	0.017	0.737	0.1117	0.0177	0.051	0.04	1.0161
74746	1	55	3	3	1	0.72	21.7	1	1	400.24	14.2	53.3	28.1859	0.0078	0.0339	0.017	0.0283	0.1117	0.0177	0.051	0.024	0.2914
74748	1	36	4	2	5	2.4558	34.8	1	1	271	17.3	26.51	15.6647	0.072	0.0339	0.192	0.159	0.1117	0.052	0.527	0.187	1.3346
74763	1	33	4	3	5	1.27	26.8	1	1	151.38	14.8	28.25	10.2284	0.317	0.0339	2.48	0.157	2.87	0.191	1.6	0.325	7.9739
74764	1	31	3	2	6	0.43	19.5	1	1	620	17.8	57.3	34.8315	0.203	0.0339	0.557	0.0283	0.1117	0.213	1.15	0.419	2.7159
74800	1	28	4	2	5	0.69	20.9	2	2	651	42.2	60.9	15.4265	0.085	0.0339	0.233	0.147	0.1117	0.073	0.602	0.242	1.5276
74801	1	36	3	5	1	1	27.7	2	2	249	21.2	19.84	11.7453	0.0078	0.0339	0.017	0.169	0.1117	0.0177	0.06	0.055	0.4721
74826	1	47	3	5	1	5	28.5	2	1	713	30.4	56.91	23.4539	0.0078	0.0339	0.017	0.0283	0.4074	0.0177	0.028	0.024	0.5641
74839	1	47	3	5	1	5	32.1	1	1	379	26.1	40	14.5211	0.0078	0.0339	0.017	0.8817	0.1117	0.0177	0.108	0.074	1.2518
74860	1	40	5	4	1	2.36	25.5	2	1	178	18.5	16.7	9.62162	0.0078	0.0339	0.017	0.0283	0.1117	0.0177	0.044	0.024	0.2844
74872	1	50	1	4	6	5	28.6	2	2	466	15.6	54.41	29.8718	0.0078	0.0339	0.017	0.0283	0.1117	0.0177	0.112	0.066	0.3944
74880	1	39	3	4	5	0.97	31.8	2	1	298.34	31.6	26.21	9.44114	0.0078	0.0339	0.017	0.708	0.1117	0.0177	0.093	0.038	1.0271
74889	1	50	3	2	1	2.12	17.9	1	1	691	28.4	84.92	24.331	0.157	0.0339	0.236	0.045	0.1117	0.11	0.739	0.297	1.7296
74890	1	30	3	3	5	0.69	26.8	2	2	392	17.2	30.51	22.7907	0.0078	0.0339	0.017	0.0283	0.1117	0.0177	0.08	0.024	0.3204
74909	1	64	2	3	1	1.25	24.8	1	1	453	21.7	45.92	20.8756	0.0078	0.0339	0.017	0.147	0.1117	0.0177	0.095	0.05	0.4801
74923	1	24	4	4	5	1.42	35.1	1	1	513	30.34	20.93	16.9084	0.0078	0.126	0.032	0.092	0.1117	0.0177	0.098	0.055	0.5402
74931	1	53	3	4	1	2.4558	26.8	2	1	478	22.3	52.32	21.435	0.0078	0.0339	0.017	0.047	0.1117	0.0177	0.055	0.04	0.3301
74932	1	32	5	4	1	2.4558	27.1	1	1	413	26	13.39	15.8846	0.126	0.0339	0.167	0.0283	0.1117	0.069	0.486	0.19	1.2119
74946	1	62	4	3	5	0.16	27.7	1	1	440.59	29.3	46.84	15.0372	0.0078	0.0339	0.017	0.22	0.1117	0.0177	0.153	0.055	0.6161
74965	1	26	5	4	5	2.4558	54	2	1	295	32.6	18.62	9.04908	0.0078	0.0339	0.028	0.109	0.1117	0.0177	0.126	0.096	0.5301
74982	1	43	4	3	5	2.4558	39.3	2	1	185.77	29.7	18.6	6.25488	0.0078	0.108	0.017	0.263	0.1117	0.0177	0.068	0.024	0.6172
74984	1	64	1	1	5	2.4558	25.5	2	1	510	32.5	52.66	15.6923	0.0078	0.0339	0.017	0.0283	0.1117	0.0177	0.056	0.044	0.3164
74990	1	47	3	4	5	0.62	26.3	1	1	420	20	30.34	21	0.0078	0.0794	0.017	0.0283	0.1117	0.0177	0.035	0.024	0.3209
75012	1	60	3	5	1	5	27.3	1	1	380	20.4	40.3	18.6275	0.0078	0.0339	0.017	0.0283	0.1117	0.0177	0.073	0.1668	0.4562
75017	1	54	4	2	5	1.77	16.8	1	1	697	12	137.9	58.0833	0.022	0.087	0.039	4.51	0.1117	0.0177	0.139	0.067	4.9934
75049	1	59	3	4	1	2.4558	31	1	1	226	14.9	24.62	15.1678	0.0078	0.0339	0.017	0.066	0.1117	0.0177	0.072	0.068	0.3941
75060	1	32	4	3	5	5	38.2	2	1	326	27.3	31.61	11.9414	0.0078	0.0339	0.017	0.0283	0.1117	0.0177	0.03	0.024	0.2704
75068	1	72	5	4	2	1.46	31.5	1	1	250	28.1	20.46	8.8968	0.0078	0.0339	0.017	0.0283	0.1117	0.0177	0.0177	0.024	0.2581
75071	1	33	5	4	1	1.27	35.4	2	1	198.91	17.3	13.2	11.4977	0.0078	0.0794	0.017	3.99	0.1117	0.0177	0.071	0.024	4.3186
75085	1	26	1	3	5	1.31	21.2	2	1	408.8	20.8	46.05	19.6538	0.0078	0.0794	0.017	0.156	0.1117	0.0177	0.051	0.024	0.4646
75098	1	25	2	5	1	2.3	32.9	2	1	393	22.8	15.86	17.2368	0.0078	0.0339	0.017	0.0283	0.1117	0.0177	0.048	0.024	0.2884
75124	1	47	5	5	1	5	30.1	2	1	281.19	22.2	30.82	12.6662	0.0078	0.0339	0.017	0.0283	0.1117	0.0177	0.137	0.097	0.4504
75146	1	49	4	5	1	5	43.1	2	2	342	33.7	49.17	10.1484	0.0078	0.0339	0.017	0.093	0.1117	0.0177	0.041	0.024	0.3461
75147	1	42	5	5	3	5	21.1	1	1	632	31.8	54.13	19.8742	0.0078	0.05	0.017	0.053	0.1117	0.0177	0.051	0.024	0.3322
75160	1	64	3	2	1	1.59	24.7	1	1	702	33.1	71.24	21.2085	0.229	0.0339	0.25	0.0283	0.1117	0.076	0.782	0.269	1.7799
75174	1	76	4	1	1	0.78	25.6	1	1	412	28.7	44.16	14.3554	0.0078	0.0339	0.017	0.654	0.1117	0.0177	0.06	0.069	0.9711
75175	1	34	5	5	1	3.48	23.6	2	1	524	24	40.11	21.8333	0.0078	0.0339	0.017	0.0283	0.1117	0.0177	0.043	0.024	0.2834
75207	1	65	5	4	3	2.09	24.2	1	1	354.25	14.6	27.12	24.2637	0.0078	0.0794	0.041	16.5	0.1117	0.0177	0.138	0.166	17.0616
75211	1	37	5	5	1	4.19	24.5	1	1	223	10.8	21.68	20.6481	0.0078	0.0339	0.017	0.488	0.1117	0.0177	0.055	0.06	0.7911
75216	1	54	3	1	5	1.44	33.7	1	1	368	25.4	71.27	14.4882	0.0078	0.0339	0.161	0.0283	0.1117	0.0177	0.149	0.074	0.5834
75217	1	54	3	4	3	0.51	28.1	1	1	289	9.36	96.83	30.8761	0.163	0.0339	0.26	0.8817	0.1117	0.089	0.723	0.324	2.5863
75221	1	44	3	3	5	2.14	38.2	1	1	434	25.6	48.13	16.9531	0.325	0.0339	0.414	0.0283	0.1117	0.16	1.19	0.472	2.7349
75232	1	63	1	1	5	1.05	31.2	1	2	225	15.2	31.43	14.8026	0.083	0.0339	0.117	0.0283	0.1117	0.042	0.398	0.182	0.9959
75237	1	54	3	2	1	1	41.6	1	1	256	22.7	41.4	11.2775	0.108	0.0339	0.143	0.18	0.4074	0.044	0.389	0.162	1.4673
75252	1	43	3	4	5	3.46	30.5	1	1	558	27	50.97	20.6667	0.104	0.0339	0.148	0.0283	0.1117	0.083	0.388	0.268	1.1649
75256	1	44	2	2	1	1.42	30.2	1	1	236	18.8	24.65	12.5532	0.03	0.0339	0.043	0.0283	0.1117	0.0177	0.163	0.098	0.5256
75258	1	20	3	2	5	0.35	27	1	1	160	11.6	28.24	13.7931	0.012	0.0339	0.017	0.0283	0.1117	0.0177	0.182	0.062	0.4646
75262	1	80	3	5	1	5	28.2	2	1	377.98	32.3	78.19	11.7022	0.0078	0.0339	0.017	0.0283	0.1117	0.0177	0.123	0.117	0.4564
75277	1	70	3	4	1	1.08	48.3	2	1	449	50.2	79.24	8.94422	0.0078	0.0339	0.017	0.0283	0.1117	0.0177	0.131	0.086	0.4334
75290	1	21	5	4	5	2.4558	31.2	2	2	329	24.1	10.51	13.6515	0.0078	0.0339	0.017	0.0283	0.1117	0.0177	0.064	0.04	0.3204
75298	1	72	4	3	1	5	26	2	2	355	14.7	62.33	24.1497	0.0078	0.053	0.017	0.215	0.1117	0.0177	0.068	0.042	0.5322
75301	1	48	3	3	3	0.12	17.3	1	1	352.03	34.3	48.92	10.2633	0.074	0.0339	0.118	0.053	0.1117	0.046	0.327	0.14	0.9036
75306	1	59	5	4	1	1	21.4	2	2	549	16.6	61.89	33.0723	0.0078	0.0339	0.017	0.0283	0.1117	0.0177	0.039	0.024	0.2794
75327	1	34	1	3	1	1.47	30.4	2	1	574	24.2	59.55	23.719	0.0078	0.0339	0.017	0.058	0.1117	0.0177	0.043	0.237	0.5261
75330	1	55	3	4	3	1.89	23.9	1	1	311	11.7	40.17	26.5812	0.089	0.0339	0.239	0.122	0.1117	0.056	0.451	0.139	1.2416
75334	1	66	2	3	1	3.69	31.1	1	1	204	12.8	16.85	15.9375	0.0078	0.118	0.017	0.0283	0.1117	0.0177	0.106	0.024	0.4305
75335	1	30	4	2	5	0.54	34.2	2	1	282	21.8	14.02	12.9358	0.0078	0.0339	0.107	0.175	0.1117	0.0177	0.17	0.183	0.8061
75339	1	34	3	3	5	2.35	37	1	1	369.59	19.3	38.18	19.1497	0.116	0.0339	0.171	0.064	0.1117	0.092	0.467	0.172	1.2276
75342	1	73	3	3	1	4.48	27.9	2	2	415	15.5	56.07	26.7742	0.0078	0.0339	0.017	0.113	0.1117	0.0177	0.12	9.63	10.0511
75343	1	80	3	2	1	1.34	31.7	1	1	335	30.1	71.54	11.1296	0.0078	0.0339	0.017	0.0283	0.1117	0.0177	0.087	0.064	0.3674
75344	1	62	3	2	1	5	36.7	1	1	488	26	59.59	18.7692	0.0078	0.0339	0.017	0.0283	0.1117	0.0177	0.291	0.159	0.6664
75352	1	30	2	4	1	2.4558	27.9	1	1	187	14.9	21.48	12.5503	0.0078	0.0339	0.017	0.0283	0.1117	0.0177	0.057	0.024	0.2974
75358	1	40	1	2	1	2.4558	29.6	2	1	533	22.3	26.51	23.9013	0.0078	0.0339	0.017	0.0283	0.1117	0.0177	0.053	0.04	0.3094
75362	1	40	2	4	1	2.78	25.6	2	1	161	22.8	21.77	7.0614	0.0078	0.0339	0.017	0.0283	9.75	0.0177	0.068	0.057	9.9797
75382	1	54	4	3	5	0.57	28.7	1	1	314	22.4	41.93	14.0179	0.087	0.0339	0.137	0.15	0.1117	0.054	0.378	0.152	1.1036
75390	1	36	5	5	5	4.77	28.6	2	1	253	21.8	22.03	11.6055	0.0078	0.0339	0.017	0.0283	0.1117	0.0177	0.059	0.024	0.2994
75395	1	53	4	4	1	3.45	28.7	1	1	519	31.3	52.64	16.5815	0.0078	0.0339	0.017	0.0283	0.1117	0.0177	0.038	0.187	0.4414
75409	1	47	1	1	1	1.38	26.2	1	1	516	17.8	37.29	28.9888	0.035	0.0339	0.055	0.0283	0.1117	0.029	0.246	0.078	0.6169
75414	1	56	5	5	1	5	23.5	2	1	443	29.2	39.82	15.1712	0.0078	0.0339	0.017	0.056	0.1117	0.0177	0.07	0.042	0.3561
75416	1	61	3	4	1	1.08	39.9	1	1	387	37.9	47.53	10.2111	0.099	0.0339	0.154	0.0283	0.1117	0.055	0.464	0.155	1.1009
75418	1	64	4	4	1	4.04	27.5	2	1	446	54	41.71	8.25926	0.0078	0.0339	0.017	0.568	0.1117	0.0177	0.053	0.024	0.8331
75443	1	74	3	3	1	0.86	34.9	2	1	482.59	30.2	77	15.9798	0.0078	0.0339	0.1012	0.0283	0.1117	0.0177	0.129	0.123	0.5526
75451	1	56	4	4	4	5	25.9	2	1	652	49.7	41.02	13.1187	0.0078	0.0339	0.017	0.0283	0.1117	0.0177	0.056	0.044	0.3164
75456	1	80	3	5	2	4.35	23.7	1	1	411.52	24.7	150.6	16.6607	0.0078	0.0339	0.31	0.044	0.1117	0.0177	1.89	1.19	3.6051
75457	1	27	3	3	3	3.89	20.4	1	1	397	26.9	24.37	14.7584	0.053	0.0339	0.062	0.049	0.1117	0.03	0.226	0.101	0.6666
75458	1	61	3	4	1	3.1	37.2	2	1	246	24.1	35.98	10.2075	0.0078	0.349	0.017	0.0283	0.1117	0.0177	0.101	0.087	0.7195
75468	1	54	3	5	1	5	34.6	2	1	226	22.9	28.99	9.869	0.0078	0.0339	0.017	0.512	0.1117	0.0177	0.072	0.056	0.8281
75483	1	57	4	2	1	0.19	30.4	1	1	438	24.2	142.2	18.0992	0.043	0.0339	0.142	0.0283	0.1117	0.026	0.231	0.138	0.7539
75487	1	51	1	4	1	2.4558	21.1	1	1	589.81	15.9	62.49	37.095	0.0078	0.053	0.017	0.0283	0.1117	0.0177	0.032	0.024	0.2915
75495	1	66	4	2	3	0.86	43.1	2	2	271	41.3	44.19	6.56174	0.0078	0.0339	0.017	0.85	0.1117	0.0177	0.0177	0.024	1.0798
75499	1	60	3	3	1	5	28.2	2	2	486.26	25.1	44.42	19.3729	0.0078	0.066	0.1012	0.0283	0.1117	0.0177	0.058	0.049	0.4397
75515	1	21	1	4	5	5	24.7	2	1	521	22.9	36.02	22.7511	0.0078	0.0339	0.017	0.0283	0.1117	0.0177	0.056	0.046	0.3184
75526	1	20	5	4	5	3.14	31.3	2	1	614	39.5	27.58	15.5443	0.0078	0.0339	0.017	0.0283	0.4074	0.0177	0.049	0.024	0.5851
75532	1	36	1	2	1	1.34	31.3	1	1	527	18.9	32.09	27.8836	0.0078	0.0339	0.017	0.0283	0.1117	0.0177	0.163	0.086	0.4654
75556	1	22	1	2	5	1.59	26.9	1	1	405	26.4	19.19	15.3409	0.0078	0.0339	0.017	0.0283	0.1117	0.0177	0.03	0.024	0.2704
75562	1	66	4	4	1	3.18	25.4	1	1	447	17.6	38.4	25.3977	0.203	0.0339	0.433	0.0283	0.1117	0.169	1.05	0.379	2.4079
75585	1	31	3	5	5	2.4558	25.7	2	1	400	14	34.46	28.5714	0.0078	0.0339	0.017	0.0283	0.1117	0.0177	0.046	0.024	0.2864
75588	1	32	2	4	5	5	33.3	1	1	254	33.8	24.15	7.51479	0.0078	0.0794	0.017	0.0283	0.4074	0.0177	0.033	0.024	0.6146
75591	1	38	1	3	1	1.58	31.8	2	1	462	26.1	51.1	17.7011	0.0078	0.0339	0.035	5.48	0.1117	0.0177	0.083	0.044	5.8131
75607	1	64	3	5	3	2.06	32.7	1	2	562	47.8	116.9	11.7573	0.0078	0.0339	0.017	0.0283	0.1117	0.0177	0.06	0.079	0.3554
75610	1	56	3	3	1	0.95	29.2	1	1	353	10.4	73.84	33.9423	0.0078	0.0339	0.017	0.046	0.1117	0.0177	0.03	0.024	0.2881
75616	1	30	3	3	5	1.31	31.8	2	1	350	33.2	26.88	10.5422	0.0078	0.0339	0.017	0.0283	0.1117	0.0177	0.029	0.024	0.2694
75619	1	36	1	4	1	4.53	27.4	1	1	371	15.3	33.23	24.2484	0.0078	0.058	0.017	0.398	0.1117	0.0177	0.045	0.024	0.6792
75644	1	69	5	2	1	2.4558	26.5	1	1	419	16	43.96	26.1875	0.029	0.132	0.043	0.0283	0.1117	0.0177	0.341	0.074	0.7767
75653	1	40	4	3	1	1.44	25.7	2	2	178	13.8	14.3	12.8986	0.0078	0.0339	0.017	0.311	0.1117	0.0177	0.061	0.175	0.7351
75674	1	60	4	2	4	1.11	28.3	1	1	273	18.3	26.61	14.918	0.051	0.0339	0.276	0.0283	0.1117	0.064	0.506	0.156	1.2269
75686	1	41	3	5	1	1.92	32.6	2	1	183	14	12.15	13.0714	0.0078	0.0339	0.017	0.048	0.1117	0.0177	0.88	0.059	1.1751
75700	1	68	2	1	3	0.86	24.4	1	1	343	20	51.16	17.15	0.0078	0.0794	0.017	0.712	0.1117	0.0177	0.027	0.024	0.9966
75710	1	35	3	5	1	5	41.1	2	1	356	15.9	20.11	22.3899	0.0078	0.0339	0.017	0.0283	0.1117	0.0177	0.05	0.1668	0.4332
75724	1	66	1	1	1	1.63	29.5	2	1	315	21.6	52.62	14.5833	0.0078	0.0339	0.017	2.92	0.1117	0.0177	0.058	0.046	3.2121
75725	1	24	3	5	5	0.86	23.3	1	1	490	21.6	26.95	22.6852	0.0078	0.0339	0.017	0.066	0.1117	0.0177	0.043	0.024	0.3211
75749	1	69	2	3	3	0.72	27.4	1	1	255	12.6	40.51	20.2381	0.05	0.0339	0.171	0.0283	0.1117	0.08	0.671	0.236	1.3819
75750	1	70	3	5	1	5	27.3	2	1	391	22.8	52.12	17.1491	0.0078	0.0339	0.017	0.0283	0.1117	0.0177	0.043	0.05	0.3094
75751	1	47	3	5	1	5	28.1	1	1	182	18	26.23	10.1111	0.0078	0.0339	0.017	0.0283	0.1117	0.0177	0.079	0.049	0.3444
75754	1	55	3	4	1	0.61	28.7	1	1	622	46.9	56.54	13.2623	0.0078	0.0339	0.017	0.13	0.1117	0.0177	0.067	0.061	0.4461
75771	1	70	3	2	1	2.4558	31.6	2	1	244.23	14	35.96	17.445	0.0078	0.0339	0.017	0.0283	0.1117	0.0177	0.093	0.077	0.3864
75774	1	80	3	5	1	1.29	25.1	1	1	501	24.7	84	20.2834	0.0078	0.0339	0.017	0.0283	0.1117	0.0177	0.105	0.095	0.4164
75775	1	41	3	2	1	2.4558	23.9	1	1	561	24	39.39	23.375	0.257	0.0339	0.378	0.0283	0.1117	0.196	0.854	0.313	2.1719
75789	1	58	3	3	1	5	27.5	1	1	306	17.1	29.89	17.8947	0.0078	0.0339	0.1012	0.089	0.1117	0.0177	0.296	0.198	0.8553
75814	1	28	3	4	5	0.04	41.5	2	1	215	30.7	23.73	7.00326	0.0078	0.0339	0.017	0.052	0.1117	0.0177	0.064	0.154	0.4581
75835	1	31	3	4	5	5	25.5	1	1	350	10.2	33.19	34.3137	0.324	0.0339	0.422	0.0283	0.1117	0.169	1	0.369	2.4579
75845	1	59	1	4	4	2.56	33.2	1	1	335	14.4	46.7	23.2639	0.098	0.0339	0.181	0.498	0.1117	0.042	0.91	1.28	3.1546
75848	1	59	3	5	1	5	33.8	2	1	414	26.1	39.65	15.8621	0.0078	0.0339	0.017	0.0283	0.1117	0.0177	0.057	0.091	0.3644
75860	1	60	5	5	1	4.77	40.7	2	1	460	25	43.25	18.4	0.0078	0.0339	0.017	0.8817	0.1117	0.0177	0.134	0.144	1.3478
75869	1	27	4	4	1	1.89	32.6	1	1	388	39.1	23.7	9.92327	0.032	0.0339	0.048	0.0283	0.1117	0.0177	0.296	0.081	0.6486
75879	1	56	3	5	5	1.03	16.9	1	1	346	11.8	98.12	29.322	0.033	0.0339	0.071	0.8817	0.1117	0.029	0.216	0.132	1.5083
75898	1	24	3	4	6	2.12	27.6	1	1	87.9	14.7	21.72	5.97959	0.085	0.0339	0.115	0.063	0.1117	0.039	0.332	0.132	0.9116
75907	1	40	3	5	1	1.39	27.9	2	2	274	26.7	22.85	10.2622	0.0078	0.0339	0.017	0.0283	0.1117	0.0177	0.062	0.042	0.3204
75910	1	30	3	4	1	1.51	27.1	2	2	256	16.8	27.14	15.2381	0.0078	0.0339	0.017	0.0283	0.1117	0.0177	0.057	0.039	0.3124
75911	1	67	4	3	4	4.28	21.6	2	1	902	34.6	86.73	26.0694	0.0078	0.0339	0.017	1.28	0.1117	0.0177	0.995	0.059	2.5221
75921	1	76	4	4	1	5	30.2	2	1	237	19.1	45.57	12.4084	0.0078	0.0339	0.017	0.605	0.1117	0.0177	0.041	0.117	0.9511
75925	1	51	4	2	3	0.6	22.5	1	1	536	21.7	75.25	24.7005	0.05	0.0339	1.18	0.566	0.1117	0.034	0.511	0.157	2.6436
75927	1	30	4	4	5	2.4558	20.6	1	1	508	33.8	65.68	15.0296	0.183	0.0339	0.37	0.0283	3.55	0.087	0.77	0.158	5.1802
75937	1	77	3	4	1	5	31.9	1	1	258	12.7	46.66	20.315	0.0078	0.0339	0.017	0.0283	0.1117	0.0177	0.053	0.024	0.2934
75942	1	78	4	4	1	3.56	23.9	1	1	621	26.8	69.91	23.1716	0.058	0.0339	0.113	0.0283	0.1117	0.038	0.385	0.152	0.9199
75957	1	21	1	3	5	5	21.5	2	1	643	13.7	48.02	46.9343	0.0078	0.0339	0.029	0.0283	0.1117	0.0177	0.12	0.048	0.3964
75962	1	64	1	1	1	1.26	30.7	2	2	304	15.9	46.61	19.1195	0.0078	0.0339	0.017	0.051	0.1117	0.0177	0.149	0.046	0.4341
75970	1	30	3	2	6	0.93	29.5	1	1	525	25.1	31.95	20.9163	0.142	0.0339	0.255	0.111	0.1117	0.057	0.561	0.198	1.4696
75975	1	31	3	3	4	1.54	24.9	1	1	868	28.9	103.5	30.0346	0.107	0.0339	0.181	0.085	0.1117	0.054	0.569	0.245	1.3866
75976	1	67	4	4	2	1.97	31.1	2	2	521	46.7	44.6	11.1563	0.0078	0.0339	0.017	0.05	0.1117	0.0177	0.048	0.024	0.3101
75977	1	25	3	5	5	1.71	24.1	2	1	708	19.5	50.01	36.3077	0.0078	0.0339	0.133	0.0283	0.1117	0.0177	0.219	0.161	0.7124
75978	1	71	3	5	1	2.38	38.2	2	1	476	30.1	51.15	15.814	0.0078	0.0339	0.017	0.049	0.4074	0.0177	0.041	0.024	0.5978
75980	1	31	3	5	1	5	23.9	2	1	473	23.2	34.03	20.3879	0.0078	0.0339	0.017	0.0283	0.1117	0.0177	0.053	0.037	0.3064
75986	1	55	2	5	1	2.1	22.9	2	2	490	16.6	46.29	29.5181	0.0078	0.0339	0.017	0.0283	0.1117	0.0177	0.054	0.024	0.2944
75989	1	32	4	2	5	1.29	21	1	1	246	16.2	22.62	15.1852	0.168	0.0339	0.337	0.272	0.1117	0.061	0.8	0.267	2.0506
75993	1	48	3	4	1	5	25.7	2	1	202	15.8	22.65	12.7848	0.0078	0.0339	0.017	0.0283	0.1117	0.0177	0.042	0.046	0.3044
76012	1	59	5	1	1	2.52	26.2	1	2	352	19	30.26	18.5263	0.0078	0.0339	0.017	0.093	0.1117	0.0177	0.244	0.082	0.6071
76016	1	79	3	5	1	3.1	25.9	2	1	273	16.8	66.66	16.25	0.0078	0.0339	0.017	0.0283	0.1117	0.0177	0.129	0.099	0.4444
76019	1	29	2	4	1	0.06	17.3	1	1	577	14.1	57.41	40.922	0.133	0.0339	0.219	0.048	0.1117	0.07	0.617	0.223	1.4556
76023	1	67	4	5	1	5	31.2	2	1	399	25.7	68.79	15.5253	0.0078	0.0339	0.017	0.047	0.1117	0.0177	0.05	0.024	0.3091
76036	1	64	2	1	5	0.04	27.5	1	1	324	22	91.82	14.7273	0.13	0.0339	0.248	0.0283	0.1117	0.083	0.625	0.224	1.4839
76048	1	49	3	4	3	1.52	29.7	1	1	387	22	43.64	17.5909	0.0078	0.0339	0.017	0.0283	0.1117	0.0177	0.168	0.069	0.4534
76049	1	54	3	2	6	2.02	26.9	1	1	338	14.8	32.99	22.8378	0.115	0.0339	0.25	0.0283	0.1117	0.089	0.529	0.209	1.3659
76051	1	50	3	4	1	2.4558	28.5	1	1	466	34.4	38.31	13.5465	0.092	0.0339	0.175	0.0283	0.1117	0.05	0.382	0.146	1.0189
76059	1	21	4	3	6	4.45	23.4	2	1	333	18.6	35.98	17.9032	0.0078	0.0794	0.017	0.256	0.1117	0.0177	0.085	0.037	0.6116
76067	1	26	3	3	1	2.82	22.8	2	1	737	26.8	53.96	27.5	0.0078	0.0339	0.318	0.0283	0.1117	0.0177	1.67	0.813	3.0004
76069	1	44	4	5	1	4.25	30.7	2	1	369.24	35.3	19.58	10.4601	0.0078	0.0794	0.017	0.449	0.1117	0.0177	0.17	0.117	0.9696
76072	1	73	3	1	1	0.64	25.9	1	1	600	20.7	63.18	28.9855	0.079	0.0339	0.11	0.097	0.1117	0.04	0.305	0.154	0.9306
76073	1	21	3	4	5	5	20.2	2	2	483	20	24.44	24.15	0.0078	0.0794	0.017	0.134	0.1117	0.0177	0.034	0.024	0.4256
76078	1	48	2	5	1	5	27.6	1	1	914	23.3	31.05	39.2275	0.0078	0.321	0.017	0.0283	0.1117	0.0177	0.065	0.024	0.5925
76082	1	30	3	5	1	5	20.9	2	1	260	8.45	26.99	30.7692	0.0078	0.0339	0.13	0.087	0.1117	0.0177	0.0177	0.035	0.4408
76087	1	55	2	3	1	4.16	30.6	1	1	283	16.1	30.78	17.5776	0.0078	0.0339	0.029	0.049	0.1117	0.029	0.119	9.81	10.1894
76088	1	27	3	5	1	5	25.6	1	1	205	17.2	10.74	11.9186	0.0078	0.0339	0.074	0.069	0.1117	0.0177	0.113	0.056	0.4831
76090	1	44	3	5	5	5	34.6	1	1	518	25.9	49.85	20	0.153	0.0339	0.216	0.0283	0.1117	0.107	0.538	0.745	1.9329
76096	1	37	1	4	1	5	21.8	2	1	816	19	133.7	42.9474	0.0078	0.0794	0.1012	0.0283	0.1117	0.0177	0.296	0.163	0.8051
76108	1	48	3	1	1	3.63	29.3	2	2	294.07	30.1	22.08	9.76977	0.0078	0.05	0.017	0.056	0.1117	0.0177	0.346	0.1	0.7062
76109	1	36	5	5	1	2.12	67.9	2	2	273	40.1	41.01	6.80798	0.0078	0.0339	0.017	0.0283	0.1117	0.0177	0.055	0.041	0.3124
76110	1	22	3	2	6	0.5	17	1	1	338	19	34.27	17.7895	0.05	0.0339	0.236	0.049	0.1117	0.054	0.479	0.225	1.2386
76112	1	63	4	5	1	5	29.6	2	2	480	33.4	57.37	14.3713	0.0078	0.0794	0.017	0.341	0.1117	0.0177	0.091	0.024	0.6896
76116	1	68	3	4	1	2.4558	35.4	1	1	285.39	15.7	39.89	18.1777	0.107	0.0339	0.1012	0.0283	0.1117	0.062	0.5	0.19	1.1341
76119	1	49	4	4	5	0.75	26.5	1	1	603	16.5	62	36.5455	0.105	0.0794	0.515	0.167	0.161	0.042	0.537	0.165	1.7714
76127	1	67	4	3	1	5	31.6	1	1	199	25.4	28.87	7.83465	0.0078	0.0339	0.017	0.0283	0.1117	0.0177	0.092	0.131	0.4394
76134	1	58	3	3	5	1.21	27.8	1	1	585	17.2	65.86	34.0116	0.074	0.0339	0.098	0.246	0.1117	0.038	0.353	0.136	1.0906
76144	1	80	3	2	3	0.86	32.4	1	2	428	25.2	55.28	16.9841	0.0078	0.0339	0.017	0.0283	0.1117	0.0177	0.06	0.039	0.3154
76151	1	55	3	1	2	0.57	23.9	1	1	698	51.4	52.75	13.5798	0.122	0.0339	0.35	0.405	0.1117	0.123	0.909	0.379	2.4336
76156	1	61	4	1	4	2.69	18.5	1	1	223	16.7	76.09	13.3533	0.208	0.0339	0.464	0.072	0.1117	0.142	1.08	0.361	2.4726
76161	1	34	3	4	1	1.61	40.1	2	1	569	30.1	44.18	18.9037	0.0078	0.0339	0.017	0.071	0.1117	0.0177	0.072	0.024	0.3551
76168	1	52	3	2	3	0.72	27.5	1	1	236	25.9	23.5	9.11197	0.093	0.0339	0.173	0.0283	0.1117	0.067	0.477	0.206	1.1899
76174	1	21	3	3	5	2.35	20.2	2	1	558	27.5	41.82	20.2909	0.0078	0.0339	0.017	0.0283	0.1117	0.0177	0.0177	0.024	0.2581
76180	1	55	3	1	1	0.02	33.2	2	1	197.2	21.4	60.41	9.21495	0.336	0.0339	0.446	0.313	0.1117	0.193	0.986	0.301	2.7206
76190	1	48	3	3	5	1.03	27.5	1	1	580	28.1	44.77	20.6406	0.0078	0.0794	0.017	0.121	0.1117	0.0177	0.07	0.024	0.4486
76208	1	51	4	4	1	4.16	31.5	1	1	269	20.7	30.71	12.9952	0.0078	0.0339	0.017	0.177	0.1117	0.0177	0.075	0.024	0.4641
76220	1	56	3	4	1	5	25.8	2	1	460	25	42.01	18.4	0.0078	0.0339	0.017	0.0283	0.1117	0.0177	0.127	0.187	0.5304
76226	1	43	5	4	1	1.06	26.1	1	1	437.52	18.2	29.97	24.0396	0.129	0.0339	0.1012	0.0283	0.1117	0.037	7.28	1.31	9.0311
76231	1	25	1	4	1	2.82	29.7	2	1	293	17.6	11.26	16.6477	0.0078	0.0339	0.017	0.0283	0.1117	0.0177	0.059	0.048	0.3234
76232	1	29	1	2	6	0.47	25.8	1	1	521	27.3	49.9	19.0842	0.011	0.0339	0.017	0.0283	0.1117	0.0177	0.17	0.152	0.5416
76240	1	35	3	3	1	1.13	37.5	2	1	230	17.6	35.64	13.0682	0.0078	0.0339	0.017	0.0283	0.1117	0.0177	0.032	0.024	0.2724
76241	1	20	3	3	5	4.87	26.4	1	1	449.79	24.3	15.62	18.5099	0.181	0.0794	0.243	0.0283	0.1117	0.101	0.685	0.216	1.6454
76246	1	44	2	4	1	0.82	21.4	1	1	308	12.8	36.7	24.0625	0.103	0.0339	0.254	0.131	0.1117	0.053	0.718	0.174	1.5786
76267	1	63	4	2	1	2.53	43.1	1	1	541	33.9	107.9	15.9587	0.0078	0.0339	0.017	0.0283	0.1117	0.0177	0.059	0.046	0.3214
76277	1	80	3	3	1	0.97	31.3	1	1	325.18	31.3	71.73	10.3891	0.0078	0.0339	0.029	0.065	0.1117	0.0177	0.048	0.053	0.3661
76325	1	64	2	3	3	0.7	27.5	1	2	560	30	63.51	18.6667	0.014	0.0339	0.077	0.0283	0.1117	0.0177	0.296	0.1668	0.7454
76326	1	32	2	4	1	3.81	31.5	2	1	251	24.7	22.7	10.1619	0.0078	0.0794	0.017	0.09	0.1117	0.0177	0.089	0.024	0.4366
76335	1	65	4	5	1	2.61	29.1	1	1	499	33.3	58.24	14.985	0.088	0.0794	0.155	0.129	0.193	0.047	0.427	0.164	1.2824
76383	1	23	3	4	5	2.51	40.3	1	2	572	51.1	39.87	11.1937	0.0078	0.0794	0.017	0.0283	0.1117	0.0177	0.122	0.047	0.4309
76385	1	57	5	4	3	2.4558	28	2	1	238	15.5	19.2	15.3548	0.0078	0.0339	0.017	0.0283	0.1117	0.0177	0.032	0.024	0.2724
76397	1	69	1	2	1	1.08	26.5	1	1	274	14	77.05	19.5714	0.027	0.0339	0.046	0.0283	0.1117	0.0177	0.296	0.061	0.6216
76406	1	36	5	4	6	0.95	21.2	1	1	221.88	17.3	41.55	12.8254	0.088	0.062	0.1012	0.0283	0.1117	0.031	0.589	0.213	1.2242
76408	1	48	4	2	5	0.33	23.4	1	1	786.26	24	73.42	32.7608	0.126	0.0339	0.491	0.195	0.1117	0.123	0.93	0.41	2.4206
76424	1	60	3	5	1	4.13	27.7	2	1	251	10.7	27.95	23.4579	0.0078	0.0339	0.017	0.0283	0.1117	0.0177	0.062	0.046	0.3244
76427	1	37	5	5	1	3.22	27.4	2	1	603.88	25.2	65.99	23.9635	0.0078	0.0339	0.017	0.056	0.1117	0.0177	0.13	0.024	0.3981
76429	1	63	2	1	1	2.4558	21.8	1	1	1057.53	39.5	143.5	26.7729	0.046	0.0339	0.249	0.044	0.1117	0.052	0.604	0.212	1.3526
76433	1	44	3	2	1	1.16	27.2	1	1	384.95	20.6	49.49	18.6869	0.091	0.0339	0.218	11.5	0.1117	0.054	0.385	0.224	12.6176
76434	1	50	1	1	1	2.4558	29.2	1	1	325	14.8	26.96	21.9595	0.02	0.0339	0.074	0.225	0.1117	0.0177	0.135	0.069	0.6863
76436	1	78	3	4	2	2.61	30.6	1	1	338	31.3	42.94	10.7987	0.0078	0.0339	0.017	0.0283	0.1117	0.0177	0.064	0.053	0.3334
76437	1	64	2	2	1	0.89	27.7	1	1	379	18.4	36.68	20.5978	0.0078	0.0339	0.285	0.0283	0.1117	0.0177	0.055	0.051	0.5904
76459	1	33	4	2	5	1.29	35.8	1	1	227	25.2	15.55	9.00794	0.0078	0.0339	0.017	0.042	0.1117	0.0177	0.027	0.024	0.2811
76464	1	33	3	5	1	3.26	25.3	2	1	403	20.9	28.3	19.2823	0.0078	0.0794	0.1012	0.054	0.1117	0.0177	0.296	0.087	0.7548
76488	1	41	1	3	1	0.73	20.2	1	1	336	18.1	43.81	18.5635	0.283	0.088	0.549	0.0283	3.86	0.094	0.989	0.275	6.1663
76489	1	39	4	4	6	2.33	23.5	1	1	844	20.5	72.84	41.1707	0.088	0.0339	0.166	0.8817	0.1117	0.07	0.366	0.121	1.8383
76518	1	47	2	4	5	1.03	29.8	1	1	494	8.44	53.79	58.5308	0.0078	0.0339	0.017	0.0283	0.1117	0.0177	0.296	0.043	0.5554
76527	1	68	3	5	1	4.13	22.6	1	1	638	21.9	94.97	29.1324	0.0078	0.0339	0.017	0.0283	0.1117	0.0177	0.077	0.037	0.3304
76532	1	38	4	4	5	1.24	34.1	2	1	408	27.6	19.22	14.7826	0.0078	0.0339	0.017	0.137	0.1117	0.0177	0.0177	0.024	0.3668
76533	1	67	4	4	3	2.84	21.8	1	1	870	23.9	150.3	36.4017	0.0078	0.0339	0.017	0.0283	0.4074	0.0177	0.118	0.063	0.6931
76534	1	52	3	4	3	1.11	33.1	1	1	476	29.6	55.36	16.0811	0.023	0.0339	0.052	0.0283	0.1117	0.025	0.169	0.091	0.5339
76540	1	69	3	5	1	3.87	33.8	2	1	94.6	12.6	6.9	7.50794	0.0078	0.0339	0.017	0.05	0.1117	0.0177	0.06	0.024	0.3221
76548	1	62	4	3	1	2.77	33	1	1	175	18.1	32.31	9.66851	0.0078	0.0339	0.376	0.116	0.1117	0.0177	1.7	1.36	3.7231
76557	1	54	1	1	1	0.74	27.8	1	1	478	24.5	35.34	19.5102	0.0078	0.0339	0.017	0.848	0.1117	0.0177	0.037	0.024	1.0971
76560	1	57	5	5	1	3.22	21.1	2	2	323	14	46.61	23.0714	0.0078	0.0339	0.017	0.46	0.1117	0.0177	0.076	0.054	0.7781
76569	1	45	1	1	1	0.8	22.4	1	1	472	12.6	43.38	37.4603	0.112	0.0339	0.185	0.0283	0.1117	0.081	0.62	0.355	1.5269
76589	1	38	3	3	3	1.11	21.2	1	1	457	14	41.27	32.6429	0.0078	0.0339	0.017	0.8817	0.1117	0.0177	0.034	0.024	1.1278
76593	1	76	4	3	2	0.73	20.4	2	2	563	16.4	70.36	34.3293	0.0078	0.0339	0.017	0.0283	0.1117	0.0177	0.125	0.069	0.4104
76598	1	40	1	4	3	2.55	23.2	2	1	271	10.4	24.63	26.0577	0.0078	0.0339	0.025	0.0283	17.6	0.0177	0.182	0.068	17.9627
76604	1	61	3	4	6	1.1	25.9	1	1	460.28	22.3	73.32	20.6404	0.0078	0.0339	0.017	4.07	0.1117	0.0177	0.091	0.064	4.4131
76622	1	22	4	3	5	1.05	26.1	2	2	298	19.1	19.2	15.6021	0.0078	0.0794	0.017	0.0283	0.1117	0.0177	0.028	0.024	0.3139
76624	1	51	3	2	2	1.48	19.8	1	1	502.4	16.1	59.74	31.205	0.239	0.0339	0.3	0.082	0.1117	0.121	0.926	0.362	2.1756
76632	1	49	5	3	1	4.64	18.2	1	1	461	13.4	51.01	34.403	0.043	0.0339	0.134	0.106	0.1117	0.033	0.434	0.209	1.1046
76633	1	48	5	5	3	5	24.4	2	2	377	27.7	32.81	13.6101	0.0078	0.0339	0.017	0.0283	0.1117	0.0177	0.055	0.043	0.3144
76635	1	59	5	5	1	5	23.1	2	1	373	33.5	49.96	11.1343	0.0078	0.0339	0.017	0.659	0.1117	0.0177	0.054	0.045	0.9461
76639	1	43	4	3	5	0.08	20.4	1	1	687	38.6	55.8	17.7979	0.08	0.0339	0.183	0.0283	0.1117	0.05	0.443	0.2	1.1299
76663	1	71	1	1	1	0.7	23.9	1	1	505	15.5	58.4	32.5806	0.103	0.0339	0.108	0.0283	0.1117	0.049	0.388	0.19	1.0119
76670	1	49	3	3	3	2.61	27.1	2	1	366	23.9	28.73	15.3138	0.0078	0.0339	0.017	0.086	0.1117	0.0177	0.051	0.042	0.3671
76675	1	48	5	5	1	5	24	2	1	318	21.7	16.15	14.6544	0.0078	0.0339	0.017	0.051	0.1117	0.0177	0.058	0.036	0.3331
76688	1	68	3	5	3	3.05	49.4	1	1	274	17.8	30.48	15.3933	0.0078	0.0339	0.017	0.0283	0.1117	0.0177	0.14	0.105	0.4614
76691	1	38	2	4	5	2.4558	26.1	1	1	563	24	42.33	23.4583	0.0078	0.0339	0.017	0.0283	0.1117	0.0177	0.114	0.076	0.4064
76697	1	24	5	1	5	1.4	24.4	2	1	633	31.7	54.75	19.9685	0.0078	0.0339	0.017	0.0283	0.1117	0.0177	0.068	0.065	0.3494
76702	1	62	4	4	3	0.26	20.9	2	1	332	16.2	48.6	20.4938	0.056	0.0339	0.208	0.0283	0.1117	0.037	0.383	0.161	1.0189
76703	1	36	3	3	3	2.06	27.8	1	1	783	38.1	43.23	20.5512	0.012	0.0794	0.099	0.0283	0.1117	0.0177	0.197	0.129	0.6741
76706	1	60	2	2	5	0.52	22.9	1	1	544	13.2	73.96	41.2121	0.059	0.0339	0.336	0.0283	0.1117	0.088	0.809	0.44	1.9059
76708	1	23	4	5	5	0.05	25	2	1	469	39.5	39.13	11.8734	0.0078	0.0339	0.017	0.25	0.1117	0.0177	0.0177	0.024	0.4798
76709	1	74	3	4	1	1.59	43.7	2	1	310	25.9	42.47	11.9691	0.0078	0.0339	0.017	0.0283	0.1117	0.0177	0.058	0.286	0.5604
76722	1	73	3	4	1	5	30.2	1	1	335	21.9	64.94	15.2968	0.0078	0.0339	0.017	0.0283	0.1117	0.0177	0.034	0.024	0.2744
76733	1	77	3	4	1	2.26	38.4	1	2	554.65	40.9	116.6	13.5611	0.0078	0.0794	0.017	0.0283	0.1117	0.0177	0.054	0.024	0.3399
76742	1	40	5	5	1	5	27.7	1	1	273	16.3	24.91	16.7485	0.0078	0.0339	0.072	0.0283	0.1117	0.0177	0.026	0.024	0.3214
76745	1	70	2	1	2	0.69	28.6	1	1	277	20.1	24.66	13.7811	0.0078	0.0339	0.017	0.0283	0.1117	0.0177	0.062	0.044	0.3224
76753	1	61	3	3	6	2.13	21.7	1	1	862	27.9	116	30.8961	0.197	0.0339	0.245	0.0283	0.1117	0.089	0.715	0.334	1.7539
76754	1	76	4	4	1	5	29	2	1	693.12	34.6	85.15	20.0324	0.0078	0.0339	0.027	0.0283	0.1117	0.0177	0.104	0.024	0.3544
76756	1	44	4	1	1	0.15	27.8	2	1	260	19.6	28.74	13.2653	0.0078	0.0339	0.017	0.894	0.1117	0.0177	0.039	0.024	1.1451
76777	1	29	1	4	1	3.14	25.4	1	1	586	20.6	74.37	28.4466	0.0078	0.0339	0.017	0.0283	0.1117	0.0177	0.139	0.04	0.3954
76799	1	36	3	3	1	2.4558	26.5	1	1	525	21.3	39.29	24.6479	0.0078	0.0339	0.017	0.0283	0.1117	0.0177	0.062	0.064	0.3424
76802	1	57	4	1	1	0.39	25.8	1	2	496	30.8	41.08	16.1039	0.0078	0.063	0.017	6.89	0.1117	0.0177	0.055	0.035	7.1972
76815	1	44	4	2	3	2.4558	33.1	1	1	395	33.3	31.67	11.8619	0.065	0.0339	0.205	0.047	0.1117	0.03	0.334	0.169	0.9956
76817	1	54	4	2	1	3.18	19.6	1	1	962	28.9	90.79	33.2872	0.173	0.0339	0.207	0.065	0.1117	0.084	0.602	0.247	1.5236
76826	1	23	3	3	5	3.58	21	2	1	530	29.9	43.63	17.7258	0.08	0.0339	0.116	0.097	0.1117	0.037	0.33	0.149	0.9546
76843	1	59	4	1	3	0.54	38.1	2	1	236	30.6	34.25	7.71242	0.041	0.0339	0.078	0.0283	0.1117	0.0177	0.289	0.16	0.7596
76854	1	36	3	5	1	5	33.5	2	2	320	25.3	16.28	12.6482	0.0078	0.67	0.017	0.0283	0.1117	0.0177	0.098	0.084	1.0345
76856	1	20	3	4	1	1.26	27.6	1	2	398	13.8	17.68	28.8406	0.098	0.0339	0.256	0.0283	0.1117	0.071	1.09	0.368	2.0569
76859	1	32	5	3	4	3.33	28.9	1	1	441	32.5	30.05	13.5692	0.141	0.0339	0.139	0.0283	0.1117	0.054	0.522	0.677	1.7069
76867	1	51	4	4	3	5	25.7	1	1	380	21.6	44.96	17.5926	0.0078	0.0339	0.017	0.0283	0.1117	0.0177	0.043	0.024	0.2834
76878	1	30	3	4	5	3.6	37.2	2	1	327	29.1	20.58	11.2371	0.0078	0.0339	0.017	0.177	0.1117	0.0177	0.053	0.04	0.4581
76886	1	54	2	2	1	2.02	26.6	1	1	695	27.4	77.32	25.365	0.0078	0.0339	0.017	0.06	0.1117	0.0177	0.104	0.089	0.4411
76903	1	34	3	3	1	1.01	20.7	1	1	499	11.2	110.6	44.5536	0.372	0.0339	0.465	0.0283	0.1117	0.196	1.26	0.536	3.0029
76921	1	64	2	1	5	0.31	41.3	1	1	186	17	37.07	10.9412	0.0078	0.0339	0.017	0.0283	0.1117	0.0177	0.0177	0.024	0.2581
76928	1	57	3	4	6	5	26.9	1	1	212	26.2	46.11	8.0916	0.063	0.0794	0.1	0.0283	0.1117	0.045	0.253	0.09	0.7704
76931	1	80	3	4	1	0.95	21	2	1	321	11.7	46.16	27.4359	0.0078	0.0794	0.017	0.0283	0.1117	0.0177	0.055	0.024	0.3409
76934	1	41	5	5	1	3.63	25	2	1	447	26.6	29.22	16.8045	0.0078	0.0339	0.017	0.0283	0.1117	0.0177	0.088	0.091	0.3954
76937	1	39	3	5	3	3.55	27.9	1	1	665	28.8	50.75	23.0903	0.089	0.0794	0.1012	0.0283	0.1117	0.0177	0.296	0.161	0.8843
76953	1	41	5	5	1	5	25.8	2	1	406	22.9	23.2	17.7293	0.0078	0.0339	0.049	0.121	0.1117	0.0177	0.302	0.264	0.9071
76954	1	48	5	4	3	1.54	30	2	1	386	33.4	25.59	11.5569	0.0078	0.0339	0.017	0.107	0.1117	0.0177	0.057	0.024	0.3761
76955	1	38	4	4	6	1.72	23.5	1	1	345	22.5	34.9	15.3333	0.02	0.0339	0.052	0.1	0.1117	0.0177	0.151	0.06	0.5463
76960	1	59	5	3	1	0.84	20.2	1	2	490	25.3	61.47	19.3676	0.23	0.0339	0.193	0.0283	0.1117	0.084	0.42	0.177	1.2779
76963	1	39	5	5	1	5	24.1	2	2	313	26.8	9.23	11.6791	0.0078	0.0339	0.017	0.754	0.1117	0.0177	0.058	0.049	1.0491
76965	1	35	5	5	1	5	30.1	1	1	539	32.5	42.77	16.5846	0.0078	0.0339	0.017	0.0283	0.1117	0.0177	0.06	0.024	0.3004
76969	1	52	3	4	1	3.81	22.7	1	1	738	30.4	67.46	24.2763	0.392	0.0339	0.531	0.0283	0.1117	0.274	1.31	0.455	3.1359
76972	1	57	1	3	1	1.65	27.9	2	2	477	28.2	40.09	16.9149	0.0078	0.0339	0.017	0.0283	0.1117	0.0177	0.1	0.084	0.4004
76975	1	53	5	4	1	2.4558	31.3	1	1	186	15.6	24.82	11.9231	0.07	0.0339	0.105	0.0283	0.1117	0.047	0.342	0.113	0.8509
76996	1	36	1	1	5	1.04	25.2	2	2	191	8.28	35.94	23.0676	0.0078	0.0339	0.017	0.0283	0.1117	0.0177	0.055	0.179	0.4504
77010	1	44	1	3	3	0.69	25.6	1	1	551.37	23.3	58.56	23.6639	0.0078	0.0339	0.043	0.055	0.1117	0.0177	0.085	0.024	0.3781
77020	1	47	3	2	1	1.81	31.2	1	1	330.5	24.7	26.99	13.3806	0.0078	0.0794	0.017	0.0283	0.1117	0.0177	0.05	0.024	0.3359
77024	1	25	4	4	1	2.94	40.5	2	1	421	28	39.66	15.0357	0.0078	0.0339	0.017	0.097	0.1117	0.0177	0.099	0.024	0.4081
77025	1	55	5	3	1	2.15	22	1	1	616	30.7	54.96	20.0651	0.097	0.0339	0.114	0.0283	0.1117	0.043	0.454	0.192	1.0739
77028	1	54	4	2	6	0.29	31.1	1	1	382	25.6	29.49	14.9219	0.0078	0.0339	0.017	19.3	0.1117	0.0177	0.108	0.053	19.6491
77035	1	64	4	4	1	2.12	26.4	1	1	230.43	27.3	52.71	8.44066	0.029	0.155	0.055	0.325	0.1117	0.0177	0.184	0.089	0.9664
77041	1	73	4	2	1	2.69	25.3	2	2	795	47	135.5	16.9149	0.0078	0.0339	0.017	13.4	0.1117	0.0177	0.063	0.024	13.6751
77047	1	28	2	3	5	3.17	26.4	1	1	580	33.8	24.35	17.1598	0.036	0.0339	0.051	0.0283	0.1117	0.0177	0.126	0.065	0.4696
77072	1	70	3	4	3	0.71	17	1	1	441	11	110.3	40.0909	0.056	0.0339	0.098	0.2	0.1117	0.042	0.266	0.12	0.9276
77076	1	35	4	5	1	3.79	33.7	2	1	660	25.1	51.16	26.2948	0.0078	0.166	0.017	0.12	0.1117	0.0177	0.077	0.045	0.5622
77095	1	46	3	4	1	5	25.7	2	1	422	24.2	54.19	17.438	0.0078	0.0339	0.017	0.0283	0.1117	0.0177	0.075	0.055	0.3464
77100	1	63	1	2	1	3.33	27.4	1	1	511.3	16.5	50.99	30.9879	0.0078	0.0339	0.017	0.1	0.1117	0.0177	0.073	0.035	0.3961
77105	1	76	3	4	1	1.23	28.8	1	1	512	32.4	74.93	15.8025	0.0078	0.0339	0.038	0.042	0.1117	0.0177	0.202	0.122	0.5751
77111	1	61	3	3	1	0.82	49.4	2	1	194.87	29.7	41.36	6.56128	0.0078	0.0339	0.017	0.664	0.1117	0.0177	0.141	0.06	1.0531
77132	1	25	5	4	5	3.33	23.2	2	1	389	19.3	26.78	20.1554	0.0078	0.0339	0.017	0.0283	0.1117	0.0177	0.06	0.024	0.3004
77140	1	58	1	4	3	3.43	28.3	1	1	284	17.7	32.48	16.0452	0.0078	0.0339	0.017	0.063	5.26	0.0177	14.7	0.702	20.8014
77147	1	45	5	3	1	2.63	27.4	1	1	284	18.5	22.79	15.3514	0.0078	0.0339	0.017	0.418	0.1117	0.0177	0.091	0.055	0.7521
77151	1	34	3	5	1	1.23	21	2	1	429.69	27.1	26.68	15.8557	0.0078	0.0339	0.017	0.0283	0.1117	0.0177	0.067	0.045	0.3284
77158	1	20	3	4	1	0.5	23.1	2	1	322	14.6	27.62	22.0548	0.0078	0.149	0.017	0.0283	0.1117	0.0177	0.086	0.147	0.5645
77160	1	52	3	5	1	1.47	57.3	2	1	138	25.9	15.03	5.32819	0.0078	0.0339	0.017	0.055	0.1117	0.0177	0.115	0.074	0.4321
77177	1	48	3	3	1	4.77	27.8	2	1	272	12.5	32.59	21.76	0.0078	0.0339	0.017	0.344	0.1117	0.0177	0.085	0.038	0.6551
77196	1	41	3	4	1	1.45	27.2	1	1	342	15.4	35.03	22.2078	0.244	0.0339	0.316	0.0283	0.1117	0.146	0.869	0.357	2.1059
77212	1	80	3	4	2	1.39	32.5	1	1	275.5	29.1	51.28	9.46735	0.0078	0.0339	0.017	0.0283	0.1117	0.0177	0.041	0.024	0.2814
77215	1	38	1	4	1	1.27	35.8	2	1	333	27.7	15.04	12.0217	0.0078	0.0794	0.017	0.0283	0.4074	0.0177	0.061	0.065	0.6836
77232	1	73	3	4	1	2.42	30	1	1	305	22.4	47.74	13.6161	0.0078	0.0339	0.017	0.0283	0.1117	0.0177	0.058	0.058	0.3324
77240	1	35	3	4	6	1.25	23.2	1	1	634	25.9	57.09	24.4788	0.294	0.0339	0.411	0.0283	0.1117	0.215	1.32	0.489	2.9029
77241	1	27	2	5	5	4.63	25.6	2	1	543	21.5	36.84	25.2558	0.0078	0.0339	0.017	0.142	0.1117	0.0177	0.029	0.024	0.3831
77246	1	68	4	5	5	1.57	24.8	2	1	459	31	40.12	14.8065	0.0078	0.0339	0.017	0.234	0.1117	0.0177	0.053	0.059	0.5341
77256	1	30	3	4	6	1.2	28.6	2	1	337	26.7	22.16	12.6217	0.0078	0.0339	0.017	0.0283	0.1117	0.0177	0.296	0.075	0.5874
77259	1	24	3	3	1	0.72	21.6	1	2	259	12.7	30.96	20.3937	0.036	0.0339	0.05	0.0283	0.1117	0.0177	0.181	0.081	0.5396
77277	1	53	3	2	1	0.98	30.4	1	1	210.76	17.5	25.25	12.0434	0.0078	0.0339	0.017	0.0283	0.1117	0.0177	0.097	0.094	0.4074
77280	1	42	3	4	6	5	25.3	1	1	330	15.2	37.07	21.7105	0.234	0.0339	0.281	0.0283	0.29	0.065	0.846	0.401	2.1792
77284	1	65	3	4	1	3.93	22.8	1	1	416.49	32.1	46.69	12.9748	0.02	0.0339	0.1012	0.0283	0.1117	0.0177	0.103	0.066	0.4818
77300	1	24	2	4	5	2.4558	31.9	2	1	335.99	19.6	28.87	17.1423	0.016	0.0339	0.15	2.66	0.1117	0.0177	0.426	0.205	3.6203
77302	1	23	3	4	5	2.74	23	2	1	396	20	26.21	19.8	0.0078	0.0339	0.017	0.0283	0.1117	0.0177	0.089	0.071	0.3764
77314	1	76	4	4	1	3.03	42	2	1	206	33.8	57.01	6.09467	0.0078	0.0339	0.017	0.0283	0.1117	0.0177	0.043	0.047	0.3064
77332	1	36	3	3	5	1.11	44.8	2	2	312	26.1	24.89	11.954	0.0078	0.0339	0.017	0.8817	0.1117	0.0177	0.051	0.039	1.1598
77336	1	48	4	3	3	2.57	29.1	2	1	460	35.8	40.48	12.8492	0.0078	0.0794	0.017	23.8	0.1117	0.0177	0.114	0.1	24.2476
77346	1	30	2	5	1	1.97	39.9	2	1	241	24.9	18.73	9.67871	0.0078	0.0339	0.017	0.0283	0.1117	0.0177	0.038	0.024	0.2784
77348	1	78	3	5	1	5	25.5	1	2	377	19.2	55.5	19.6354	0.0078	0.0339	0.017	0.0283	0.1117	0.0177	0.051	0.059	0.3264
77377	1	36	1	3	6	2.4558	34.9	2	1	321	23.8	16.76	13.4874	0.0078	0.0339	0.142	0.258	0.1117	0.0177	0.026	0.024	0.6211
77381	1	28	3	3	6	1.22	24.7	1	1	612	25.2	42.23	24.2857	0.234	0.0339	0.406	0.8817	0.1117	0.176	1.02	0.438	3.3013
77383	1	80	4	3	1	3.07	20.7	2	1	439.85	22.9	69.71	19.2074	0.0078	0.0339	0.017	0.041	0.1117	0.0177	0.055	0.04	0.3241
77387	1	44	3	2	1	2.54	27.9	1	1	315	9.55	39.71	32.9843	0.196	0.0339	0.77	0.0283	0.1117	0.119	0.826	0.27	2.3549
77398	1	62	2	1	4	1.36	25.9	1	2	657	42.5	55.93	15.4588	0.122	0.0339	0.341	0.0283	0.1117	0.086	0.657	0.226	1.6059
77400	1	80	3	3	1	2.03	28.5	2	1	301	26.2	43.99	11.4885	0.0078	0.0339	0.017	0.0283	0.1117	0.0177	0.056	0.035	0.3074
77414	1	32	1	2	1	1.27	40.2	2	1	295.44	26.1	22.48	11.3195	0.0078	0.0339	0.017	0.041	0.1117	0.0177	0.07	0.07	0.3691
77422	1	80	5	5	1	5	21.1	2	2	330	20.6	55.3	16.0194	0.0078	0.0339	0.017	1.12	0.1117	0.0177	0.075	0.047	1.4301
77423	1	74	3	2	1	0.84	27.7	1	1	119	13.7	21.59	8.68613	0.0078	0.0339	0.017	0.0283	0.1117	0.0177	0.059	0.063	0.3384
77425	1	66	4	3	2	1.75	18.6	1	1	650	27.6	82.29	23.5507	0.128	0.0339	0.345	0.0283	0.1117	0.058	0.923	0.342	1.9699
77443	1	64	3	5	1	1.28	33.1	1	1	279.72	17.3	38.19	16.1688	0.0078	0.0339	0.017	0.379	0.1117	0.0177	0.089	0.024	0.6801
77444	1	63	4	3	3	2.14	20.6	1	1	556	21	86.48	26.4762	0.071	0.0339	0.179	0.0283	0.1117	0.048	0.33	0.148	0.9499
77452	1	27	1	2	6	0.73	29.1	1	1	383	24.1	24.09	15.8921	0.0078	0.0339	0.017	0.065	0.1117	0.0177	4.5	0.071	4.8241
77458	1	50	4	4	1	2.4558	30.5	1	1	179.19	16.2	18	11.0611	0.157	0.0339	0.316	4.11	0.1117	0.114	0.81	0.27	5.9226
77468	1	54	4	4	1	1.33	29.3	1	1	516.67	34.1	60.21	15.1516	0.0078	0.0339	0.017	0.0283	0.1117	0.0177	0.073	0.024	0.3134
77475	1	48	3	4	1	5	29.5	2	1	517.93	37.4	42.21	13.8484	0.0078	0.0339	0.017	0.0283	0.836	0.0177	0.121	0.159	1.2207
77483	1	45	3	3	1	0.88	25.6	1	1	620	25.3	45.63	24.5059	0.251	0.0339	0.532	0.0283	0.1117	0.195	1.2	0.473	2.8249
77484	1	40	5	1	1	0.16	24.1	1	1	513	24.8	37.38	20.6855	0.068	0.0339	0.088	0.235	0.1117	0.028	0.312	0.111	0.9876
77492	1	34	4	3	6	1.26	32.7	1	1	509	30.1	42.6	16.9103	0.075	0.0339	0.113	0.145	0.1117	0.043	0.345	0.134	1.0006
77494	1	80	3	5	1	1.88	25.4	2	2	154	15.7	63.17	9.80892	0.0078	0.0339	0.017	0.0283	0.1117	0.0177	0.129	0.068	0.4134
77503	1	59	3	5	5	0.01	28.1	1	1	345	26.2	35.93	13.1679	0.0078	0.0339	0.017	0.051	0.1117	0.0177	0.144	0.153	0.5361
77511	1	80	4	1	2	0.86	37.4	1	1	219	23.4	44.93	9.35897	0.0078	0.0339	0.017	0.0283	0.1117	0.0177	0.118	0.083	0.4174
77513	1	34	2	4	4	2.44	24.7	1	1	1016.01	46.7	62.8	21.7561	0.032	0.0339	0.1012	0.149	0.1117	0.0177	0.157	0.086	0.6885
77521	1	41	3	4	1	4.88	27.9	2	1	257.57	17.3	32.46	14.8884	0.0078	0.0794	0.017	0.0283	0.1117	0.0177	0.068	0.024	0.3539
77535	1	72	5	5	1	3.48	23.7	2	1	308	10.9	50.06	28.2569	0.0078	0.0339	0.017	4.38	0.1117	0.0177	0.058	0.045	4.6711
77541	1	60	3	5	1	5	24.7	2	1	745	19.8	109.4	37.6263	0.0078	0.0339	0.017	0.0283	0.1117	0.0177	0.048	0.024	0.2884
77542	1	42	3	3	6	1.01	31.7	1	1	452	32.4	37.46	13.9506	0.241	0.0339	0.434	0.0283	0.1117	0.137	1.01	0.356	2.3519
77572	1	57	3	5	1	5	24.5	2	1	398	28.4	35.97	14.0141	0.0078	0.0339	0.017	0.0283	0.1117	0.0177	0.09	0.056	0.3624
77578	1	45	1	2	1	1.5	30	2	1	234	16.2	29.8	14.4444	0.0078	0.0339	0.017	0.0283	0.1117	0.0177	0.051	0.024	0.2914
77585	1	36	1	3	6	1.57	40.1	1	1	599.89	18.1	62.84	33.1431	0.0078	0.0794	0.017	2.23	0.1117	0.0177	0.05	0.057	2.5706
77586	1	65	3	5	1	5	24	2	1	237.74	14.2	43.33	16.7423	0.0078	0.051	0.017	0.0283	0.1117	0.0177	0.186	0.133	0.5525
77598	1	79	3	5	2	1.49	20.9	1	1	313	27.8	74.92	11.259	0.0078	0.0339	0.017	0.0283	0.1117	0.0177	0.0177	0.024	0.2581
77601	1	42	3	5	1	3.79	35.3	2	1	323	29.4	36.71	10.9864	0.0078	0.049	0.017	0.0283	0.1117	0.0177	0.041	0.024	0.2965
77612	1	22	2	4	5	4.67	56.7	2	1	189	44.7	34.28	4.22819	0.052	0.0339	0.058	0.0283	0.1117	0.0177	0.177	0.096	0.5746
77640	1	46	4	2	1	2.1	22.4	1	1	552	36.4	28.89	15.1648	0.267	0.0339	0.628	2.12	0.4074	0.206	1.36	0.499	5.5213
77644	1	60	3	4	1	5	29.9	1	1	409	17.4	37.85	23.5057	0.0078	0.0339	0.017	0.0283	0.1117	0.0177	0.062	0.024	0.3024
77647	1	68	2	4	1	5	30.4	2	1	604.82	35	125.1	17.2806	0.0078	0.0339	0.017	0.134	0.1117	0.0177	0.119	0.103	0.5441
77656	1	40	3	3	1	2.54	25.2	1	1	492	45.3	27.45	10.8609	0.128	0.0339	0.19	4.59	0.1117	0.065	0.493	0.189	5.8006
77675	1	33	5	5	1	5	20.6	2	1	670	29.9	36.67	22.408	0.0078	0.0339	0.017	0.092	0.1117	0.0177	0.191	0.024	0.4951
77678	1	34	3	5	6	4.28	22.7	2	1	373	14	36.75	26.6429	0.0078	0.0339	0.017	0.0283	0.1117	0.0177	0.038	0.024	0.2784
77679	1	29	3	3	5	2.27	54	2	1	353	32.9	28.09	10.7295	0.0078	0.0339	0.017	0.337	0.1117	0.0177	0.038	0.024	0.5871
77705	1	63	3	5	1	5	23.9	1	1	437	17.3	47.09	25.2601	0.0078	0.0339	0.144	0.084	0.1117	0.0177	0.05	0.024	0.4731
77716	1	20	3	4	5	2.6	25	2	1	612	22.8	57.11	26.8421	0.0078	0.0339	0.017	0.0283	0.1117	0.0177	0.068	0.061	0.3454
77720	1	34	1	2	1	0.42	37.2	1	1	263	21	29.91	12.5238	0.028	0.0339	0.045	0.099	0.1117	0.0177	0.127	0.149	0.6113
77721	1	46	5	4	1	3.07	21.2	1	1	389	18.2	30.55	21.3736	0.0078	0.0339	0.017	2.7	0.1117	0.0177	0.296	0.1668	3.3509
77722	1	80	3	3	1	1.55	29	1	1	224.15	25.2	30.9	8.89484	0.0078	0.0339	0.017	0.373	0.1117	0.0177	0.047	0.041	0.6491
77729	1	67	4	2	1	2.54	38.4	1	1	268	38.9	54.22	6.88946	0.0078	0.0339	0.017	3.23	0.1117	0.0177	0.048	0.024	3.4901
77733	1	65	1	1	1	1.29	31.8	1	1	140.19	16.5	38.07	8.49636	0.0078	0.0339	0.017	0.0283	0.1117	0.0177	2.57	1.2	3.9864
77736	1	58	4	3	1	2.06	27.9	1	1	570.24	15.4	53.47	37.0286	0.047	0.0339	0.107	0.224	0.1117	0.0177	0.322	0.125	0.9883
77745	1	33	4	4	1	5	25.8	1	1	337	21.5	17.89	15.6744	0.146	0.0339	0.183	0.049	0.1117	0.059	0.429	0.198	1.2096
77746	1	36	3	4	6	1.13	23.6	1	1	557	29.4	46.91	18.9456	0.015	0.0339	0.034	0.0283	0.1117	0.0177	0.132	0.09	0.4626
77747	1	27	4	3	5	2.4558	20.1	1	1	814	35.2	52.82	23.125	0.146	0.0339	0.236	0.0283	0.1117	0.12	0.661	0.268	1.6049
77750	1	59	4	4	3	5	41.3	2	2	295	26.6	31.83	11.0902	0.0078	0.0339	0.017	0.0283	0.1117	0.0177	0.0177	0.051	0.2851
77756	1	55	1	2	1	3.5	39.8	2	1	258	23.9	34.3	10.795	0.0078	0.0339	0.017	0.085	0.1117	0.0177	0.051	0.076	0.4001
77768	1	62	2	1	3	4.35	26.3	1	1	342.74	18.8	92.36	18.2309	0.0078	0.0339	0.017	0.052	0.1117	0.0177	0.075	0.067	0.3821
77780	1	50	4	4	6	3.37	24.4	2	1	668	29.5	39.18	22.6441	0.0078	0.0339	0.017	0.166	0.1117	0.0177	0.058	0.108	0.5201
77801	1	33	2	1	5	0.31	24.6	2	1	766	18.5	60.69	41.4054	0.0078	0.0339	0.017	0.0283	0.1117	0.0177	0.077	0.05	0.3434
77803	1	51	5	2	1	0.09	21.7	1	1	327	11.9	31.27	27.479	0.157	0.0339	0.249	0.0283	0.1117	0.083	0.639	0.238	1.5399
77806	1	23	4	2	5	2.84	22.3	1	1	783	37.2	34.78	21.0484	0.161	0.0339	0.507	0.0283	8.25	0.079	0.88	0.275	10.2142
77808	1	49	3	3	1	5	41.3	1	1	172	25	19.46	6.88	0.0078	0.0339	0.017	0.409	0.1117	0.0177	0.039	0.024	0.6601
77811	1	55	5	5	1	3.03	24.6	1	1	449	20.8	41	21.5865	0.029	0.0339	0.047	0.118	0.1117	0.0177	0.161	0.056	0.5743
77844	1	20	3	4	5	1.33	26.2	1	1	295	22.8	21.71	12.9386	0.167	0.0339	0.781	0.0283	0.1117	0.18	1.1	0.307	2.7089
77847	1	61	4	3	1	1.27	43.3	1	1	342	37.6	68.31	9.09574	0.043	0.0339	0.088	0.832	0.1117	0.033	0.221	0.1	1.4626
77851	1	45	1	4	1	3.93	29.8	1	1	278	18.7	34.28	14.8663	0.029	0.0339	0.052	0.0283	0.1117	0.0177	0.178	0.076	0.5266
77855	1	23	5	5	5	0.01	23.9	2	1	573	18.2	41.1	31.4835	0.0078	0.0339	0.017	0.534	0.1117	0.0177	0.03	0.024	0.7761
77856	1	33	5	3	5	3.66	21.3	1	1	757.83	24.1	60.3	31.4452	0.0078	0.0339	0.017	0.041	0.1117	0.0177	0.03	0.024	0.2831
77864	1	40	4	3	1	2.37	31.4	1	1	649	21.9	47.23	29.6347	0.036	0.0339	0.074	0.0283	0.1117	0.034	0.149	0.06	0.5269
77865	1	38	3	3	6	1.13	20.8	1	1	368	16.5	33.71	22.303	0.237	0.0794	0.313	0.0283	0.4074	0.163	0.793	0.28	2.3011
77870	1	76	1	1	1	0.77	27	1	1	390	22.1	40.39	17.6471	0.06	0.0339	0.061	54.5	0.1117	0.026	0.266	0.445	55.5036
77880	1	63	1	4	1	2.9	28.1	2	1	521	43.9	60.62	11.8679	0.0078	0.0339	0.017	0.0283	0.1117	0.0177	0.067	0.024	0.3074
77888	1	75	5	5	1	2.58	20.8	2	2	535	20.7	103.6	25.8454	0.0078	0.0339	0.036	0.088	0.1117	0.0177	0.202	0.15	0.6471
77892	1	80	3	3	1	3.46	25.5	1	1	287	15.2	44.61	18.8816	0.0078	0.0339	0.017	0.055	0.1117	0.0177	0.078	0.12	0.4411
77893	1	24	5	3	5	0.56	27.4	2	1	393	25.7	14.22	15.2918	0.0078	0.0339	0.017	0.051	0.1117	0.0177	0.04	0.024	0.3031
77898	1	40	4	4	6	0.84	28.8	2	1	219	15.6	29.33	14.0385	0.0078	0.0339	0.017	0.512	0.1117	0.0177	0.075	0.047	0.8221
77906	1	61	4	2	3	0.6	27.9	1	2	514	26.7	85.48	19.2509	0.289	0.0794	0.409	0.399	0.1117	0.168	0.98	0.291	2.7271
77910	1	58	3	5	3	1.11	29.9	1	1	324	20.8	24.54	15.5769	0.132	0.145	0.339	0.0283	0.1117	0.115	0.908	0.3	2.079
77930	1	43	3	4	6	5	34.7	2	1	382	30.7	34.36	12.443	0.0078	0.0339	0.017	0.048	0.1117	0.0177	0.033	0.024	0.2931
77931	1	36	2	3	1	2.4558	30.8	1	1	532.51	23.7	31.73	22.4688	0.043	0.0339	0.111	0.117	0.1117	0.031	0.461	0.21	1.1186
77941	1	50	4	3	4	0.51	34.8	1	1	418	33.5	45.44	12.4776	0.08	0.0794	0.1012	0.056	0.1117	0.117	0.296	0.407	1.2483
77959	1	44	1	4	5	1.64	39.1	1	1	928	67.2	119.7	13.8095	0.028	0.0339	0.061	7.94	0.1117	0.0177	0.174	0.1	8.4663
77965	1	47	4	4	1	2.58	39.9	2	2	426	49.3	44.09	8.64097	0.0078	0.0339	0.049	0.0283	0.1117	0.0177	0.077	0.056	0.3814
77966	1	64	2	4	6	1.93	28	1	1	648.33	32.7	92.56	19.8266	0.07	0.0339	0.124	0.0283	0.1117	0.038	0.363	0.202	0.9709
77972	1	35	3	4	1	3.18	26.6	1	1	438.09	27.8	24.26	15.7586	0.0078	0.0339	0.1012	0.0283	0.1117	0.0177	0.114	0.081	0.4956
77973	1	57	4	1	3	0.44	34.9	1	1	640	29.71	71.23	21.5416	0.0078	0.0339	0.083	0.197	0.1117	0.0177	0.299	0.198	0.9481
77983	1	65	4	4	5	0.93	25.1	2	1	218	19.5	25.55	11.1795	0.0078	0.0339	0.017	0.0283	0.1117	0.0177	0.066	0.024	0.3064
77989	1	53	2	2	1	0.95	33.6	1	1	475	28.3	82.64	16.7845	0.258	0.0339	0.432	3.79	0.1117	0.17	3.39	0.518	8.7036
77992	1	76	3	4	1	2.42	24.3	1	1	284	21.3	35.44	13.3333	0.0078	0.0339	0.017	0.0283	0.1117	0.0177	0.103	0.231	0.5504
77994	1	64	1	4	1	0.72	50.6	1	1	343	70.1	22.93	4.89301	0.0078	0.0339	0.017	0.0283	0.1117	0.0177	0.173	0.038	0.4274
77995	1	20	2	4	5	2.27	40.2	2	1	288	24.1	15.29	11.9502	0.0078	0.0339	0.017	0.696	0.1117	0.0177	0.039	0.024	0.9471
78004	1	23	3	5	5	5	35	2	1	219	21.3	12.54	10.2817	0.0078	0.0339	0.017	0.0283	0.1117	0.0177	0.083	0.037	0.3364
78010	1	73	5	2	1	0.67	20.1	1	1	414	29.4	61.59	14.0816	0.086	0.0339	0.115	0.0283	0.1117	0.044	0.402	0.296	1.1169
78012	1	33	3	5	1	2.36	30.4	1	1	253	20.7	20.1	12.2222	0.0078	0.0339	0.1012	0.045	0.1117	0.0177	0.296	0.093	0.7063
78015	1	47	1	3	4	0.28	30.4	1	1	551	18.6	39.94	29.6237	0.0078	0.0339	0.017	0.0283	0.1117	0.0177	0.123	0.073	0.4124
78019	1	65	1	1	1	1.87	30.5	1	1	622	41.9	58.38	14.8449	0.0078	0.0339	0.017	0.0283	0.1117	0.0177	0.132	0.065	0.4134
78028	1	64	1	4	5	5	26.8	1	1	353	27.1	50.02	13.0258	0.035	0.0339	0.055	0.0283	0.1117	0.0177	0.201	0.111	0.5936
78043	1	61	3	3	1	4.32	45	1	1	167	15.4	76.77	10.8442	0.076	0.0339	0.116	0.0283	0.1117	0.056	0.281	0.107	0.8099
78048	1	43	5	4	1	4.25	25.3	2	1	432	20.9	48.08	20.6699	0.0078	0.0794	0.017	0.0283	0.4074	0.0177	0.085	0.06	0.7026
78070	1	46	3	3	1	1.47	23.9	1	1	456	23.7	53.87	19.2405	0.091	0.0339	0.164	0.489	0.1117	0.074	0.537	0.137	1.6376
78080	1	58	5	5	5	5	28.3	2	1	364	41.3	26.49	8.81356	0.0078	0.0339	0.017	0.0283	0.1117	0.0177	0.084	0.062	0.3624
78082	1	40	3	5	3	5	22.3	2	1	641.66	25.9	61.21	24.7745	0.0078	0.0339	0.017	0.0283	0.1117	0.0177	0.07	0.024	0.3104
78083	1	53	3	3	3	0.04	20.7	1	1	647.25	21.6	102.3	29.9653	0.169	6.26	0.495	0.0283	0.1117	0.094	1.53	0.559	9.247
78088	1	66	4	4	5	1.22	21.5	1	1	577.81	25.5	88.55	22.6592	0.104	0.0339	0.16	0.069	0.1117	0.08	0.345	0.13	1.0336
78089	1	62	2	3	5	2.43	29.1	1	1	332	17.9	57.06	18.5475	0.0078	0.0339	0.017	0.302	0.1117	0.0177	0.041	0.024	0.5551
78096	1	28	3	4	1	2.02	46.2	1	1	204	21.4	10.65	9.53271	0.035	0.0339	0.057	0.0283	0.1117	0.0177	0.21	0.1	0.5936
78099	1	72	3	3	2	0.76	32.5	2	1	354	22	54.99	16.0909	0.0078	0.0339	0.033	0.0283	0.1117	0.0177	0.07	0.024	0.3264
78100	1	80	4	3	2	0.84	25.5	2	1	332	19.7	56.4	16.8528	0.0078	0.0339	0.017	0.0283	0.1117	0.0177	0.159	0.093	0.4684
78103	1	63	2	1	1	2.4558	24.2	1	1	766	35.6	73.17	21.5169	0.192	0.0339	0.245	0.043	0.1117	0.077	0.747	0.292	1.7416
78104	1	61	1	1	1	0.69	32.6	2	1	412	24.9	46.9	16.5462	0.0078	0.0339	0.017	0.0283	0.1117	0.0177	0.057	0.101	0.3744
78111	1	32	3	2	1	0.51	19.7	2	1	394	8.86	53.42	44.4695	0.0078	0.0794	0.017	0.0283	0.1117	0.0177	0.0177	0.024	0.3036
78127	1	67	5	3	1	3.81	24.9	1	1	331	19.6	37.61	16.8878	0.0078	0.205	0.017	0.123	0.1117	0.0177	0.046	0.024	0.5522
78131	1	80	3	3	1	2.67	28.4	1	1	236	12.9	53.6	18.2946	0.0078	0.0339	0.017	0.343	0.1117	0.0177	0.052	0.045	0.6281
78138	1	66	3	4	1	4.77	25.3	2	1	250	25.4	28.31	9.84252	0.0078	0.0339	0.029	0.0283	0.1117	0.0177	0.225	0.179	0.6324
78146	1	33	3	3	5	0	48.2	1	1	298	48.8	39.31	6.10656	0.077	0.0339	0.077	0.229	0.1117	0.034	0.302	0.142	1.0066
78174	1	67	1	2	3	3.5	27.1	2	1	598	30.7	52.64	19.4788	0.0078	0.0339	0.017	0.0283	0.1117	0.0177	0.1	0.053	0.3694
78191	1	26	3	2	1	0.53	20	1	1	665	14.2	58.27	46.831	0.353	2.7	0.441	0.0283	0.1117	0.186	1.2	0.54	5.56
78193	1	33	1	3	1	2.82	32.3	2	1	589.2	35.2	35.44	16.7386	0.0078	0.0339	0.017	2.08	0.1117	0.0177	0.04	0.024	2.3321
78213	1	38	4	2	1	4.16	20.9	1	1	281	21.4	30.23	13.1308	0.263	0.0339	0.444	0.171	1.86	0.107	1.01	0.273	4.1619
78221	1	30	3	4	6	0.36	25.5	1	1	167	14.4	15.51	11.5972	0.0078	0.0339	0.017	0.0283	0.263	0.0177	0.104	0.081	0.5527
78235	1	64	5	5	1	0.64	17.7	2	1	695	24.5	102.7	28.3673	0.0078	0.0339	0.017	0.074	0.1117	0.0177	0.044	0.024	0.3301
78237	1	39	1	2	1	0.95	33.4	2	1	381	18.9	24.24	20.1587	0.0078	0.0339	0.017	0.0283	0.1117	0.0177	0.09	0.077	0.3834
78270	1	55	5	4	1	5	27.5	2	1	231	18.6	11.8	12.4194	0.0078	0.0794	0.017	0.0283	0.4074	0.0177	0.05	0.037	0.6446
78296	1	59	2	5	4	5	29.3	1	1	762	33.9	103.2	22.4779	0.0078	0.0339	0.017	0.044	0.1117	0.0177	0.048	0.024	0.3041
78299	1	38	4	2	4	0.51	64.3	2	1	332	59.5	45.1	5.57983	0.0078	0.0794	0.1012	0.118	0.1117	0.0177	0.296	0.049	0.7808
78301	1	75	3	2	1	1.93	34.2	1	2	224	19.1	20.82	11.7277	0.0078	0.0794	0.1012	0.041	0.1117	0.0177	0.296	0.157	0.8118
78322	1	29	5	5	1	0.56	28.1	2	1	218	22.5	18.44	9.68889	0.0078	0.0339	0.017	0.057	0.1117	0.0177	0.078	0.024	0.3471
78323	1	55	1	1	1	0.96	26.7	2	2	459	23.4	44.57	19.6154	0.0078	0.0339	0.017	0.0283	0.1117	0.0177	0.554	0.075	0.8454
78328	1	66	5	2	1	0.93	26.9	1	1	389	21.9	46.61	17.7626	0.161	0.0339	0.379	0.0283	0.1117	0.122	1.1	0.432	2.3679
78329	1	22	3	4	5	1.29	22.6	1	1	756	32	30.28	23.625	0.0078	0.0339	0.017	0.0283	0.1117	0.0177	0.296	0.058	0.5704
78354	1	44	3	4	3	1.24	19	1	1	167	6.92	52.06	24.1329	0.173	0.0339	0.327	0.0283	0.1117	0.083	0.775	0.277	1.8089
78362	1	52	3	4	1	4.86	43.7	1	1	231	37	27.66	6.24324	0.0078	0.0339	0.017	0.0283	0.1117	0.0177	0.296	0.088	0.6004
78367	1	30	3	3	6	0.93	23.9	1	1	341	9.21	40.69	37.025	0.157	0.0339	0.227	0.251	0.1117	0.076	0.65	0.253	1.7596
78368	1	52	3	5	4	4.28	25.5	2	1	561	26	47.08	21.5769	0.0078	0.0339	0.017	0.0283	0.1117	0.0177	0.041	0.05	0.3074
78369	1	23	3	4	1	1.53	20.4	2	2	521	32.4	41.13	16.0802	0.0078	0.0339	0.017	0.105	0.1117	0.0177	0.092	0.056	0.4411
78381	1	21	2	4	5	0.61	18.1	1	1	564	32.7	33.38	17.2477	0.519	0.0339	0.339	0.0283	0.1117	0.182	1.03	0.475	2.7189
78382	1	46	4	2	1	0.9	30.2	1	1	614	23.7	51.99	25.9072	0.191	0.0339	0.424	0.0283	0.1117	0.117	0.944	0.367	2.2169
78391	1	55	5	3	1	3.14	25.7	1	1	374	19.2	29.92	19.4792	0.094	0.0339	0.177	0.056	0.1117	0.05	0.507	0.197	1.2266
78404	1	44	3	3	5	5	34.5	1	1	350	22.3	34.03	15.6951	0.0078	0.0339	0.017	1.83	0.1117	0.0177	0.074	0.04	2.1321
78411	1	41	5	3	1	1.56	26.9	1	2	315	16.5	29.74	19.0909	0.076	0.0339	0.075	0.0283	0.1117	0.0177	0.236	0.1	0.6786
78420	1	44	5	4	3	5	30	1	1	265	14.3	21.35	18.5315	0.0078	0.0794	0.1012	0.0283	0.1117	0.0177	0.296	0.063	0.7051
78445	1	63	3	5	1	3.81	25.6	1	1	694	23.5	76.24	29.5319	0.0078	0.0339	0.017	0.0283	0.1117	0.0177	0.194	0.136	0.5464
78460	1	32	4	4	1	3.65	25.5	2	2	785	40	40.68	19.625	0.0078	0.0339	0.017	0.8817	0.1117	0.0177	0.059	0.048	1.1768
78462	1	58	4	5	3	1.63	31	1	1	387	21.8	53.05	17.7523	0.0078	0.0339	0.017	0.0283	0.1117	0.0177	0.065	0.05	0.3314
78478	1	47	3	4	1	3.56	30.6	2	2	284	30.1	28.19	9.43522	0.0078	0.334	0.017	0.077	0.1117	0.0177	0.031	0.024	0.6202
78490	1	23	4	2	5	0.69	15.4	2	1	584	17.9	47.71	32.6257	0.0078	0.0339	0.017	0.18	0.1117	0.0177	0.084	0.024	0.4761
78497	1	64	4	3	1	3.22	24	1	1	366.56	19.8	37.03	18.5131	0.0078	0.05	0.017	16.7	0.1117	0.0177	0.262	0.066	17.2322
78500	1	36	4	4	6	2.61	30.7	2	1	314.08	31.3	30.08	10.0345	0.0078	0.0339	0.017	2.78	0.1117	0.0177	0.1	0.068	3.1361
78506	1	57	3	4	3	0.73	23.6	1	1	607.99	16.5	105.7	36.8479	0.124	0.0339	0.21	0.491	0.1117	0.059	0.506	0.156	1.6916
78512	1	31	3	2	5	0.61	22	1	1	633.71	21.6	63.21	29.3384	0.206	0.0339	0.558	0.0283	0.1117	0.142	1.28	0.516	2.8759
78514	1	45	4	3	3	0.07	23.3	1	1	623	21.6	76.58	28.8426	0.262	0.0339	0.551	0.0283	0.1117	0.213	1.02	0.324	2.5439
78521	1	70	5	3	1	1.56	30.9	1	2	340	22.3	39.31	15.2466	0.0078	0.0339	0.017	0.0283	0.1117	0.0177	0.068	0.07	0.3544
78528	1	38	3	4	3	5	25.8	1	1	1250	15.4	13.7	81.1688	0.021	0.0339	0.035	0.117	0.1117	0.0177	0.106	0.041	0.4833
78549	1	20	3	3	6	2.02	21.1	1	1	301	9.68	26.74	31.095	0.216	0.0339	0.299	0.0283	0.1117	0.136	0.778	0.322	1.9249
78560	1	22	4	4	5	0.63	20.4	1	1	339	20.9	26.34	16.2201	0.108	0.0339	0.573	0.0283	0.1117	0.152	1.19	0.415	2.6119
78561	1	80	3	3	1	1.93	27.4	2	1	144.9	16.9	230.8	8.57396	0.0078	0.0339	0.017	0.0283	0.1117	0.0177	0.065	0.051	0.3324
78562	1	48	3	3	1	1.82	35.3	1	1	505	32.4	34.93	15.5864	0.015	0.0339	0.017	0.0283	0.1117	0.0177	0.124	0.111	0.4586
78572	1	51	3	5	2	3.68	28.3	2	1	369	24.4	27.68	15.123	0.0078	0.0339	0.017	0.081	0.1117	0.0177	0.061	0.045	0.3751
78575	1	22	3	5	5	0.06	28.5	1	1	428	26.6	26.21	16.0902	0.0078	0.0339	0.035	0.0283	0.1117	0.0177	0.102	0.08	0.4164
78577	1	22	3	2	5	2.4558	23.8	1	2	380	12.6	32.38	30.1587	0.064	0.0339	0.114	0.0283	0.1117	0.036	0.242	0.094	0.7239
78595	1	31	5	4	1	2.1	38.6	1	1	197	32.8	24.79	6.0061	0.028	0.0339	0.046	0.068	0.1117	0.0177	0.135	0.073	0.5133
78597	1	61	1	1	1	2.4558	25.7	1	1	397	22	41.55	18.0455	0.031	0.061	0.068	0.0283	0.1117	0.0177	0.291	0.204	0.8127
78598	1	63	3	2	5	1.27	31.6	2	2	371	19.7	45.79	18.8325	0.0078	0.0339	0.017	0.077	0.1117	0.0177	0.03	0.024	0.3191
78599	1	36	3	4	1	5	35.7	1	1	316	23.4	23.11	13.5043	0.0078	0.0339	0.017	0.0283	0.1117	0.0177	0.116	0.085	0.4174
78608	1	59	3	4	3	0.66	23.6	1	1	229	17.8	109.1	12.8652	0.115	0.0339	0.23	0.8817	0.1117	0.08	0.593	0.266	2.3113
78611	1	21	4	4	5	3.49	23.1	2	1	480	25.1	45.24	19.1235	0.0078	0.0339	0.017	0.133	0.1117	0.0177	0.21	0.25	0.7811
78620	1	64	5	1	1	0.51	28.4	2	2	281	27.3	26.97	10.293	0.0078	0.0339	0.017	0.117	0.1117	0.0177	0.082	0.046	0.4331
78621	1	50	5	5	1	3.03	26.4	2	2	226	15.4	30.38	14.6753	0.0078	0.0339	0.017	0.09	0.1117	0.0177	0.04	0.024	0.3421
78640	1	66	2	3	1	2.03	26.2	1	1	559	28.6	62.93	19.5455	0.0078	0.0794	0.017	0.0283	0.1117	0.0177	0.075	0.049	0.3859
78650	1	21	5	5	5	5	21.2	1	1	862	21.7	59.56	39.7235	0.013	0.0339	0.017	0.0283	0.1117	0.0177	0.131	0.043	0.3956
78655	1	28	1	4	5	1.97	29.2	1	1	352	16.5	19.2	21.3333	0.016	0.0339	0.039	0.062	0.1117	0.0177	0.131	0.066	0.4773
78661	1	64	4	4	1	0.94	21.4	1	1	579	33.5	71.33	17.2836	0.044	0.0794	0.071	0.109	0.1117	0.04	0.231	0.124	0.8101
78662	1	56	4	4	5	4.28	28.2	2	1	214	16.8	22.53	12.7381	0.0078	0.0339	0.017	0.0283	0.1117	0.0177	0.051	0.039	0.3064
78664	1	37	3	3	1	1.26	25.7	2	1	330	22.8	21.36	14.4737	0.0078	0.0339	0.017	0.062	0.1117	0.0177	0.06	0.082	0.3921
78688	1	39	1	3	5	2.63	36.2	2	1	417.27	2.117	36.15	197.104	0.0078	0.0339	0.017	0.0283	0.1117	0.0177	0.061	0.064	0.3414
78695	1	23	4	5	6	0.87	28.4	2	1	584.15	25.1	39.97	23.2729	0.0078	0.0339	0.017	0.105	0.1117	0.0177	0.14	0.024	0.4571
78700	1	80	3	5	1	2.9	22	1	1	75.08	6.82	67.68	11.0088	0.0078	0.0339	0.017	0.079	0.1117	0.0177	0.042	0.024	0.3331
78703	1	59	3	5	1	5	23.5	2	1	502	30.3	34.21	16.5677	0.0078	0.0339	0.017	0.045	0.1117	0.0177	0.035	0.024	0.2921
78704	1	55	4	2	5	1.04	32	1	1	210	11.1	40.27	18.9189	0.054	0.0339	0.16	0.0283	0.1117	0.053	0.39	3.88	4.7109
78707	1	56	4	2	5	0.57	19.6	1	1	833	29.2	132.6	28.5274	0.098	0.0339	0.19	0.0283	0.1117	0.048	0.454	0.199	1.1629
78724	1	23	3	3	5	2.06	25.1	1	1	506	28	34.37	18.0714	0.115	0.564	0.173	0.0283	0.1117	0.078	0.401	0.173	1.644
78725	1	35	3	2	1	0.43	29	1	1	399	31.4	31.01	12.707	0.137	0.0339	0.363	0.0283	0.1117	0.114	0.844	0.32	1.9519
78735	1	44	3	4	1	5	30.2	2	1	350	24.9	25.1	14.0562	0.0078	0.072	0.017	0.0283	0.1117	0.0177	0.056	0.053	0.3635
78736	1	41	3	4	1	4.19	50.9	1	1	439	42.9	55.31	10.2331	0.072	0.0339	0.096	0.0283	0.1117	0.03	0.314	0.156	0.8419
78748	1	77	3	3	1	3.35	27.2	1	1	474.2	21.8	54.75	21.7523	0.0078	0.0339	0.017	0.0283	0.1117	0.0177	0.064	0.051	0.3314
78762	1	24	2	3	4	0.49	33.4	1	1	303	32.7	21.21	9.26606	0.0078	0.0339	0.017	0.043	0.1117	0.0177	0.076	0.036	0.3431
78766	1	46	3	4	1	3.48	26.8	2	1	529	27.7	47.96	19.0975	0.0078	0.0339	0.017	0.0283	0.1117	0.0177	0.124	0.088	0.4284
78776	1	24	3	5	5	5	25	1	1	419	17.6	35.22	23.8068	0.0078	0.0339	0.017	0.091	0.1117	0.0177	0.049	0.041	0.3691
78781	1	29	4	3	6	0.83	29.4	2	1	581	38.4	43.61	15.1302	0.0078	0.0339	0.081	0.0283	0.1117	0.0177	0.227	0.136	0.6434
78794	1	60	5	4	1	1.55	20.7	2	1	212.89	13	26.89	16.3762	0.0078	0.0339	0.029	0.271	0.1117	0.0177	0.073	0.044	0.5881
78797	1	37	1	2	1	3.79	26.9	2	2	402	36	29.62	11.1667	0.0078	0.0794	0.017	0.0283	0.4074	0.0177	0.033	0.024	0.6146
78812	1	41	2	3	1	2.15	34.6	2	1	318	16.5	19.18	19.2727	0.0078	0.0339	0.027	0.0283	0.1117	0.0177	0.108	0.065	0.3994
78828	1	29	5	5	1	5	29.5	1	1	262	25.3	14.69	10.3557	0.039	0.0339	0.057	0.0283	0.1117	0.0177	0.179	0.093	0.5596
78829	1	38	1	5	6	2.05	34	2	1	282	16.1	27.12	17.5155	0.0078	0.0339	0.017	0.0283	0.1117	0.0177	0.058	0.049	0.3234
78832	1	32	4	5	1	4.93	27.4	2	1	614	21.9	60.52	28.0365	0.0078	0.0339	0.017	0.0283	0.1117	0.0177	0.041	0.024	0.2814
78838	1	78	3	5	1	1.77	25.9	1	1	343.11	17.1	59.25	20.0649	0.0078	0.0339	0.017	0.042	0.1117	0.0177	0.035	0.039	0.3041
78852	1	40	1	2	3	2.4558	31	1	1	397	20.1	15.64	19.7512	0.0078	0.0339	0.017	0.0283	0.1117	0.0177	0.19	0.123	0.5294
78854	1	67	4	5	1	2.02	30.9	1	1	228	27.4	39.02	8.32117	0.0078	0.0339	0.017	0.0283	0.1117	0.0177	0.052	0.051	0.3194
78899	1	80	3	5	2	2.78	24	2	1	634	41.9	61.67	15.1313	0.0078	0.0339	0.017	0.0283	0.1117	0.0177	0.058	0.035	0.3094
78903	1	66	1	1	1	1.62	32.2	1	1	137	19.6	38.36	6.9898	0.0078	0.0339	0.017	0.0283	0.1117	0.0177	0.04	0.024	0.2804
78905	1	61	2	1	3	0.75	24.9	1	1	381	17.1	46.26	22.2807	0.0078	0.0339	0.017	0.0283	0.1117	0.0177	0.054	0.024	0.2944
78918	1	67	5	3	1	5	25.7	2	1	485	23.4	55.69	20.7265	0.0078	0.0339	0.017	0.0283	0.1117	0.0177	0.074	0.024	0.3144
78926	1	44	3	3	2	1.18	23.5	1	1	452	24.8	69.21	18.2258	0.025	0.0794	0.042	0.0283	0.1117	0.0177	0.16	0.097	0.5611
78937	1	55	3	4	5	0.26	34.2	1	1	450.23	56	47.88	8.03982	0.123	5.11	0.1012	0.0283	0.1117	0.065	0.678	0.2	6.4172
78946	1	20	4	4	5	0.7	31.1	2	2	374	39.9	10.83	9.37343	0.0078	0.0794	0.017	0.0283	0.1117	0.0177	0.0177	0.024	0.3036
78974	1	54	4	3	5	0.75	29.1	1	1	986	33.6	171.1	29.3452	0.187	0.0339	0.217	0.304	0.1117	0.11	0.646	0.298	1.9076
78983	1	52	3	5	1	5	26.1	2	1	380	14.16	45.78	26.8362	0.0078	0.0339	0.017	0.0283	0.1117	0.0177	0.048	0.024	0.2884
78987	1	30	3	5	5	1.65	24.8	1	2	555.39	17.1	35.95	32.4789	0.0078	0.0339	0.017	0.051	0.1117	0.0177	0.047	0.024	0.3101
78989	1	68	4	1	2	3.05	51.2	1	1	329.62	21.7	30.34	15.1899	0.0078	0.066	0.017	0.0283	0.1117	0.0177	0.074	0.053	0.3755
78999	1	23	4	2	5	3.1	22.8	1	1	430	21.9	33.48	19.6347	0.118	0.0339	0.261	0.0283	0.1117	0.065	0.581	0.286	1.4849
79000	1	36	1	1	1	1.81	26.8	1	1	408	10.9	24.32	37.4312	0.0078	0.0339	0.017	0.0283	0.1117	0.0177	0.059	0.061	0.3364
79016	1	80	3	5	1	4.93	27.9	1	1	507	23.7	100.2	21.3924	0.0078	0.053	0.017	0.0283	0.1117	0.0177	0.059	0.024	0.3185
79017	1	61	1	1	1	1.2	32.4	2	1	255	12.1	31.77	21.0744	0.0078	0.0339	0.017	0.066	0.1117	0.0177	0.713	1.16	2.1271
79024	1	32	4	4	1	1.45	24.8	2	2	393.9	45.2	15.68	8.7146	0.0078	0.0339	0.017	0.0283	0.1117	0.0177	0.11	0.024	0.3504
79029	1	52	3	5	1	2.4558	25.8	1	1	525	22.3	37.06	23.5426	0.0078	0.0339	0.017	1.38	0.1117	0.0177	0.038	0.024	1.6301
79032	1	33	4	2	1	2.4558	32.9	1	1	335	27.4	27.58	12.2263	0.259	0.0339	0.547	93.2	0.1117	0.139	1.3	0.495	96.0856
79033	1	41	3	3	6	3.13	25	1	1	425	12.8	16.62	33.2031	0.103	0.065	0.178	0.0283	0.1117	0.036	0.468	0.184	1.174
79064	1	48	5	5	1	1.68	28	2	1	178	9.94	17.75	17.9074	0.0078	0.0339	0.017	0.8817	0.1117	0.0177	0.064	0.049	1.1828
79067	1	26	1	2	6	1.04	31.3	1	1	384	20.2	21.59	19.0099	0.0078	0.0339	0.017	1.67	0.1117	0.0177	0.12	0.083	2.0611
79069	1	30	3	5	5	1.74	31.2	2	1	321.88	24.2	24.91	13.3008	0.0078	0.0339	0.017	0.073	0.1117	0.0177	0.039	0.024	0.3241
79075	1	27	2	3	6	1.71	33.5	2	1	308	28.3	13.52	10.8834	0.0078	0.0339	0.017	0.084	0.1117	0.0177	0.109	0.037	0.4181
79135	1	60	1	1	3	0.64	27.6	1	1	374	28.9	39.7	12.9412	0.0078	0.0339	0.017	0.0283	0.4074	0.0177	0.038	0.024	0.5741
79154	1	71	3	5	1	5	23.7	1	1	344	18	31.75	19.1111	0.0078	0.0339	0.017	0.07	0.1117	0.0177	0.068	0.055	0.3811
79162	1	80	3	5	1	5	27.6	1	1	222	20.1	68.49	11.0448	0.0078	0.0339	0.017	0.0283	0.1117	0.0177	0.053	0.046	0.3154
79164	1	33	5	5	6	5	50.2	1	1	278	32.8	24.9	8.47561	0.0078	0.0339	0.017	0.0283	0.1117	0.0177	0.072	0.063	0.3514
79175	1	21	3	4	5	1.03	23.4	1	1	753	31.2	26.41	24.1346	0.105	0.056	0.351	0.0283	0.1117	0.072	1.05	0.339	2.113
79176	1	55	4	4	1	4.64	30.1	1	1	570	50.3	56.35	11.332	0.038	0.0339	0.097	0.0283	0.1117	0.0177	0.346	0.16	0.8326
79177	1	43	3	5	6	5	26.7	2	2	482	29.2	30.69	16.5068	0.0078	0.0339	0.017	0.0283	0.1117	0.0177	0.055	0.042	0.3134
79178	1	80	5	5	5	5	26.7	2	1	585	49.1	75.3	11.9145	0.0078	0.066	0.017	0.0283	0.1117	0.0177	0.043	0.024	0.3155
79184	1	80	3	4	2	1.21	32.5	2	1	512	35.5	76.13	14.4225	0.0078	0.0339	0.017	0.257	0.1117	0.0177	0.055	0.035	0.5351
79185	1	79	4	1	3	2.09	19.1	1	2	319	19.3	48.06	16.5285	0.0078	0.0339	0.017	0.051	0.1117	0.0177	0.048	0.059	0.3461
79190	1	41	1	3	1	4.71	45.9	2	1	381	29.5	45.68	12.9153	0.0078	0.0339	0.017	0.0283	0.1117	0.0177	0.098	0.053	0.3674
79193	1	20	3	4	5	5	28.3	2	1	537	26.6	22.44	20.188	0.0078	0.0339	0.017	0.169	0.1117	0.0177	0.07	0.057	0.4841
79198	1	46	2	3	6	0.58	27.7	1	1	494.21	16.4	68.69	30.1348	0.18	0.0339	0.327	0.098	0.1117	0.106	0.707	0.243	1.8066
79220	1	55	3	3	4	1.46	31.9	2	2	501	18	60.91	27.8333	0.012	0.0339	0.299	0.0283	0.1117	0.037	0.296	0.158	0.9759
79226	1	24	5	5	5	4.1	22.1	2	2	492	18.6	19.15	26.4516	0.0078	0.0339	0.017	0.0283	0.1117	0.0177	0.147	0.117	0.4804
79228	1	42	3	4	3	1.61	19	2	2	797	24.6	96.77	32.3984	0.0078	0.0339	0.214	0.0283	0.1117	0.0177	0.259	0.124	0.7964
79231	1	52	3	5	1	5	28.5	1	1	545	26.2	47.25	20.8015	0.0078	0.162	0.017	0.0283	0.1117	0.0177	0.069	0.06	0.4735
79247	1	51	4	5	5	1.71	32	1	1	387	23.2	35.48	16.681	0.086	0.0339	0.134	0.065	0.1117	0.039	0.406	0.153	1.0286
79267	1	65	3	3	1	2.12	34.1	1	1	280	23.9	45.75	11.7155	0.0078	0.0339	0.017	0.053	0.1117	0.0177	0.06	0.059	0.3601
79292	1	58	5	2	4	4.28	26.6	1	1	447	16	37.49	27.9375	0.121	0.0339	0.206	0.0283	0.1117	0.07	0.929	0.233	1.7329
79305	1	46	3	5	1	2.4558	29	2	1	406	14.8	38.49	27.4324	0.0078	0.0339	0.017	0.0283	0.1117	0.0177	0.055	0.046	0.3174
79310	1	70	3	3	1	1.14	26.6	2	1	155	16.2	29.11	9.5679	0.0078	0.0339	0.017	0.0283	0.1117	0.0177	0.033	0.024	0.2734
79314	1	55	3	4	3	5	32	1	2	185	9.34	35.74	19.8073	0.166	0.0339	0.222	0.0283	0.1117	0.094	0.58	0.231	1.4669
79322	1	70	3	4	3	1.26	28.9	1	1	305.28	31.2	33.22	9.78462	0.0078	0.0339	0.1012	0.0283	0.1117	0.0177	0.034	0.024	0.3586
79330	1	35	5	4	6	1.02	22.6	1	1	357	17.3	41.25	20.6358	0.185	0.0339	0.286	27	0.1117	0.112	0.721	0.232	28.6816
79331	1	58	3	4	2	1.31	33.2	1	1	196	15	25.93	13.0667	0.047	0.0339	0.093	0.043	0.1117	0.029	0.285	0.117	0.7596
79338	1	44	5	5	1	5	25.4	2	1	208	16.7	29.34	12.4551	0.0078	0.0339	0.017	0.0283	0.1117	0.0177	0.082	0.046	0.3444
79351	1	62	3	3	3	5	29	1	1	239	28.6	20.63	8.35664	0.133	0.0794	0.344	0.0283	0.4074	0.073	1.61	1.01	3.6851
79358	1	67	4	5	1	5	30.8	1	2	425	26.3	45.42	16.1597	0.0078	0.0339	0.017	0.081	0.1117	0.0177	0.079	0.115	0.4631
79359	1	25	3	5	1	4.19	33.6	2	2	160.09	21.2	19.99	7.55142	0.0078	0.0794	0.017	0.0283	0.1117	0.0177	0.036	0.024	0.3219
79362	1	59	3	3	5	3.64	27.4	1	1	510	23	60.22	22.1739	0.147	0.0339	0.233	0.066	0.1117	0.103	0.743	0.31	1.7476
79365	1	29	4	4	5	2.74	33.2	2	1	338	27.5	32.24	12.2909	0.0078	0.0339	0.017	5.09	0.1117	0.0177	0.047	0.024	5.3491
79366	1	42	5	4	1	1.56	36.1	2	2	213	18.5	24.49	11.5135	0.0078	0.0339	0.017	0.0283	0.1117	0.0177	0.07	0.041	0.3274
79371	1	63	5	2	1	2.19	27.8	1	1	548	32.4	72.01	16.9136	0.167	0.0339	0.401	0.057	0.1117	0.176	1.35	0.503	2.7996
79376	1	50	3	3	5	3.86	31.7	1	1	279	29.1	27.38	9.58763	0.271	0.0339	0.443	0.966	0.1117	0.116	1.02	0.385	3.3466
79398	1	29	4	2	6	0.82	23	1	2	693.86	27	69.92	25.6985	0.0078	0.0339	0.061	0.0283	0.1117	0.0177	0.225	0.077	0.5624
79399	1	26	3	2	6	2.57	23.1	1	1	667	15.3	58.99	43.5948	0.065	0.0339	0.143	0.16	0.1117	0.043	0.35	0.134	1.0406
79417	1	80	3	5	2	4.93	25.3	2	2	478	31.9	49.49	14.9843	0.0078	0.073	0.017	0.0283	0.1117	0.0177	0.137	0.113	0.5055
79421	1	31	3	5	1	4.92	31.9	2	1	410	16	28.13	25.625	0.0078	0.0339	0.017	0.0283	0.1117	0.0177	0.051	0.054	0.3214
79431	1	56	1	3	1	0.68	29.2	2	1	323	19	31.36	17	0.0078	0.0339	0.017	0.0283	0.1117	0.0177	0.107	0.095	0.4184
79432	1	73	5	4	3	1.27	29.2	1	2	246	23.5	21.8	10.4681	0.0078	0.0339	0.017	0.0283	0.1117	0.0177	0.046	0.024	0.2864
79437	1	60	4	4	3	0.6	51.8	2	1	153	26.7	34.73	5.73034	0.0078	0.0339	0.017	0.686	0.1117	0.0177	0.053	0.054	0.9811
79442	1	45	3	4	3	2.41	26.5	2	1	512	20.4	36.02	25.098	0.0078	0.0339	0.017	0.0283	0.1117	0.0177	0.074	0.063	0.3534
79443	1	44	4	3	5	2.4558	40.7	2	1	196	18.7	36.23	10.4813	0.0078	0.0339	0.017	0.387	0.4074	0.0177	0.045	0.041	0.9568
79453	1	54	4	2	5	0	37.6	1	1	331	20.5	37.67	16.1463	0.16	0.0339	0.28	0.054	0.1117	0.122	1.85	0.412	3.0236
79457	1	68	3	4	6	3.48	30.5	1	1	310	51.1	32.3	6.06654	0.0078	0.0339	0.017	0.0283	0.1117	0.0177	0.035	0.046	0.2974
79459	1	30	5	5	1	5	31.7	1	1	316	39.5	21.55	8	0.034	0.0339	0.036	0.19	0.1117	0.0177	0.132	0.071	0.6263
79460	1	64	1	1	1	2.4558	25	1	1	556	19	77.86	29.2632	0.018	0.0339	0.042	0.0283	0.1117	0.0177	0.211	0.161	0.6236
79462	1	25	2	4	4	1.07	47.3	2	2	398	28.6	26.37	13.9161	0.0078	0.0339	0.017	2.53	0.1117	0.0177	0.064	0.045	2.8271
79463	1	33	5	5	1	5	32.4	2	2	281	29.2	29.73	9.62329	0.0078	0.0339	0.017	0.0283	0.1117	0.0177	0.127	0.05	0.3934
79469	1	80	3	5	1	5	19.7	1	1	721	26.4	108.4	27.3106	0.0078	0.0339	0.017	0.152	0.1117	0.0177	0.296	0.037	0.6731
79481	1	72	4	4	1	2.4558	26.5	2	2	333.51	17	67.95	19.6182	0.0078	0.0339	0.017	0.0283	0.1117	0.0177	0.172	0.062	0.4504
79490	1	34	3	3	5	0.08	29.8	2	1	359	42.8	32.03	8.38785	0.0078	0.0339	0.017	0.0283	0.1117	0.0177	0.029	0.024	0.2694
79507	1	24	4	3	5	2.4558	33.9	2	2	403	36.2	24.94	11.1326	0.0078	0.0339	0.017	0.331	0.1117	0.0177	0.054	0.035	0.6081
79521	1	60	3	4	1	5	25	1	1	505.3	16.9	66.04	29.8994	0.0078	0.0339	0.017	0.079	0.1117	0.0177	0.051	0.024	0.3421
79525	1	64	5	4	1	0.87	24.8	2	1	192	12.9	13.73	14.8837	0.0078	0.0339	0.017	0.165	0.1117	0.0177	0.09	0.07	0.5131
79526	1	27	5	2	6	2.39	49.2	1	1	461	53.2	72.22	8.66541	0.0078	0.0339	0.017	0.041	0.1117	0.0177	0.108	0.042	0.3791
79564	1	28	4	3	5	2.04	20.9	1	1	676.37	29.8	39.25	22.697	0.0078	0.0339	0.067	0.0283	0.1117	0.0177	0.206	0.077	0.5494
79573	1	29	5	5	1	3.81	24.3	1	1	449	24.3	23.68	18.4774	0.0078	0.0339	0.017	0.0283	0.1117	0.0177	0.052	0.036	0.3044
79585	1	32	4	4	5	1.09	26	2	1	266	13.3	37.29	20	0.25	0.0339	0.471	0.0283	8.57	0.109	0.833	0.22	10.5152
79586	1	65	4	3	1	1.6	24.8	1	1	741	55.4	186.4	13.3755	0.072	0.0339	0.157	0.375	8.76	0.033	0.435	0.148	10.0139
79593	1	59	3	2	6	2.4558	25.5	1	1	356	34.5	39.7	10.3188	0.113	0.0339	0.199	0.0283	0.1117	0.074	0.531	0.222	1.3129
79597	1	61	3	3	5	1.51	30.8	1	1	332	16.9	42.75	19.645	0.129	0.0339	0.385	0.0283	0.1117	0.162	0.296	0.273	1.4189
79606	1	44	1	1	5	0.94	31.8	2	2	280.31	16.6	16.96	16.8861	0.0078	0.0339	0.017	0.041	0.1117	0.0177	0.069	0.024	0.3221
79608	1	56	4	3	4	3.43	25.7	1	1	1120	49.7	90.33	22.5352	0.046	0.0339	0.13	0.153	0.1117	0.051	0.432	0.136	1.0936
79633	1	25	3	3	5	0.73	22.5	2	2	325	8.34	30.31	38.9688	0.0078	0.0339	0.017	0.824	0.1117	0.0177	0.052	0.06	1.1241
79648	1	62	4	2	1	0.84	39.6	1	1	405	45	51.84	9	0.037	0.0794	0.049	0.0283	0.1117	0.0177	0.16	0.074	0.5571
79650	1	58	3	5	1	5	23.7	2	1	260	19.8	28.17	13.1313	0.0078	0.171	0.017	0.363	0.1117	0.0177	0.058	0.064	0.8102
79651	1	42	1	2	1	2.4558	31.7	2	2	487	24.5	20.21	19.8776	0.0078	0.0339	0.017	0.384	0.1117	0.0177	0.069	0.047	0.6881
79660	1	36	1	4	6	0.28	48.7	2	1	537	40.5	58.56	13.2593	0.0078	0.0339	0.017	0.08	0.1117	0.0177	0.051	0.1	0.4191
79661	1	52	5	3	1	3.53	23.5	2	2	556	20	37.99	27.8	0.0078	0.0339	0.1012	0.042	0.1117	0.0177	0.296	0.088	0.6983
79663	1	39	5	4	1	2.73	22.9	2	2	351	17	29.05	20.6471	0.0078	0.0339	0.017	0.1	0.1117	0.0177	0.039	0.024	0.3511
79664	1	40	3	4	3	3.36	26	1	1	375.5	20.9	24.44	17.9665	0.0078	0.0339	0.017	0.046	0.1117	0.0177	0.039	0.024	0.2971
79667	1	51	3	5	1	5	30.4	2	1	346	24.3	38.21	14.2387	0.0078	1.02	0.029	0.077	0.1117	0.0177	0.271	0.153	1.6872
79671	1	31	4	5	5	5	26.3	2	1	415	28.6	24.64	14.5105	0.0078	0.0339	0.132	0.0283	0.1117	0.0177	0.0177	0.024	0.3731
79691	1	31	3	5	1	5	39.9	2	1	392	25	36.37	15.68	0.0078	0.0339	0.017	0.0283	0.1117	0.0177	0.296	0.062	0.5744
79705	1	67	4	4	5	2.14	31	2	1	454	30.1	64.84	15.0831	0.403	0.0339	0.56	0.0283	0.4074	0.26	1.29	0.535	3.5176
79709	1	72	3	4	1	3.81	31.8	1	1	306	27.9	33.95	10.9677	0.0078	0.0339	0.017	0.0283	0.1117	0.0177	0.084	0.047	0.3474
79712	1	55	3	3	1	0.99	26.3	1	2	315	23	24.49	13.6957	0.054	0.0794	0.172	0.0283	0.1117	0.048	0.506	0.236	1.2354
79763	1	59	3	3	1	5	19.8	1	1	366	15.2	39.73	24.0789	0.088	0.194	0.544	0.0283	0.4074	0.101	1.56	0.616	3.5387
79799	1	33	2	3	1	5	19.9	1	1	328.77	26.9	23	12.2219	0.091	0.0339	0.167	0.056	0.1117	0.028	0.422	0.157	1.0666
79802	1	22	5	2	5	3.63	30.4	2	1	276.8	22.6	10.22	12.2478	0.0078	0.0339	0.017	4.01	0.1117	0.0177	0.051	0.05	4.2991
79810	1	75	5	2	2	5	26.5	1	2	359	24.5	74.91	14.6531	0.088	0.0339	0.095	0.0283	0.1117	0.046	0.297	0.125	0.8249
79821	1	55	1	1	4	0.92	26.7	1	1	496	20.1	37.34	24.6766	0.0078	0.292	0.017	0.0283	0.1117	0.0177	0.151	0.13	0.7555
79823	1	47	4	5	1	5	28	2	1	336.18	30	18.68	11.206	0.0078	0.0794	0.017	0.045	0.1117	0.0177	0.039	0.024	0.3416
79829	1	47	1	4	5	1.02	24.8	1	1	255	12.6	34.94	20.2381	0.0078	0.0339	0.017	0.0283	0.1117	0.0177	0.076	0.051	0.3434
79835	1	37	3	3	3	0.59	31.5	2	1	336	25.6	14.93	13.125	0.0078	0.0339	0.017	0.0283	0.1117	0.0177	0.055	0.059	0.3304
79846	1	39	5	5	1	5	22.7	1	1	380	23.6	26.7	16.1017	0.0078	0.0339	0.017	0.061	0.1117	0.0177	0.066	0.024	0.3391
79863	1	45	1	3	6	1.39	27.1	1	1	528	25.5	31.01	20.7059	0.0078	0.0339	0.017	0.0283	0.1117	0.0177	0.093	0.076	0.3854
79871	1	45	3	2	1	2.4558	44.1	2	1	80.6	8.54	34.96	9.43794	0.0078	0.0339	0.017	0.215	16.7	0.0177	0.083	0.024	17.0984
79885	1	69	3	4	2	1.03	29.4	1	1	441	16.4	75.11	26.8902	0.18	0.0339	0.303	0.0283	9.27	0.079	0.591	0.149	10.6342
79890	1	41	4	4	1	5	32.8	2	2	413.54	50.7	42.46	8.15661	0.0078	0.0339	0.017	0.284	0.1117	0.0177	0.127	0.061	0.6601
79891	1	62	4	3	3	1.74	21.7	2	2	594.39	21.1	85.16	28.1701	0.0078	0.0339	0.017	0.267	0.1117	0.0177	0.168	0.047	0.6701
79898	1	29	5	4	3	1.4	30	2	1	590	40.8	36.5	14.4608	0.0078	0.0339	0.017	0.199	0.1117	0.0177	0.122	0.095	0.6041
79899	1	37	1	2	1	2.9	28.1	2	2	484	29.1	33.63	16.6323	0.0078	0.0339	0.017	0.0283	0.1117	0.0177	0.037	0.024	0.2774
79913	1	63	3	5	5	2.19	23.6	1	1	612	37.8	86.92	16.1905	0.0078	0.0339	0.017	0.0283	0.1117	0.0177	0.244	0.024	0.4844
79920	1	59	5	4	3	0.81	28.3	1	1	306	17.4	35.2	17.5862	0.0078	0.369	0.017	0.0283	0.1117	0.0177	0.052	0.024	0.6275
79932	1	22	1	2	6	1.52	25	1	1	329	18.5	14.3	17.7838	0.0078	0.0339	0.028	0.069	0.1117	0.0177	0.107	0.113	0.4881
79936	1	55	3	3	4	2.23	21.9	1	2	660	12.1	70.91	54.5455	0.442	0.053	0.722	0.162	0.1117	0.194	2.12	0.644	4.4487
79938	1	31	4	5	5	3.87	29.4	2	2	423.2	39	31.5	10.8513	0.0078	0.0339	0.017	0.238	0.1117	0.0177	0.098	0.024	0.5481
79942	1	54	3	2	1	0.86	34.6	1	2	113	6.25	27.25	18.08	0.079	0.0339	0.101	0.0283	0.1117	0.051	0.252	0.096	0.7529
79949	1	72	5	5	1	3.48	22.1	1	1	252.07	15	37.3	16.8047	0.0078	0.0339	0.017	0.096	0.1117	0.0177	0.076	0.059	0.4191
79952	1	55	1	1	1	1.29	23.7	1	1	844	16.5	110	51.1515	0.101	0.0339	0.291	0.0283	0.1117	0.092	1.04	0.454	2.1519
79955	1	37	5	5	1	5	24.5	2	1	327	17.3	33.93	18.9017	0.0078	0.0339	0.017	0.0283	0.1117	0.0177	0.029	0.024	0.2694
79963	1	25	4	3	5	4.1	36.6	2	2	294	30.38	17.14	9.67742	0.0078	0.0339	0.017	0.0283	0.1117	0.0177	0.044	0.024	0.2844
79970	1	71	4	3	3	1.04	30.5	2	2	682.32	33.5	107.4	20.3678	0.0078	0.0339	0.017	0.386	0.1117	0.0177	0.067	0.035	0.6761
79977	1	74	3	5	3	5	33	1	1	275	19.3	36.73	14.2487	0.169	0.0339	0.216	0.0283	0.1117	0.09	0.58	0.28	1.5089
80002	1	55	3	3	1	1.79	37	2	1	273	27.3	39.94	10	0.0078	0.0794	0.017	0.0283	0.1117	0.0177	0.049	0.024	0.3349
80006	1	47	4	5	3	3.07	27.2	2	1	432	25	61.62	17.28	0.0078	0.051	0.017	0.106	0.1117	0.0177	0.034	0.024	0.3692
80010	1	39	4	5	1	3.96	25	2	2	595.95	22	48.88	27.0886	0.0078	0.0794	0.017	0.8817	0.1117	0.0177	0.094	4.95	6.1593
80017	1	28	3	4	1	0.63	18.6	1	2	388	17.7	43.16	21.9209	0.053	0.0339	0.228	0.0283	0.1117	0.048	0.336	0.151	0.9899
80019	1	44	3	2	3	0.67	25.6	1	1	614	25.8	81.6	23.7984	0.0078	0.0339	0.017	0.0283	0.1117	0.0177	0.084	0.131	0.4314
80031	1	33	4	2	1	1.52	26.4	1	1	362	16.4	34.91	22.0732	0.234	0.0339	0.458	38.8	0.1117	0.181	1.05	0.378	41.2466
80037	1	64	1	3	1	3.87	28.6	1	1	291.99	20.4	43.91	14.3132	0.0078	0.12	0.017	0.053	0.1117	0.0177	0.028	0.024	0.3792
80038	1	38	3	1	1	2.4558	23.8	1	1	647	20.3	33.09	31.8719	0.059	0.137	0.138	0.0283	0.1117	0.032	0.291	0.101	0.898
80062	1	34	3	4	1	1	31.7	2	1	252	18.4	40.88	13.6957	0.0078	0.0339	0.017	0.0283	0.1117	0.0177	0.07	0.024	0.3104
80075	1	32	5	5	1	5	24.8	2	2	318	22.8	20.52	13.9474	0.0078	0.0339	0.017	0.0283	0.1117	0.0177	0.035	0.024	0.2754
80078	1	80	5	1	2	0.52	25.7	2	2	441	26	49.15	16.9615	0.0078	0.0339	0.017	0.0283	0.1117	0.0177	0.041	0.037	0.2944
80100	1	30	3	4	1	5	43.4	2	2	178	31	14.45	5.74194	0.0078	0.0339	0.017	0.0283	0.1117	0.0177	0.063	0.044	0.3234
80101	1	29	5	5	5	3.13	32.2	2	1	275.42	22.2	21.84	12.4063	0.0078	0.0339	0.017	0.061	0.1117	0.0177	0.051	0.024	0.3241
80103	1	53	4	4	3	4.61	41.3	1	1	417.56	27.2	44.45	15.3515	0.0078	0.0339	0.017	0.082	0.1117	0.0177	0.134	0.024	0.4281
80105	1	62	4	5	6	1.43	27.1	2	1	503	32.7	49.42	15.3823	0.0078	0.0339	0.39	0.157	0.1117	0.0177	1.84	1.14	3.6981
80121	1	68	5	2	1	2.4558	25.4	2	2	512	29	45.31	17.6552	0.0078	0.0339	0.017	0.227	0.1117	0.0177	0.053	0.04	0.5081
80136	1	65	1	3	1	0.36	29.4	1	1	532	36.7	52.53	14.4959	0.0078	0.0339	0.017	0.0283	0.1117	0.0177	0.227	0.245	0.6884
80137	1	30	5	3	1	2.23	17.6	1	2	672	32	66.89	21	0.039	0.0339	0.08	0.0283	0.1117	0.028	0.248	0.115	0.6839
80145	1	22	1	2	4	0.28	23.8	1	1	899	60.3	45.8	14.9088	0.0078	0.0339	0.017	0.678	0.1117	0.0177	0.076	0.024	0.9661
80148	1	80	1	1	1	0.61	41.5	2	2	185	29	33.46	6.37931	0.0078	0.0339	0.017	0.0283	0.1117	0.0177	0.07	0.078	0.3644
80155	1	52	2	4	1	2.4558	22.4	2	1	341	15.04	34.17	22.6729	0.0078	0.0339	0.017	0.0283	0.1117	0.0177	0.07	0.024	0.3104
80158	1	35	3	2	1	1.27	37.2	1	1	397	29.1	53.8	13.6426	0.154	0.0339	0.176	0.0283	0.1117	0.059	0.493	0.285	1.3409
80168	1	38	5	4	1	0.9	27.3	1	1	403	31.2	41.61	12.9167	0.143	0.0339	0.17	0.806	0.1117	0.075	0.545	0.204	2.0886
80175	1	64	4	3	1	1.77	47.6	2	1	444	59	77.05	7.52542	0.0078	0.0339	0.017	0.0283	0.1117	0.0177	0.037	0.024	0.2774
80178	1	35	1	2	6	4.51	26.3	1	1	256	16	18.45	16	0.025	0.049	0.029	0.129	0.1117	0.0177	0.293	0.35	1.0044
80183	1	75	4	5	5	3.43	45.8	1	1	234	23.5	41.33	9.95745	0.0078	0.0794	0.017	0.119	0.1117	0.0177	0.028	0.024	0.4046
80185	1	61	1	2	1	1.28	25.6	2	1	421	17.4	40.78	24.1954	0.0078	0.0339	0.017	0.041	0.1117	0.0177	0.058	0.043	0.3301
80187	1	60	4	2	1	0.84	25.9	1	1	346	24.8	36.63	13.9516	0.062	0.0339	0.132	0.0283	0.1117	0.045	0.365	0.153	0.9309
80188	1	55	4	5	6	3.48	23.5	1	1	273	19.6	36.3	13.9286	0.24	0.093	6.29	0.0283	11.3	0.134	1.4	0.306	19.7913
80202	1	49	3	3	1	1.81	25.8	1	1	377	24.7	37.53	15.2632	0.319	0.0339	0.498	0.0283	0.1117	0.205	1.17	0.356	2.7219
80203	1	67	5	3	1	2.4558	24.5	2	1	400	17	39.76	23.5294	0.0078	0.0339	0.017	0.0283	0.1117	0.0177	0.08	0.038	0.3344
80205	1	75	3	3	3	1.29	26.5	1	1	140	9.95	24.46	14.0704	0.0078	0.0794	0.017	0.0283	0.1117	0.0177	0.029	0.024	0.3149
80215	1	22	3	4	5	1.91	22.3	2	1	581	21.4	34.13	27.1495	0.0078	0.0339	0.017	0.0283	0.1117	0.0177	0.036	0.024	0.2764
80226	1	30	3	4	1	1.02	22	1	1	325	21.9	32.4	14.8402	0.07	1.53	0.106	0.954	0.1117	0.054	0.274	0.095	3.1947
80227	1	37	3	4	1	2.22	27.9	1	1	389	15.8	24.85	24.6203	0.0078	0.0339	0.017	0.054	0.1117	0.0177	0.053	0.024	0.3191
80233	1	21	4	4	5	0.86	24.8	1	1	513	22.2	33.23	23.1081	0.023	0.0339	0.08	0.0283	0.1117	0.0177	0.197	0.107	0.5986
80242	1	22	3	3	5	2.4558	18.2	1	1	479	21.3	23.57	22.4883	0.206	0.0339	0.258	0.0283	0.1117	0.116	0.732	0.314	1.7999
80249	1	50	3	2	1	0.76	30	1	1	309	14.8	71.13	20.8784	0.081	0.0339	0.106	0.0283	0.1117	0.052	0.312	0.121	0.8459
80250	1	72	3	4	1	2.67	33.1	2	1	444	23.1	59.42	19.2208	0.0078	0.0339	0.017	0.8817	0.1117	0.0177	0.033	0.024	1.1268
80259	1	27	3	2	6	1.2	25.4	1	1	491	18.5	36.77	26.5405	0.124	0.331	0.237	0.0283	0.1117	0.07	0.594	0.194	1.69
80260	1	40	2	3	1	4.61	22.3	1	1	356.83	15.7	37.8	22.728	0.0078	0.0339	0.017	0.0283	0.1117	0.0177	0.076	0.037	0.3294
80263	1	52	3	2	1	0.84	38.8	2	1	273.92	38.8	32.11	7.05979	0.0078	0.0339	0.017	0.0283	0.1117	0.0177	0.054	0.035	0.3054
80275	1	24	1	4	5	0.54	17.2	1	2	789	29.2	57.94	27.0205	0.0078	0.0339	0.017	0.0283	0.1117	0.0177	0.09	0.056	0.3624
80278	1	47	1	1	6	2.4558	33.5	1	2	471	29.3	33.46	16.0751	0.019	0.0339	0.044	0.0283	0.1117	0.0177	0.242	0.111	0.6076
80279	1	38	3	3	1	5	24.5	2	1	399.38	19.2	22.6	20.801	0.0078	0.0794	0.017	0.0283	0.1117	0.0177	0.043	0.024	0.3289
80285	1	50	5	5	1	5	29.3	1	1	223	20.1	21.07	11.0945	0.0078	0.0339	0.017	0.0283	0.1117	0.0177	0.052	0.055	0.3234
80291	1	31	4	4	5	3	24.4	1	1	482	20.1	31.53	23.9801	0.123	0.0794	0.3	0.091	0.1117	0.075	0.665	0.245	1.6901
80301	1	24	3	3	6	2.02	20.4	1	1	442	22.1	46.05	20	0.044	0.0339	0.079	0.0283	0.1117	0.039	0.229	0.101	0.6659
80323	1	33	3	4	3	0.26	25.8	1	1	434.93	27.1	28.43	16.0491	0.165	0.0339	0.1012	0.0283	0.1117	0.076	0.812	0.283	1.6111
80327	1	27	2	5	5	0.87	26	2	1	513	26.5	26.93	19.3585	0.0078	0.0339	0.017	0.062	0.1117	0.0177	0.053	0.024	0.3271
80330	1	73	5	5	1	3.18	27.4	2	1	472	36.1	49.27	13.0748	0.0078	0.0339	0.017	2.27	0.1117	0.0177	0.053	0.024	2.5351
80332	1	24	1	2	5	0.71	22.7	2	2	348	32	13.04	10.875	0.0078	0.0794	0.017	0.0283	0.4074	0.0177	0.028	0.024	0.6096
80335	1	28	3	3	6	1.22	28.4	1	1	506	19.6	49.62	25.8163	0.068	0.0339	0.195	0.0283	0.1117	0.056	0.381	0.133	1.0069
80338	1	23	3	4	6	1.2	24.9	2	1	666	25.3	27.78	26.3241	0.0078	0.0339	0.017	0.089	0.1117	0.0177	0.403	0.024	0.7041
80368	1	46	3	4	1	4.64	27.2	1	1	297	21.1	50.64	14.0758	0.076	0.0339	0.107	0.046	0.1117	0.0177	0.296	0.1668	0.8551
80375	1	47	4	3	3	5	23.8	2	1	348.93	21.3	38.05	16.3817	0.0078	0.0339	0.1012	0.147	0.1117	0.0177	0.095	0.072	0.5863
80379	1	67	3	1	2	2.57	26.7	1	1	758	43.4	55.75	17.4654	0.0078	0.0339	0.017	0.0283	0.1117	0.0177	0.093	0.064	0.3734
80380	1	39	3	3	1	3.3	29.8	2	1	546.34	22.7	42.97	24.0678	0.0078	0.063	0.1012	0.566	0.1117	0.0177	0.044	0.05	0.9614
80382	1	78	4	5	1	1.56	38.8	1	1	233	38.8	31.22	6.00515	0.0078	0.0794	0.017	0.0283	0.1117	0.0177	0.096	0.024	0.3819
80385	1	68	4	3	1	5	31.5	1	1	249	25.7	26.07	9.68872	0.0078	0.0339	0.017	0.0283	0.1117	0.0177	0.062	0.037	0.3154
80386	1	33	3	4	5	2.42	33.3	1	1	260	20.6	19.16	12.6214	0.0078	0.135	0.017	0.0283	0.1117	0.0177	0.083	0.051	0.4515
80391	1	23	1	5	5	0.38	22.9	2	1	1010	33.5	64.16	30.1493	0.0078	0.0339	0.017	0.0283	0.1117	0.0177	0.241	0.07	0.5274
80394	1	60	3	1	1	3.09	28	1	2	557	27.3	55.85	20.4029	0.282	0.979	0.378	0.0283	0.1117	0.183	0.916	0.296	3.174
80396	1	31	4	4	3	5	29.6	2	1	477	29.7	35.53	16.0606	0.0078	0.0339	0.039	0.0283	0.173	0.0177	0.117	0.072	0.4887
80410	1	47	1	4	1	2.4558	27	2	1	390	19.8	44.14	19.697	0.0078	0.0339	0.017	0.0283	0.1117	0.0177	0.094	0.066	0.3764
80427	1	52	4	3	1	3.94	41.9	2	2	150	23.1	20.29	6.49351	0.0078	0.0339	0.017	0.049	0.4074	0.0177	0.049	0.036	0.6178
80428	1	56	1	2	1	2.4558	31.3	1	1	389	24.9	43.83	15.6225	0.0078	0.0339	0.017	0.075	0.1117	0.0177	0.07	0.121	0.4541
80454	1	63	2	1	3	0	25.7	1	1	754	50.1	167.3	15.0499	0.0078	0.0339	0.017	0.067	0.23	0.0177	0.063	0.055	0.4914
80477	1	49	5	3	6	5	23	1	2	283	10.5	39.6	26.9524	0.0078	0.0339	0.017	0.0283	0.1117	0.0177	0.045	0.024	0.2854
80493	1	52	3	5	5	5	34.1	1	1	464.45	28.3	43.45	16.4117	0.043	0.0794	0.066	0.0283	0.1117	0.029	0.209	0.061	0.6274
80498	1	64	5	5	1	5	18.6	1	2	719	33.3	76.8	21.5916	0.032	0.0339	0.04	0.0283	0.1117	0.0177	0.186	0.086	0.5356
80503	1	44	3	3	6	2.6	27.4	1	1	499	22.3	71.1	22.3767	0.117	0.0339	0.166	0.0283	0.1117	0.072	0.432	0.202	1.1629
80506	1	53	3	5	1	5	28.3	2	1	582	43.5	52.88	13.3793	0.0078	0.0339	0.017	0.0283	0.1117	0.0177	0.028	0.1668	0.4112
80522	1	55	3	4	3	4.18	20.8	2	1	330.21	18.1	26.66	18.2436	0.0078	0.0339	0.1012	0.0283	2.64	0.0177	0.056	0.04	2.9249
80523	1	52	1	1	5	0.31	24.3	1	1	642	22.2	39.14	28.9189	0.057	0.0339	0.092	0.0283	0.1117	0.038	0.263	0.128	0.7519
80537	1	65	4	2	1	1.7	26.2	1	1	756	38.7	85.67	19.5349	0.121	0.0339	0.186	0.651	0.1117	0.099	0.419	0.149	1.7706
80539	1	40	4	3	1	1.45	31.4	2	1	250.95	31.6	14.08	7.94146	0.0078	0.0339	0.017	1.13	0.1117	0.0177	0.154	0.058	1.5301
80543	1	28	5	5	6	5	23.2	1	1	469	19.7	50.19	23.8071	0.0078	0.0339	0.017	0.0283	0.1117	0.0177	0.114	0.065	0.3954
80545	1	55	3	4	1	5	32.2	2	1	320	13.6	31.79	23.5294	0.0078	0.0339	0.017	0.0283	0.1117	0.0177	0.066	0.024	0.3064
80547	1	55	4	2	1	2.67	23.2	1	1	444	17.4	64.42	25.5172	0.073	0.0339	0.133	0.181	0.1117	0.048	0.374	0.155	1.1096
80549	1	76	5	5	2	2.06	29.9	2	1	155	22.5	24.09	6.88889	0.0078	0.0339	0.017	0.0283	0.1117	0.0177	0.026	0.024	0.2664
80561	1	41	5	5	1	5	26.3	2	1	398	27.23	19.59	14.6162	0.0078	0.0339	0.017	0.0283	0.1117	0.0177	0.045	0.059	0.3204
80578	1	44	3	5	1	3.55	30	2	1	322.03	14.5	44.24	22.209	0.0078	0.0339	0.017	0.0283	0.1117	0.0177	0.065	0.024	0.3054
80587	1	36	3	4	1	5	26.3	1	1	652.52	34.7	23.8	18.8046	0.0078	0.0794	0.017	0.0283	0.1117	0.0177	0.0177	0.024	0.3036
80592	1	20	1	3	1	0.82	30.8	1	1	468	22.1	19.5	21.1765	0.015	0.0339	0.036	4.08	0.1117	0.0177	0.101	0.12	4.5153
80593	1	63	5	4	1	3.18	22.5	1	1	511	26.3	64.97	19.4297	0.0078	0.0339	0.017	0.0283	0.1117	0.0177	0.08	0.053	0.3494
80596	1	32	3	3	5	1.29	29.9	1	1	389	22.1	23.27	17.6018	0.088	0.0339	0.103	0.0283	0.4074	0.035	0.301	0.117	1.1136
80618	1	32	3	3	5	0.86	25.4	1	1	420	12.5	37.97	33.6	0.404	0.0339	0.536	0.043	0.1117	0.276	1.34	0.501	3.2456
80619	1	33	4	3	1	1.04	35	1	1	325	28.9	24.08	11.2457	0.077	0.0794	0.11	0.14	0.1117	0.026	0.319	0.128	0.9911
80647	1	52	3	5	1	5	23.9	2	1	358	16.6	29.7	21.5663	0.0078	0.146	0.017	0.0283	0.1117	0.0177	0.092	0.051	0.4715
80658	1	50	3	2	1	0.66	28.3	1	2	167	9.17	32.24	18.2116	0.211	0.0339	0.27	0.0283	0.1117	0.124	0.763	0.301	1.8429
80663	1	41	4	5	3	4.7	27.7	2	2	399	30.2	24.64	13.2119	0.0078	0.0339	0.017	0.0283	0.1117	0.0177	0.08	15	15.2964
80692	1	37	3	5	1	5	23	2	1	357	18.2	39.87	19.6154	0.0078	0.0339	0.017	0.123	0.1117	0.0177	0.066	0.098	0.4751
80693	1	30	1	3	1	4.14	21.8	1	1	919	36.5	75.32	25.1781	0.0078	0.0339	0.017	0.612	0.1117	0.0177	0.04	0.063	0.9031
80706	1	50	5	2	1	1.81	25.1	2	2	370	15.5	23.47	23.871	0.0078	0.0339	0.017	0.069	0.1117	0.0177	0.072	0.062	0.3911
80714	1	45	5	4	1	0.85	23.2	2	1	676.73	34.3	47.35	19.7297	0.0078	0.0339	0.017	0.0283	0.1117	0.0177	0.048	0.024	0.2884
80723	1	80	3	3	1	1.29	21.1	1	2	659	43	132.5	15.3256	0.0078	0.0339	0.017	0.677	0.1117	0.0177	0.1	0.045	1.0101
80729	1	31	1	3	5	2.42	30.7	1	1	454	28.4	18.14	15.9859	0.0078	0.0339	0.017	0.0283	0.1117	0.0177	0.11	0.086	0.4124
80733	1	47	3	3	6	0.39	22	1	1	709	28.3	65.51	25.053	0.237	0.0339	0.356	0.0283	0.1117	0.184	0.93	0.349	2.2299
80735	1	41	3	4	1	1.08	32.5	2	1	330	18.2	44.12	18.1319	0.0078	0.0339	0.017	0.0283	0.1117	0.0177	0.043	0.041	0.3004
80741	1	51	2	2	1	1.61	33.3	2	2	294	25.1	20.63	11.7131	0.0078	0.11	0.121	0.533	0.1117	0.0177	0.0177	0.024	0.9429
80743	1	70	3	4	1	1.77	23.9	1	1	262	10.6	40.32	24.717	0.0078	0.0339	0.017	0.437	0.1117	0.0177	0.0177	0.024	0.6668
80745	1	50	4	4	3	2.39	22.9	1	1	397	21.1	38.07	18.8152	0.056	0.0339	0.216	0.583	0.1117	0.031	0.261	0.126	1.4186
80754	1	67	1	3	1	1.38	35.1	2	1	193	11.9	19.73	16.2185	0.0078	0.0339	0.017	1.46	0.1117	0.0177	0.03	0.05	1.7281
80761	1	23	2	2	5	1.42	26.9	1	1	457	25.4	24.82	17.9921	0.0078	0.0339	0.017	0.0283	0.1117	0.0177	0.057	0.05	0.3234
80765	1	37	5	5	1	4.18	29.8	1	2	230	18.2	12.03	12.6374	0.068	0.0339	0.084	1.81	0.1117	0.037	0.324	0.165	2.6336
80769	1	61	3	5	1	3.48	24	2	2	641.72	22.3	96.37	28.7767	0.0078	0.0339	0.017	0.042	0.1117	0.0177	0.1	0.101	0.4311
80770	1	69	4	2	1	2.1	18.5	1	1	510	16.9	82.41	30.1775	0.0078	1.08	0.017	13.7	0.1117	0.0177	0.076	0.056	15.0662
80771	1	59	2	5	3	5	31.6	2	1	203	23.1	23.97	8.78788	0.0078	0.0339	0.017	0.689	0.1117	0.0177	0.034	0.04	0.9511
80772	1	36	3	3	5	1.28	22.4	1	2	690.03	15.3	79.87	45.1	0.0078	0.0339	0.017	0.0283	0.1117	0.0177	0.05	0.024	0.2904
80798	1	29	5	5	1	1.99	28.7	2	1	628	37.3	48.68	16.8365	0.0078	0.0339	0.017	0.0283	0.4074	0.0177	0.101	0.024	0.6371
80814	1	56	3	4	1	5	21.3	2	1	339	23.9	63.64	14.1841	0.0078	0.0339	0.017	0.0283	0.1117	0.0177	0.073	0.024	0.3134
80825	1	30	3	3	1	1.25	26.1	1	1	283	20.6	18.91	13.7379	0.028	0.0339	0.042	0.0283	0.1117	0.0177	0.176	0.056	0.4936
80826	1	33	3	4	1	0.72	30.4	2	1	243	14.7	19.8	16.5306	0.0078	0.0794	0.017	0.4	0.1117	0.0177	0.116	0.082	0.8316
80833	1	33	3	3	1	2.52	27.2	1	1	231	19.1	14.26	12.0942	0.249	0.0339	0.296	0.0283	0.1117	0.093	0.875	0.386	2.0729
80858	1	65	3	5	1	4.67	22.7	1	1	717	28.8	58.6	24.8958	0.0078	0.0339	0.017	0.0283	0.1117	0.0177	0.0177	0.024	0.2581
80862	1	21	5	4	5	4.19	23.5	2	1	401	19.9	24.55	20.1508	0.0078	0.0339	0.017	0.085	0.1117	0.0177	0.048	0.024	0.3451
80864	1	54	3	2	3	0.62	22.6	1	1	977.43	30	152.5	32.581	0.106	0.0339	0.24	0.0283	0.1117	0.081	0.654	0.245	1.4999
80880	1	28	3	4	6	1.54	54.2	1	1	127	25	9.27	5.08	0.0078	0.0339	0.017	0.0283	0.1117	0.0177	0.038	0.042	0.2964
80889	1	80	3	5	1	5	27.8	1	1	720.89	33.1	129.9	21.7792	0.0078	0.0339	0.1012	14.7	0.1117	0.0177	0.027	0.045	15.0443
80898	1	76	4	1	5	0.65	29.9	1	2	707.33	31.9	88.13	22.1734	0.039	0.0339	0.056	0.102	0.1117	0.032	0.156	0.051	0.5816
80900	1	66	1	4	3	2.4558	32.2	2	1	256	21.7	47.93	11.7972	0.0078	0.509	0.017	0.065	0.1117	0.0177	0.066	0.063	0.8572
80904	1	61	3	5	1	5	27.3	2	1	382	20.3	64.05	18.8177	0.0078	0.0339	0.017	0.143	0.1117	0.0177	0.104	4.96	5.3951
80911	1	44	5	4	1	2.1	23.9	2	1	480	21.1	31.92	22.7488	0.0078	0.0339	0.017	0.0283	0.1117	0.0177	0.08	0.047	0.3434
80930	1	73	5	4	1	5	26.6	2	1	366	21.7	39.02	16.8664	0.0078	0.0339	0.027	0.662	0.1117	0.0177	0.187	0.191	1.2381
80934	1	65	2	1	1	0.58	28.1	2	1	220	10.9	30.71	20.1835	0.0078	0.0339	0.017	0.062	0.1117	0.0177	0.11	0.089	0.4491
80936	1	38	3	3	1	3.63	35.4	2	2	315.17	21	37.88	15.0081	0.0078	0.083	0.017	39.7	0.1117	0.0177	0.109	0.162	40.2082
80976	1	59	5	5	1	5	24.2	2	1	476	22.2	37.41	21.4414	0.0078	0.0339	0.017	0.979	0.1117	0.0177	0.065	0.024	1.2561
80979	1	29	2	5	1	5	30.2	2	1	460.73	31.7	25.07	14.5341	0.0078	0.0339	0.017	0.325	0.1117	0.0177	0.056	0.053	0.6221
80982	1	31	3	4	1	0.63	39.3	1	1	266	24.6	18.59	10.813	0.0078	0.0339	0.017	0.0283	0.1117	0.0177	0.047	0.024	0.2874
80990	1	35	5	3	1	0.09	29.1	1	1	443	13.4	18.26	33.0597	0.131	0.342	0.222	0.0283	0.1117	0.071	0.584	0.211	1.701
80997	1	26	2	3	1	0.57	23.7	2	1	535	17.1	33.85	31.2865	0.0078	0.0339	0.017	0.552	0.1117	0.0177	0.064	0.024	0.8281
81000	1	28	4	2	5	1.24	23.5	1	1	431	30.3	18.59	14.2244	0.092	0.0339	0.154	0.043	0.1117	0.056	0.48	0.193	1.1636
81004	1	50	3	3	1	5	27	2	1	484.76	26.1	59.55	18.5732	0.0078	0.0339	0.017	0.0283	0.1117	0.0177	0.067	0.047	0.3304
81010	1	51	3	3	5	2.65	26.2	1	1	742	31.4	76.6	23.6306	0.192	0.0339	0.294	0.0283	0.1117	0.091	0.726	0.288	1.7649
81029	1	43	1	2	1	2.4558	26.4	1	2	434	17.7	47.74	24.5198	0.057	0.0339	0.093	0.0283	0.1117	0.042	0.283	0.097	0.7459
81030	1	60	3	3	1	2.4558	26.6	1	1	297	28.3	26.15	10.4947	0.0078	0.0339	0.017	0.0283	0.1117	0.0177	0.062	0.038	0.3164
81034	1	34	3	3	5	1.33	32	2	2	383	32.8	28.41	11.6768	0.0078	0.0794	0.017	0.0283	0.1117	0.0177	0.046	0.663	0.9709
81037	1	60	4	4	1	3.82	26.7	2	1	466.84	37.7	32.84	12.383	0.0078	0.0339	0.068	0.0283	0.1117	0.0177	0.116	0.07	0.4534
81042	1	63	1	5	4	5	27.7	1	2	406	26.9	44.41	15.0929	0.0078	0.0339	0.017	0.477	0.4074	0.0177	0.044	0.024	1.0288
81061	1	44	3	3	1	2.82	35	1	2	182.85	15	22.46	12.19	0.0078	0.0339	0.017	0.0283	0.1117	0.0177	0.378	0.038	0.6324
81068	1	59	4	4	1	5	31.2	2	1	389	29.1	28.98	13.3677	0.0078	0.0339	0.017	23.8	0.1117	0.0177	0.053	0.041	24.0821
81070	1	31	1	2	1	1.25	28.2	2	2	367	26.3	16.62	13.9544	0.0078	0.0339	0.017	0.0283	0.1117	0.0177	0.051	0.042	0.3094
81083	1	36	3	4	1	1.22	28.2	1	1	455	22.6	31.69	20.1327	0.472	0.0339	0.519	0.0283	0.1117	0.223	1.48	0.596	3.4639
81090	1	32	4	3	4	0.57	24	1	1	875	87.3	48.27	10.0229	0.153	0.0339	0.253	0.113	0.1117	0.082	0.654	0.225	1.6256
81092	1	29	5	4	6	0.72	34.2	1	1	421.62	34.1	32.69	12.3642	0.0078	0.0339	0.017	0.0283	0.1117	0.0177	0.047	0.024	0.2874
81095	1	51	2	5	1	2.63	41.7	1	1	196.16	17.7	9.8	11.0825	0.138	0.0339	0.215	0.0283	0.1117	0.063	0.593	0.162	1.3449
81103	1	80	4	3	1	2.67	24.2	1	1	356	23	45.1	15.4783	0.0078	0.0339	0.017	0.048	0.1117	0.0177	0.107	0.083	0.4261
81131	1	49	2	5	1	5	29.6	1	1	327	22.3	15.13	14.6637	0.0078	0.0794	0.017	0.0283	0.4074	0.0177	0.046	0.024	0.6276
81139	1	23	5	4	5	3.84	33.5	1	1	337	19.7	23.42	17.1066	0.0078	0.0339	0.017	0.21	0.1117	0.0177	0.055	0.04	0.4931
81144	1	49	3	3	1	1.68	32.3	2	1	642	32.7	59.48	19.633	0.0078	0.083	0.017	1.22	0.1117	0.0177	0.182	0.146	1.7852
81151	1	56	3	5	1	5	24.9	2	1	547	40.2	50.04	13.607	0.0078	0.0339	0.027	0.078	0.4074	0.0177	0.213	0.168	0.9528
81160	1	23	3	2	1	0.97	47.1	2	2	351	31.1	39.53	11.2862	0.0078	0.0339	0.032	23	0.1117	0.0177	0.032	0.024	23.2591
81161	1	33	3	2	6	0.96	27.5	1	1	353.84	14	28.56	25.2743	0.147	0.0339	0.427	0.0283	0.1117	0.12	1.1	0.354	2.3219
81203	1	62	3	5	1	5	26.1	2	1	244	9.38	33.09	26.0128	0.0078	0.0339	0.017	0.0283	0.1117	0.0177	0.086	0.024	0.3264
81207	1	39	3	5	1	5	23.4	2	1	842	35.3	65.24	23.8527	0.0078	0.0339	0.043	0.0283	0.1117	0.0177	0.24	0.199	0.6814
81213	1	50	3	3	1	2.77	28.2	1	1	442.73	13	69.36	34.0562	0.193	0.0339	0.249	0.477	0.1117	0.091	0.705	0.271	2.1316
81214	1	50	5	3	1	1.62	23.5	1	2	381	29.4	43.01	12.9592	0.0078	0.0339	0.017	0.041	0.1117	0.0177	0.061	0.024	0.3141
81217	1	45	3	4	1	1.91	21.3	1	1	597	32.2	48.64	18.5404	0.167	0.0339	0.423	0.0283	0.1117	0.145	1.1	0.351	2.3599
81219	1	37	4	3	4	3	30.7	1	1	409	24.9	14.4	16.4257	0.033	0.0794	0.054	1.64	0.1117	0.0177	0.162	0.077	2.1748
81225	1	37	5	5	1	5	24.4	2	1	699	22.5	44.57	31.0667	0.0078	0.0339	0.017	0.0283	0.1117	0.0177	0.043	0.024	0.2834
81229	1	74	1	1	2	0.29	23.8	2	2	621.62	17.1	101	36.352	0.0078	0.0339	0.017	0.083	0.1117	0.0177	0.042	0.024	0.3371
81234	1	67	1	5	3	2.4558	27.3	2	1	400.18	24.9	47.63	16.0715	0.0078	0.0339	0.057	0.0283	0.219	0.0177	0.302	0.205	0.8707
81237	1	39	3	4	1	1.07	24.7	2	2	396	19.8	25.68	20	0.0078	0.0339	0.017	0.0283	0.1117	0.0177	0.05	0.035	0.3014
81241	1	51	4	3	3	2.77	23.6	1	1	446	29.7	54.48	15.0168	0.193	0.051	0.669	0.117	0.1117	0.126	2.21	1.29	4.7677
81250	1	50	2	1	1	0.22	30.2	2	1	240	21	15.28	11.4286	0.0078	0.0339	0.017	0.0283	0.1117	0.0177	0.027	0.106	0.3494
81256	1	69	3	1	1	0.75	24.2	1	2	672	17.7	59.01	37.9661	0.31	0.0339	0.342	0.0283	0.1117	0.171	1	0.425	2.4219
81266	1	39	3	3	1	2.15	31	1	1	600	39.1	52.72	15.3453	0.165	0.0339	0.2	0.05	0.1117	0.086	0.585	0.234	1.4656
81273	1	32	4	3	6	2.53	35.3	2	1	569	22.1	46.62	25.7466	0.014	0.0339	0.093	0.0283	0.1117	0.0177	0.243	0.133	0.6746
81303	1	20	5	3	5	1.92	29	1	1	768	34.7	43.07	22.1326	0.083	0.0339	0.202	0.0283	0.1117	0.04	0.452	0.17	1.1209
81306	1	57	3	2	1	2.58	34.2	1	1	400.67	38.5	40.7	10.407	0.13	0.0339	0.322	0.0283	0.1117	0.094	0.691	0.249	1.6599
81311	1	68	1	1	1	2.4558	28	1	1	360	20.3	37.95	17.734	0.125	0.0339	0.192	0.059	0.1117	0.052	0.504	0.21	1.2876
81320	1	28	3	3	1	1.02	20.1	1	1	583	13.8	50.97	42.2464	0.233	0.0339	0.332	1.59	0.1117	0.115	0.797	0.287	3.4996
81323	1	50	3	5	1	5	28.4	1	1	431.04	14.8	55.91	29.1243	0.0078	0.0339	0.017	0.1	0.1117	0.0177	0.114	0.084	0.4861
81344	1	59	1	1	1	2.33	31	1	1	273	17.9	38.89	15.2514	0.0078	0.0339	0.017	0.135	0.1117	0.0177	0.058	0.035	0.4161
81348	1	21	2	2	5	1.25	22.4	2	2	420	22.6	13.11	18.5841	0.0078	0.0339	0.017	0.057	0.1117	0.0177	0.071	0.024	0.3401
81349	1	36	2	3	6	0.92	29.1	1	1	386.4	25.2	29.58	15.3333	0.0078	0.0339	0.017	0.121	0.1117	0.0177	0.054	0.054	0.4171
81362	1	21	3	2	5	2.4558	20.8	2	1	506	13.5	34	37.4815	0.0078	0.0339	0.017	31.8	0.1117	0.0177	0.284	0.363	32.6351
81367	1	48	1	2	1	2.4558	27.1	1	2	451	18.9	42.98	23.8624	0.0078	0.0339	0.017	0.0283	0.1117	0.0177	0.089	0.067	0.3724
81379	1	48	1	2	1	3.63	33.6	1	1	531.61	32.6	64.66	16.3071	0.013	0.0339	0.017	0.256	0.1117	0.0372	0.0177	0.024	0.5105
81380	1	80	3	1	2	1.2	21.5	1	2	234	13.9	38.49	16.8345	0.298	0.0339	0.525	0.0283	0.1117	0.232	1.25	0.449	2.9279
81382	1	71	1	4	1	4.84	29.4	1	1	321	16.4	41.95	19.5732	0.0078	0.0339	0.017	0.707	0.1117	0.0177	0.079	0.356	1.3301
81384	1	40	5	5	1	4.61	18.8	2	2	655	28	59.08	23.3929	0.0078	0.0339	0.017	0.0283	0.1117	0.0177	0.038	0.024	0.2784
81391	1	64	4	2	4	0.89	22.3	1	1	561	28.9	99	19.4118	0.325	0.0339	0.786	0.187	4.33	0.172	1.41	0.44	7.6839
81396	1	21	1	3	5	2.4558	27.2	2	1	540.81	24	23.77	22.5338	0.0078	0.0339	0.017	0.406	0.1117	0.0177	0.088	0.024	0.7061
81416	1	80	3	4	1	0.85	26.7	2	2	348.31	24.5	50.85	14.2167	0.0078	0.0339	0.043	0.0283	0.1117	0.0177	0.049	0.024	0.3154
81427	1	52	1	1	6	0.42	26.3	2	1	342	19.2	33.39	17.8125	0.0078	0.0339	0.017	0.0283	0.1117	0.0177	0.076	0.063	0.3554
81468	1	74	3	2	1	5	25.5	2	1	224.76	20.2	31.93	11.1267	0.0078	0.0339	0.017	0.0283	0.1117	0.0177	0.147	0.102	0.4654
81472	1	29	5	5	5	2.4558	32.8	2	1	336	24.1	21.44	13.9419	0.0078	0.083	0.017	0.111	0.1117	0.0177	0.043	0.035	0.4262
81484	1	32	3	4	1	1.43	52.6	2	1	253	29.9	19.6	8.46154	0.0078	0.0339	0.017	0.531	0.1117	0.0177	0.052	0.038	0.8091
81509	1	42	4	4	5	0.69	20.2	1	1	611	26.3	46	23.2319	0.128	0.0339	0.191	0.05	0.1117	0.06	0.603	0.247	1.4246
81514	1	23	1	2	5	0.95	29.8	1	1	316	11.6	19.83	27.2414	0.016	0.0339	0.199	0.0283	0.1117	0.038	0.317	0.168	0.9119
81524	1	73	2	2	1	1.89	24.4	1	1	374	31.3	41.43	11.9489	0.0078	0.0339	0.017	0.041	0.1117	0.0177	0.041	0.024	0.2941
81527	1	35	4	2	5	0	21	1	1	468	22.2	78.71	21.0811	0.017	0.0339	0.083	0.0283	0.1117	0.0177	0.206	0.086	0.5836
81564	1	50	5	1	1	0.5	24.7	1	1	423	22.8	21.59	18.5526	0.0078	0.0339	0.017	0.156	0.1117	0.0177	0.072	0.024	0.4401
81578	1	60	3	4	1	5	31.7	1	1	267	24.5	24.27	10.898	0.0078	0.0339	0.017	0.0283	0.1117	0.0177	0.183	0.144	0.5434
81582	1	72	5	3	1	1.27	25.6	2	2	279	25.6	27.97	10.8984	0.0078	0.0339	0.017	0.0283	0.1117	0.0177	0.058	0.044	0.3184
81585	1	36	3	4	6	0.67	25.5	1	1	60.6	13.8	19.28	4.3913	0.124	0.0339	0.156	0.0283	0.1117	0.047	0.549	0.347	1.3969
81593	1	68	2	3	4	1.1	26.9	1	1	271.26	16.4	30.57	16.5402	0.0078	0.0339	0.017	0.065	0.1117	0.0177	0.169	0.055	0.4771
81598	1	50	1	1	1	1.61	28.1	1	1	476	10.3	80.41	46.2136	0.0078	0.0339	0.017	0.0283	0.1117	0.0177	0.051	0.024	0.2914
81610	1	60	1	1	1	2.4558	25.1	1	1	554.74	25.1	35.7	22.1012	0.023	0.0339	0.036	0.158	0.1117	0.0177	5.71	0.784	6.8743
81614	1	21	3	4	5	1.54	19.4	2	1	356	15	45.77	23.7333	0.0078	0.0339	0.017	0.06	0.1117	0.0177	0.058	0.024	0.3301
81617	1	52	2	3	5	0.94	25.4	1	1	521	46.6	51.19	11.1803	0.101	0.069	0.252	0.091	0.1117	0.079	0.609	0.247	1.5597
81633	1	51	4	4	6	3	28.3	1	1	486	28.9	47.46	16.8166	0.0078	0.0339	0.017	3.91	0.1117	0.0177	0.051	0.024	4.1731
81654	1	67	3	4	1	3.87	37.8	1	1	341.46	23.2	35.47	14.7181	0.204	0.0339	0.587	0.0283	0.1117	0.178	1.12	0.29	2.5529
81677	1	60	2	4	1	3.35	36.8	2	1	261	21.6	30.08	12.0833	0.0078	0.0339	0.017	0.0283	0.1117	0.0177	0.037	0.024	0.2774
81679	1	36	3	5	1	5	27.3	1	1	324	22.2	24.77	14.5946	0.0078	0.0794	0.1012	0.0283	0.1117	0.0177	0.296	0.043	0.6851
81698	1	31	3	4	1	2.22	29.2	1	1	464	18.1	32.84	25.6354	0.0078	0.0339	0.017	0.0283	0.1117	0.0177	0.08	0.067	0.3634
81717	1	35	4	5	1	3.22	34.3	2	1	187	18.3	22.27	10.2186	0.0078	0.0339	0.017	0.0283	0.1117	0.0177	0.053	0.039	0.3084
81719	1	43	5	5	1	2.73	24.8	2	2	339	20.6	11.06	16.4563	0.0078	0.0339	0.017	0.075	0.1117	0.0177	0.063	0.024	0.3501
81743	1	80	3	2	2	1.89	25.4	1	1	162	16.6	66.09	9.75904	0.0078	0.0339	0.017	0.0283	0.1117	0.0177	0.045	0.024	0.2854
81753	1	28	3	4	1	1.15	19.9	2	2	421	17.6	38.85	23.9205	0.0078	0.0339	0.017	0.0283	0.1117	0.0177	0.036	0.024	0.2764
81764	1	74	1	2	1	2.4558	30.1	1	1	406	29.3	42.82	13.8567	0.0078	0.0339	0.017	0.211	0.4074	0.0177	0.029	0.024	0.7478
81772	1	49	2	4	1	1.33	27.4	1	1	492.69	20.9	83.3	23.5737	0.023	0.2	0.032	1.47	0.1117	0.0177	0.206	0.205	2.2654
81781	1	50	1	3	1	0.74	27.8	1	1	583	53.4	56.43	10.9176	0.022	0.0339	0.017	0.0283	0.4074	0.0177	0.111	0.064	0.7013
81787	1	34	4	2	6	0.98	28.1	2	1	408.7	34.4	17.81	11.8808	0.169	0.0339	0.1012	0.0283	0.161	0.049	0.449	0.159	1.1504
81798	1	71	3	5	3	1.8	40.8	2	2	256	41.3	76.15	6.19855	0.0078	0.0339	0.017	0.0283	0.1117	0.0177	0.027	0.024	0.2674
81802	1	30	5	5	5	5	26.2	2	2	424	19.7	27.79	21.5228	0.0078	0.0339	0.017	0.0283	0.1117	0.0177	0.0177	0.024	0.2581
81815	1	75	2	1	1	0.93	25.9	2	2	427	23.5	42.69	18.1702	0.0078	0.0339	0.017	0.0283	0.1117	0.0177	0.06	0.099	0.3754
81818	1	75	3	3	1	2.4558	23.7	1	2	310.35	17.7	66.41	17.5339	0.0078	0.0339	0.017	0.0283	0.1117	0.0177	0.073	0.066	0.3554
81819	1	34	3	3	6	0.68	25.6	1	1	908	28.5	120.3	31.8596	0.039	0.0339	0.253	0.0283	0.1117	0.051	0.669	0.27	1.4559
81820	1	65	4	3	6	1.85	22.7	1	1	446	10.5	48.56	42.4762	0.168	0.0339	0.33	0.107	0.1117	0.11	0.905	0.285	2.0506
81824	1	78	3	3	1	1.92	25.3	1	1	549.84	47.7	50.65	11.527	0.0078	0.0339	0.017	0.041	0.1117	0.0177	0.049	0.024	0.3021
81830	1	39	3	4	1	1.97	23.9	2	1	505	26.8	32.34	18.8433	0.0078	0.0339	0.085	0.0283	0.1117	0.0177	0.147	0.139	0.5704
81833	1	72	3	5	1	5	24.5	1	1	461.27	17.1	64.11	26.9749	0.0078	0.0339	0.1012	0.0283	0.1117	0.0177	0.213	0.151	0.6646
81844	1	25	4	5	5	3.28	26.7	1	1	561	25.6	39.18	21.9141	0.139	0.0339	0.19	0.053	0.1117	0.071	0.576	0.238	1.4126
81845	1	75	3	3	1	1.37	27.8	2	1	467	24.7	124.6	18.9069	0.0078	0.0339	0.017	0.091	0.1117	0.0177	0.086	0.064	0.4291
81850	1	67	4	3	1	3.35	33	2	1	451	30.4	40.04	14.8355	0.0078	0.0339	0.017	7.05	0.1117	0.0177	0.081	0.024	7.3431
81851	1	73	3	3	1	1.38	25.8	1	1	256	19.6	47.38	13.0612	0.0078	0.054	0.017	0.0283	0.1117	0.0177	0.066	0.039	0.3415
81860	1	21	3	4	5	4.86	43.3	2	1	207	37.2	13.36	5.56452	0.0078	0.0339	0.017	0.057	0.1117	0.0177	0.035	0.024	0.3041
81865	1	42	4	4	1	4.1	35.4	2	1	603	33.8	58.15	17.8402	0.0078	0.108	0.017	0.0283	0.1117	0.0177	0.296	0.14	0.7265
81879	1	73	3	2	1	2.48	24.9	1	2	332	19.5	61.07	17.0256	0.0078	0.0339	0.043	0.4	0.1117	0.0177	0.215	0.203	1.0321
81887	1	80	3	1	3	1.03	27.3	1	1	294	23.6	52.57	12.4576	0.0078	0.0339	0.017	0.0283	0.1117	0.0177	0.062	0.037	0.3154
81893	1	30	5	3	1	2.32	26.4	2	2	424	24.6	38.78	17.2358	0.0078	0.0339	0.017	0.079	0.1117	0.0177	0.039	0.035	0.3411
81910	1	30	1	2	1	2.55	27.9	1	1	377	20.6	28.03	18.301	0.042	0.07	0.137	0.0283	19.5	0.025	0.422	0.177	20.4013
81923	1	35	4	3	6	1.74	28	1	1	424	13.2	52.25	32.1212	0.064	0.181	0.138	0.107	0.1117	0.04	0.4	0.171	1.2127
81925	1	23	5	4	5	1.81	22.3	1	1	493	17.5	24.37	28.1714	0.0078	0.0339	0.017	0.0283	0.1117	0.0177	0.052	0.036	0.3044
81942	1	22	3	1	1	1.46	17.8	1	2	437	26.4	43.89	16.553	0.0078	0.0339	0.314	0.0283	0.1117	0.0177	0.241	0.209	0.9634
81949	1	47	2	4	1	2.87	29.5	2	1	852	41.3	73.08	20.6295	0.0078	0.0339	0.017	0.0283	0.1117	0.0177	0.139	0.131	0.4864
81952	1	56	5	5	1	3.54	25.2	1	1	244	9.85	25.65	24.7716	0.0078	0.0339	0.017	0.0283	0.1117	0.0177	0.155	0.05	0.4214
81954	1	23	3	3	1	4.77	34.4	2	1	225	16.1	18.74	13.9752	0.0078	0.0794	0.017	0.0283	0.1117	0.0177	0.08	0.024	0.3659
81955	1	26	4	5	5	5	25.4	2	1	367.58	17.4	26.44	21.1253	0.388	2.42	0.576	0.0283	0.1117	0.233	1.42	0.415	5.592
81957	1	49	4	3	1	3.49	35.5	2	1	310	32.9	31.55	9.42249	0.0078	0.0339	0.017	0.045	0.1117	0.0177	0.192	0.244	0.6691
81965	1	42	3	4	1	2.11	27.8	2	2	320	25.7	21.9	12.4514	0.0078	0.0339	0.017	0.554	0.1117	0.0177	0.035	0.061	0.8381
81969	1	58	5	3	1	2.05	22.5	1	2	456	16.9	42.61	26.9822	0.0078	0.0339	0.017	0.0283	0.1117	0.0177	0.13	0.094	0.4404
81971	1	30	3	3	6	2.23	30.7	1	1	187	15.4	14.09	12.1429	0.17	0.0339	0.21	0.0283	0.1117	0.088	0.57	0.245	1.4569
81974	1	41	3	5	1	5	30.5	2	1	345	17.37	39.99	19.8618	0.0078	0.0339	0.017	0.0283	0.1117	0.0177	0.04	0.07	0.3264
81979	1	53	4	3	1	5	39.8	2	1	198	26.2	27.18	7.55725	0.0078	0.0339	0.017	0.0283	0.1117	0.0177	0.03	0.024	0.2704
81980	1	38	3	5	6	1.04	36.4	1	1	329	21.9	20.55	15.0228	0.0078	0.0339	0.143	0.066	0.1117	0.0177	0.031	0.035	0.4461
81997	1	80	3	4	1	1.02	30.2	1	1	469.55	22.8	88.13	20.5943	0.0078	0.0339	0.017	0.0283	0.1117	0.0177	0.051	0.024	0.2914
82001	1	50	3	1	1	2.52	27.4	2	1	302	14.6	30.21	20.6849	0.0078	0.0339	0.017	0.125	0.1117	0.0177	0.588	0.045	0.9461
82020	1	41	3	5	1	3.82	28.5	1	1	546.71	11.8	49.7	46.3314	0.074	0.0339	0.158	0.0283	0.1117	0.038	0.406	0.168	1.0179
82047	1	64	3	3	3	1.29	24.7	1	1	520	37.1	40.49	14.0162	0.046	1.92	0.321	0.154	0.1117	0.055	0.914	0.294	3.8157
82055	1	77	3	4	1	2.4558	36.2	1	1	149	24.38	46.91	6.11157	0.0078	0.0339	0.017	0.0283	0.1117	0.0177	0.043	0.024	0.2834
82058	1	34	5	4	1	5	31.9	1	2	291	19.9	18.04	14.6231	0.056	0.0339	0.083	0.084	0.1117	0.032	0.243	0.095	0.7386
82068	1	44	1	2	6	2.26	30.1	2	1	531	29	24.09	18.3103	0.0078	0.0339	0.017	0.156	0.1117	0.0177	0.034	0.024	0.4021
82075	1	26	3	3	1	3.5	29.8	2	1	368	28	42.02	13.1429	0.0078	0.924	0.017	0.0283	0.1117	0.0177	0.126	0.145	1.3775
82089	1	25	3	3	5	0.61	22.2	1	1	891.13	42	72.44	21.2174	0.58	0.0794	0.585	0.079	0.1117	0.26	1.6	0.598	3.8931
82093	1	36	3	2	4	0.77	24.8	1	1	526.83	52.8	42.8	9.97784	0.08	0.0339	0.145	0.055	0.1117	0.064	0.302	0.116	0.9076
82098	1	64	1	3	1	1.51	36.8	1	1	143	19.2	26.82	7.44792	0.0078	0.0339	0.017	0.0283	0.1117	0.0177	0.062	0.08	0.3584
82099	1	54	3	3	5	0.78	28.4	1	1	623	17.6	69.12	35.3977	0.0078	0.0339	0.017	0.0283	0.1117	0.0177	0.041	0.024	0.2814
82103	1	51	3	2	3	2.4558	27.9	1	1	503	44.8	31.77	11.2277	0.048	0.0339	0.206	0.0283	0.1117	0.027	0.336	0.139	0.9299
82107	1	43	3	3	1	2.55	31.8	2	1	331.18	22.5	21.37	14.7191	0.0078	0.0339	0.017	0.096	0.1117	0.0177	0.116	0.085	0.4851
82111	1	25	3	5	1	5	22	2	2	331	18	31.39	18.3889	0.0078	0.0339	0.017	0.0283	0.1117	0.0177	0.296	0.159	0.6714
82113	1	69	3	4	3	1.29	24.4	1	1	415	25.3	81.31	16.4032	0.083	0.0339	0.202	0.0283	0.1117	0.061	0.499	0.186	1.2049
82115	1	39	3	3	6	0.47	34.1	1	1	194	24	21.62	8.08333	0.024	0.0339	0.038	0.0283	0.1117	0.0177	0.133	0.069	0.4556
82126	1	56	2	5	1	5	23.5	1	1	403	14.7	44.76	27.415	0.0078	0.0339	0.017	2.68	0.1117	0.0177	0.076	0.024	2.9681
82138	1	61	4	3	1	3.95	23.3	1	1	319.4	51	40.01	6.26275	0.166	0.0339	0.256	0.069	0.1117	0.088	0.688	0.259	1.6716
82143	1	73	3	5	1	5	24.3	1	1	300	26.6	36.49	11.2782	0.0078	0.0339	0.017	0.14	0.1117	0.0177	0.058	0.024	0.4101
82148	1	35	5	5	5	5	25.5	2	1	217.57	16.9	15.58	12.874	0.0078	0.0339	0.017	0.098	0.1117	0.0177	0.122	0.024	0.4321
82149	1	25	3	3	1	0.93	29.9	1	1	463	16.9	21.84	27.3964	0.055	0.0339	0.072	0.0283	0.1117	0.029	0.243	0.093	0.6659
82153	1	53	1	1	1	0.88	32.6	1	1	403	20.8	29.06	19.375	0.016	0.0339	0.048	0.0283	0.1117	0.0177	0.207	0.114	0.5766
82158	1	61	3	4	1	5	25	2	1	580	35.2	51.52	16.4773	0.0078	0.0339	0.017	0.0283	0.1117	0.0177	0.133	0.06	0.4094
82162	1	68	3	4	1	3.89	34.7	1	1	200	22.6	31.11	8.84956	0.069	0.0339	0.088	0.097	0.1117	0.05	0.296	0.119	0.8646
82164	1	40	4	2	6	0.18	32.4	1	1	481	29.1	33.7	16.5292	0.068	0.0339	0.101	0.0283	0.1117	0.043	0.311	0.127	0.8239
82167	1	70	3	5	1	5	26.7	2	1	291	16.8	46.27	17.3214	0.0078	0.0339	0.017	0.0283	0.1117	0.0177	0.296	0.101	0.6134
82171	1	64	3	3	1	1.29	23.9	1	1	450	19.5	64.35	23.0769	0.0078	0.0339	0.1012	0.112	0.1117	0.0177	0.296	0.024	0.7043
82172	1	29	5	4	3	3.54	24.6	1	1	377	20.8	28.53	18.125	0.103	0.0339	0.167	0.0283	0.1117	0.062	0.4	0.114	1.0199
82176	1	57	4	4	1	4.19	35.8	1	1	356.38	27	47.27	13.1993	0.048	0.0339	0.074	6.59	0.1117	0.0177	0.282	0.145	7.3023
82184	1	72	3	3	3	1.2	27.5	1	1	487	31.9	60.57	15.2665	0.021	0.0794	0.093	0.0283	0.1117	0.0177	0.176	0.094	0.6211
82188	1	42	3	3	3	1.15	33.3	2	2	412	23.15	35.02	17.797	0.0078	0.272	0.017	0.047	0.1117	0.0177	0.037	0.062	0.5722
82195	1	20	3	4	5	2.4558	22.9	1	1	709	33.1	40.75	21.4199	0.272	0.0339	0.531	0.0283	0.1117	0.167	1.32	0.495	2.9589
82213	1	46	3	5	1	3.67	24.2	2	1	311	19.7	26.89	15.7868	0.0078	0.0339	0.017	0.0283	0.1117	0.0177	0.065	0.053	0.3344
82216	1	52	5	3	1	4.06	29.1	1	1	410	22.5	41.9	18.2222	0.132	0.0794	0.1012	0.0283	0.1117	0.081	0.296	0.232	1.0616
82221	1	44	3	5	1	4.19	26.4	2	2	330	19.2	19.89	17.1875	0.0078	0.0339	0.017	0.0283	0.1117	0.0177	0.079	0.066	0.3614
82226	1	80	4	3	3	2.4558	25	1	2	511	20.2	66.93	25.297	0.0078	0.0339	0.017	0.646	0.1117	0.0177	0.054	0.024	0.9121
82230	1	60	5	5	1	2.74	27.6	1	2	506	16.4	41.55	30.8537	0.099	0.0339	0.134	0.078	0.1117	0.065	0.43	0.179	1.1306
82231	1	53	3	3	3	0.61	21.3	1	1	1180	43	118	27.4419	0.178	0.0339	0.449	0.0283	0.1117	0.146	1.24	0.447	2.6339
82254	1	77	3	5	1	2.58	27.5	1	1	431.91	25.2	74.46	17.1393	0.0078	0.0794	0.017	0.0283	0.1117	0.0177	0.098	0.052	0.4119
82271	1	23	3	1	5	0.69	22.8	1	2	528	20.5	49.11	25.7561	0.618	0.0339	0.854	0.0283	0.1117	0.313	2.29	0.966	5.2149
82278	1	20	3	3	5	1.74	20.7	2	1	574.99	17.3	25.53	33.2364	0.0078	0.0339	0.202	0.0283	0.1117	0.0177	0.066	0.044	0.5114
82282	1	34	3	2	6	0.9	24.9	2	1	424	14.6	41.64	29.0411	0.064	0.0339	0.091	0.0283	0.1117	0.056	0.236	0.123	0.7439
82283	1	48	1	1	1	2.4558	34	1	1	227	16.5	34.22	13.7576	0.0078	0.0339	0.017	0.0283	0.1117	0.0177	0.046	0.065	0.3274
82288	1	55	3	2	1	1.29	23.3	1	1	538.62	26.2	76.94	20.558	0.211	0.0339	0.633	0.0283	0.1117	0.146	1.28	0.422	2.8659
82290	1	43	1	2	1	2.05	31.4	1	1	426	24.1	32.27	17.6763	0.0078	0.0339	0.017	0.095	0.1117	0.0177	0.062	0.06	0.4051
82295	1	80	3	3	1	1.38	24.1	1	1	412	19.7	91.68	20.9137	0.0078	0.0339	0.017	0.111	0.1117	0.0177	0.029	0.024	0.3521
82306	1	43	5	5	1	2.4558	21.1	2	2	336	11.7	38.67	28.7179	0.0078	0.0339	0.032	8.78	0.1117	0.0177	0.219	0.147	9.3491
82308	1	33	3	4	1	0.57	24.6	1	1	485	28.6	20.48	16.958	0.115	0.0339	0.198	0.0283	0.1117	0.04	0.46	0.188	1.1749
82320	1	28	3	5	1	4.3	26.6	2	1	216	16.5	21.31	13.0909	0.0078	0.0339	0.017	0.0283	0.1117	0.0177	0.05	0.04	0.3064
82325	1	39	3	4	1	1.23	30.5	1	1	465.43	23.5	53.13	19.8055	0.178	0.05	0.272	0.043	0.1117	0.136	0.748	0.242	1.7807
82329	1	45	3	5	1	5	25.3	2	1	545.33	33.4	34.12	16.3272	0.0078	0.0339	0.017	0.0283	0.1117	0.0177	0.052	0.024	0.2924
82335	1	52	3	4	1	3.5	32.9	2	1	348	28.6	24.63	12.1678	0.0078	0.0339	0.017	0.0283	0.1117	0.0177	0.033	0.024	0.2734
82336	1	28	4	2	5	2.4558	23.5	1	1	523	37.3	37.85	14.0214	0.056	0.0339	0.1	0.0283	1.19	0.0177	0.306	0.138	1.8699
82344	1	70	4	1	3	1.06	22.7	1	1	623.06	32.9	95.7	18.938	0.0078	0.0339	0.017	0.754	0.1117	0.0177	0.081	0.024	1.0471
82351	1	65	4	2	3	1.15	24.9	1	1	803	40.1	77.96	20.0249	0.058	0.0339	0.109	0.0283	0.1117	0.046	0.309	0.108	0.8039
82353	1	53	5	5	1	5	27.3	2	1	488.5	26	48.24	18.7885	0.0078	0.0339	0.017	0.468	0.1117	0.0177	0.082	0.061	0.7991
82363	1	38	3	4	3	1.02	38	2	1	263	24.8	29.34	10.6048	0.0078	0.0339	0.017	0.0283	0.1117	0.0177	0.06	0.024	0.3004
82367	1	35	1	1	1	2.4558	27.8	1	2	417	15	40.38	27.8	0.0078	0.0339	0.017	0.0283	0.1117	0.0177	0.054	0.049	0.3194
82376	1	41	4	3	1	0.72	28.3	2	2	361	30.1	22.45	11.9934	0.0078	0.0339	0.017	0.0283	0.1117	0.0177	0.031	0.04	0.2874
82380	1	44	3	3	1	4.55	27.1	2	1	230	23.7	27.8	9.70464	0.0078	0.091	0.017	0.0283	0.1117	0.0177	0.06	0.067	0.4005
82383	1	62	1	1	1	1.65	24.3	1	1	393	24	41.31	16.375	0.178	0.11	0.215	0.066	0.1117	0.063	0.684	0.287	1.7147
82391	1	26	3	5	1	2.02	28.8	2	1	364	18.5	47.86	19.6757	0.0078	0.0339	0.017	0.169	0.1117	0.0177	0.033	0.024	0.4141
82393	1	20	2	3	5	0.69	19.3	1	1	726	17.6	58.06	41.25	0.124	0.0339	0.243	0.127	0.1117	0.062	0.567	0.277	1.5456
82397	1	33	3	3	3	1.29	29.2	1	1	425	25.1	34.9	16.9323	0.163	0.0794	0.192	0.0283	0.1117	0.087	0.563	0.234	1.4584
82398	1	31	1	3	1	0.91	38.4	2	1	337	19.7	36.72	17.1066	0.0078	0.0339	0.155	0.0283	0.1117	0.0177	0.283	0.166	0.8034
82402	1	65	5	5	1	5	24.8	1	1	340	22.1	28	15.3846	0.0078	0.0339	0.017	0.138	0.1117	0.0177	0.057	0.024	0.4071
82403	1	80	3	5	1	5	22.3	2	1	346	22.7	47.66	15.2423	0.0078	0.0339	0.017	0.142	0.1117	0.0177	0.037	0.024	0.3911
82409	1	63	3	5	1	1.24	29.2	1	1	360	19.3	56.63	18.6528	0.186	0.0339	0.436	0.0283	0.1117	0.177	1.04	0.359	2.3719
82416	1	50	4	4	1	1.88	32.3	1	1	544	25.1	23.04	21.6733	0.249	0.0339	0.417	0.096	0.1117	0.116	1.12	0.452	2.5956
82420	1	35	4	4	1	1.27	27.6	2	2	539	31.5	32.85	17.1111	0.0078	0.0339	0.1012	0.288	0.1117	0.0177	0.296	0.041	0.8973
82432	1	60	4	2	1	2.4558	27.1	1	1	273	19.4	33.15	14.0722	0.0078	0.0339	0.017	0.0283	0.1117	0.0177	0.056	0.036	0.3084
82448	1	29	3	3	5	2.14	29.3	1	1	281	36.6	15.06	7.6776	0.153	0.0794	0.18	0.0283	0.1117	0.081	0.533	0.243	1.4094
82462	1	36	1	1	6	1.06	29.7	2	1	177.93	18.5	14.76	9.61784	0.0078	0.0339	0.017	0.781	0.1117	0.0177	0.062	0.024	1.0551
82464	1	62	3	3	3	4.28	22.8	1	1	758	18.3	73.48	41.4208	0.0078	0.0339	0.125	0.0283	0.1117	0.0177	0.146	0.093	0.5634
82466	1	80	3	5	2	4.35	30.4	2	2	266	28.5	66.27	9.33333	0.0078	0.0339	0.017	0.135	0.1117	0.0177	0.059	0.053	0.4351
82477	1	34	3	2	5	0.64	31.5	1	2	306	17.6	26.37	17.3864	0.0078	0.0339	0.017	0.117	0.1117	0.0177	0.162	0.098	0.5651
82479	1	27	5	3	6	2.57	22.6	1	1	805	36.6	29.23	21.9945	0.0078	0.0339	0.017	0.0283	0.1117	0.0177	0.066	0.024	0.3064
82487	1	21	1	4	5	2.3	20.8	2	1	495	22.9	20.54	21.6157	0.0078	0.0339	0.017	0.0283	0.1117	0.0177	0.079	0.065	0.3604
82488	1	63	3	4	1	5	25.5	1	1	536	22.4	61.23	23.9286	0.0078	0.0339	0.017	0.069	0.1117	0.0177	0.032	0.024	0.3131
82500	1	38	3	5	1	2.4558	35.5	2	1	246	14.9	33.29	16.5101	0.0078	0.0339	0.017	0.0283	0.1117	0.0177	0.054	0.036	0.3064
82509	1	63	1	2	1	1.27	29.7	2	1	452	32.4	91.84	13.9506	0.0078	0.0339	0.043	0.072	0.1117	0.0177	0.302	0.225	0.8131
82517	1	59	4	5	6	2.27	43.4	2	2	323	30.9	31.44	10.4531	0.0078	0.0339	0.017	0.0283	0.1117	0.0177	0.052	0.058	0.3264
82559	1	51	3	4	1	3.18	40.3	1	1	168	31.5	19.84	5.33333	0.0078	0.0339	0.017	0.0283	0.1117	0.0177	0.092	0.039	0.3474
82560	1	48	3	5	1	5	29.9	1	2	241	21.8	18.92	11.055	0.0078	0.0339	0.017	0.0283	0.1117	0.0177	0.06	0.046	0.3224
82561	1	30	3	3	5	0.86	19.8	1	1	420	12.2	38.63	34.4262	0.148	0.0339	0.206	0.0283	0.608	0.062	0.584	0.399	2.0692
82567	1	25	1	2	5	2.55	22.3	1	1	592	14.3	37.08	41.3986	0.022	0.0339	0.067	0.0283	0.1117	0.0177	0.329	0.128	0.7376
82569	1	46	3	3	6	0.37	28.7	1	1	260	24.2	22.18	10.7438	0.099	0.0339	0.164	0.043	0.1117	0.027	0.498	0.186	1.1626
82582	1	71	4	1	1	0.84	31.9	1	1	440.87	35	74.77	12.5963	0.0078	0.0339	0.117	0.0283	0.1117	0.0177	0.962	0.973	2.2514
82591	1	29	2	4	5	2.44	34.7	2	1	634.12	31.3	44.77	20.2594	0.0078	0.0339	0.017	0.107	0.1117	0.0177	0.043	0.024	0.3621
82604	1	49	3	5	3	2.4558	21.6	1	2	639	20.6	82.82	31.0194	0.0078	0.0339	0.017	0.0283	0.1117	0.0177	0.029	0.024	0.2694
82608	1	78	1	1	6	0.65	26.2	1	1	481	15.4	60.11	31.2338	0.028	0.0339	0.058	0.451	0.1117	0.0177	0.213	0.169	1.0823
82611	1	33	5	4	5	4.25	28.5	1	1	393	23	24.41	17.087	0.0078	0.054	0.017	0.093	0.1117	0.0177	0.091	0.244	0.6362
82615	1	57	4	4	1	5	34.1	2	2	495	50	73.01	9.9	0.0078	0.0339	0.017	0.045	0.1117	0.0177	0.036	0.024	0.2931
82618	1	45	3	4	1	1.92	33.1	2	1	337	22.1	18.79	15.2489	0.0078	0.0339	0.017	0.0283	0.1117	0.0177	0.074	0.05	0.3404
82629	1	41	3	3	1	0.63	35.3	2	1	391	18.9	57.48	20.6878	0.0078	0.0339	0.017	0.0283	0.1117	0.0177	0.06	0.051	0.3274
82637	1	80	3	3	1	2.09	37.3	1	1	156	27.3	27.04	5.71429	0.0078	0.0794	0.017	0.0283	0.1117	0.0177	0.05	0.04	0.3519
82644	1	25	5	4	1	1.52	26.8	1	1	625	25.7	33.52	24.3191	0.048	0.0339	0.079	0.0283	0.1117	0.031	0.221	0.106	0.6589
82651	1	78	4	1	1	0.75	39.4	1	1	236	26.2	39.6	9.00763	0.0078	0.103	0.017	1.24	0.1117	0.0177	0.0177	0.024	1.5389
82668	1	32	3	2	6	5	26.5	1	1	612	34.9	47.01	17.5358	0.033	0.0339	0.063	0.079	0.1117	0.0177	0.18	0.092	0.6103
82680	1	41	3	2	6	0.63	24.6	1	1	858	31.7	73.61	27.0662	0.78	0.0339	1.01	0.066	41.2	0.358	2.38	0.663	46.4909
82685	1	47	3	3	3	3.26	33.1	1	1	279	20.5	23.78	13.6098	0.16	0.0794	0.199	0.153	0.1117	0.06	0.685	0.288	1.7361
82691	1	29	3	2	4	0.26	29	1	1	544	24.1	27.01	22.5726	0.169	0.0794	0.207	0.324	0.1117	0.075	0.711	0.302	1.9791
82692	1	39	3	4	5	0.46	19.9	1	1	554	18.3	49.87	30.2732	0.031	0.0339	0.093	0.0283	0.1117	0.0177	0.423	0.391	1.1296
82695	1	20	3	2	1	0.89	28.2	1	2	575	28.7	37.53	20.0348	0.259	0.0794	0.1012	0.097	0.1117	0.167	0.296	0.423	1.5343
82703	1	50	5	4	6	1.22	27.2	1	2	385	20.4	44.88	18.8725	0.0078	0.0339	0.017	0.0283	0.1117	0.0177	0.063	0.048	0.3274
82720	1	58	5	4	1	1.4	23.9	2	1	266	11.4	42.11	23.3333	0.0078	0.0339	0.017	1.77	0.1117	0.0177	0.094	0.071	2.1231
82721	1	49	3	3	1	3.22	23.4	1	1	347.17	19.7	33.63	17.6228	0.111	0.0339	0.199	0.0283	0.1117	0.056	0.489	0.185	1.2139
82736	1	26	3	4	5	0.1	19.1	1	1	544	21	49.06	25.9048	0.132	0.0339	0.136	0.0283	0.1117	0.067	0.296	0.18	0.9849
82740	1	65	4	2	2	3	23.3	2	1	1030	53.1	196.5	19.3974	0.033	0.0339	0.085	0.0283	0.1117	0.0177	0.235	0.067	0.6116
82756	1	55	3	5	6	5	24	2	2	452	29.6	56.11	15.2703	0.0078	0.0339	0.017	0.0283	0.1117	0.0177	0.065	0.024	0.3054
82758	1	52	3	3	3	0.96	33.5	1	1	371	23.4	39.68	15.8547	0.162	0.0339	0.434	0.0283	0.1117	0.13	0.912	0.282	2.0939
82771	1	41	3	3	1	0.97	36.8	1	1	621	36.3	57.25	17.1074	0.18	0.0339	0.208	0.0283	0.1117	0.075	0.296	0.237	1.1699
82775	1	57	2	4	1	2.4558	27.2	1	1	525	20.6	56.31	25.4854	0.106	0.05	0.144	0.278	0.1117	0.058	0.431	0.176	1.3547
82776	1	37	5	3	1	2.16	23.6	1	1	676	20.6	61.23	32.8155	0.119	0.0339	0.187	0.0283	0.1117	0.093	0.46	0.159	1.1919
82782	1	53	2	3	5	3.11	25.8	1	1	602.79	27.4	51.63	21.9996	0.0078	0.0339	0.027	0.811	0.1117	0.0177	0.26	0.347	1.6161
82788	1	43	5	5	1	5	21.4	2	1	480.25	30.1	45.08	15.9551	0.0078	0.0339	0.017	0.416	0.1117	0.0177	0.04	0.024	0.6681
82790	1	72	3	3	1	1.55	29.2	2	1	432.96	2.117	40.66	204.516	0.0078	0.0339	0.017	0.0283	0.1117	0.0177	0.049	0.024	0.2894
82802	1	76	3	5	1	2.4558	20.9	2	1	424	16.5	95.75	25.697	0.0078	0.0339	0.017	0.0283	0.1117	0.0177	0.097	0.063	0.3764
82812	1	62	4	4	3	1.3	17.7	1	1	585	13.3	75.01	43.985	0.062	0.0339	0.538	0.0283	0.1117	0.036	0.523	0.216	1.5489
82820	1	78	3	4	1	2.27	26.9	2	2	371	25.1	60.79	14.7809	0.0078	0.0339	0.017	0.0283	0.1117	0.0177	0.052	0.024	0.2924
82841	1	45	5	4	1	2.52	25.4	2	2	254	17.2	15.29	14.7674	0.0078	0.0339	0.017	0.289	0.1117	0.0177	0.048	0.044	0.5691
82854	1	68	1	2	3	1.13	31.9	1	1	257	24.8	29.16	10.3629	0.0078	0.0339	0.017	0.118	0.1117	0.0177	0.059	0.056	0.4211
82855	1	80	3	3	1	2.15	25.8	2	2	304	39.1	20.93	7.77494	0.0078	0.0339	0.017	0.055	0.1117	0.0177	0.109	0.097	0.4491
82864	1	31	3	3	6	2.4558	20.2	1	1	690	15.5	102.4	44.5161	0.116	0.0339	0.252	0.0283	0.1117	0.083	0.662	0.316	1.6029
82876	1	80	5	3	1	1.14	28.6	1	1	330	28.2	49.69	11.7021	0.0078	0.0339	0.017	0.0283	0.1117	0.0177	0.107	0.093	0.4164
82900	1	80	3	3	1	3.81	25.5	2	1	166	14.7	48.34	11.2925	0.0078	0.0339	0.017	0.0283	0.1117	0.0177	0.064	0.024	0.3044
82913	1	28	4	3	5	4.88	18.8	1	1	947	22.9	77.3	41.3537	0.138	0.0339	0.18	0.218	0.1117	0.048	0.41	0.142	1.2816
82917	1	42	5	5	1	5	30.7	2	2	323	21.6	27.14	14.9537	0.0078	0.0339	0.017	0.0283	0.1117	0.0177	0.231	0.151	0.5984
82925	1	38	5	5	1	5	28	1	1	367	30	23.31	12.2333	0.0078	0.0339	0.017	0.138	0.1117	0.0177	0.041	0.024	0.3911
82931	1	70	2	2	1	0.2	28.9	1	1	388.68	38.2	27.89	10.1749	0.0078	0.0339	0.017	1.27	0.1117	0.0177	0.07	0.059	1.5871
82933	1	29	5	5	1	5	35	2	1	341	17	25.65	20.0588	0.0078	0.0339	0.017	0.171	0.1117	0.0177	0.048	0.103	0.5101
82939	1	23	4	4	5	1.99	35.1	2	1	443.8	24.4	23.8	18.1885	0.0078	0.0339	0.017	0.066	0.1117	0.0177	0.07	0.054	0.3781
82953	1	68	3	5	1	5	17.7	2	1	381	11.1	68.34	34.3243	0.0078	0.0339	0.017	0.0283	0.1117	0.0177	0.071	0.062	0.3494
82959	1	55	4	2	4	2.4558	21.8	1	1	493.55	25.8	41.83	19.1298	0.079	0.0339	0.194	0.079	2.85	0.0177	0.272	0.061	3.5866
82969	1	54	1	3	3	0.77	41.7	1	1	313	29.9	33.02	10.4682	0.066	0.0339	0.108	32.7	0.1117	0.054	0.394	0.139	33.6066
82974	1	54	1	1	1	2.4558	25.5	1	1	487	13.1	60.69	37.1756	0.111	0.0339	0.155	0.0283	0.1117	0.058	0.532	0.19	1.2199
82987	1	60	3	3	1	2.54	36.4	2	1	309	48.4	41.61	6.3843	0.0078	0.0339	0.017	0.0283	0.1117	0.0177	0.069	0.047	0.3324
82990	1	66	1	1	1	1.1	26.6	1	1	525	18.8	54.17	27.9255	0.0078	0.0339	0.017	0.0283	0.1117	0.0177	0.051	0.024	0.2914
82995	1	72	3	3	1	3.03	23.9	1	1	535.78	29.6	73.32	18.1007	0.069	0.0339	0.098	0.0283	0.1117	0.031	0.329	0.119	0.8199
82999	1	35	1	4	1	1.94	28.6	2	1	459	21.8	31.1	21.055	0.0078	0.0339	0.017	0.0283	0.1117	0.0177	0.054	0.024	0.2944
83004	1	34	3	2	3	2.19	23.4	1	1	280	15.2	22.89	18.4211	0.0078	0.0339	0.036	0.0283	0.1117	0.0177	0.137	0.625	0.9974
83009	1	24	2	3	5	2.79	24	2	1	508	21.1	29.88	24.0758	0.0078	0.135	0.017	0.0283	0.1117	0.0177	0.053	0.1668	0.5373
83048	1	48	3	3	3	4.5	32.1	2	1	525	26.7	32.22	19.6629	0.0078	0.0339	0.017	0.0283	0.1117	0.0177	0.08	0.049	0.3454
83064	1	41	4	4	5	2.14	35.2	2	2	329	27.4	28.32	12.0073	0.0078	0.0339	0.017	7.71	0.1117	0.0177	0.07	0.042	8.0101
83078	1	32	3	5	1	4.61	30.3	2	1	353	22.1	19.28	15.9729	0.0078	0.0339	0.017	0.0283	0.1117	0.0177	0.028	0.024	0.2684
83081	1	41	3	2	1	0.47	42.1	1	1	641.97	33	98.74	19.4536	0.0078	0.0339	0.043	0.094	1.17	0.0177	0.081	0.067	1.5144
83082	1	27	4	3	5	2.18	29.9	2	1	288.46	20.2	23.44	14.2802	0.0078	0.0339	0.017	1.08	0.1117	0.0177	0.058	0.024	1.3501
83087	1	39	3	4	5	5	35	1	1	362	30.8	35.28	11.7532	0.237	0.0339	0.308	0.476	0.1117	0.151	0.828	0.312	2.4576
83092	1	57	1	3	1	5	26.8	2	1	305	15.2	51.28	20.0658	0.0078	0.0339	0.017	0.0283	0.1117	0.0177	0.073	0.062	0.3514
83097	1	51	3	5	1	4.3	22.1	2	1	485	24.3	46.83	19.9588	0.0078	0.06	0.017	0.085	0.1117	0.0177	0.036	0.037	0.3722
83099	1	32	5	3	1	1.7	20.6	1	1	313.58	17.8	15.5	17.6169	0.126	0.0339	0.138	0.047	0.1117	0.07	0.41	0.167	1.1036
83104	1	59	5	4	1	4.25	22.7	1	1	564	21	41.26	26.8571	0.159	0.0339	0.187	0.053	0.1117	0.088	0.662	0.267	1.5616
83109	1	80	3	5	5	1.74	19.6	2	1	430.84	27.1	103	15.8982	0.0078	0.0339	0.017	0.0283	0.1117	0.0177	0.054	0.024	0.2944
83114	1	69	3	2	5	2.83	28.8	1	1	426	27.9	47.48	15.2688	0.0078	0.0339	0.017	0.153	0.1117	0.0177	0.044	0.042	0.4271
83128	1	35	4	4	1	2.4558	30.4	1	1	314.39	18	30.82	17.4661	0.0078	0.0339	0.032	0.0283	0.1117	0.0177	0.071	0.054	0.3564
83130	1	38	5	5	1	4.19	31	2	2	247	28.2	18.08	8.75887	0.0078	0.0339	0.017	0.0283	0.1117	0.0177	0.0177	0.024	0.2581
83138	1	54	4	4	3	4.28	30.7	1	1	515	24.6	26.63	20.935	0.184	0.082	0.332	0.244	0.1117	0.139	0.94	0.307	2.3397
83143	1	71	4	3	5	2.4558	26.3	2	2	510	24.9	59.8	20.4819	0.163	0.0339	0.903	0.0283	0.1117	0.16	0.296	0.1668	1.8627
83146	1	67	2	2	1	1.72	28.8	1	1	579	38.5	36.44	15.039	0.019	0.0339	0.025	0.088	0.1117	0.0177	0.238	0.084	0.6173
83148	1	54	4	2	3	0.04	22.9	1	1	274	32.8	46.01	8.35366	0.127	0.0339	0.167	0.0283	0.309	0.026	0.528	0.188	1.4072
83152	1	27	4	4	5	2.02	26.4	1	1	791	41.2	44.28	19.199	0.032	0.0794	0.096	4.78	0.1117	0.026	0.184	0.075	5.3841
83153	1	20	5	4	5	0	18.6	1	1	632	15	33.74	42.1333	0.02	0.0339	0.067	0.0283	0.1117	0.0177	0.136	0.09	0.5046
83157	1	31	5	5	5	5	29.6	2	2	415	33	21.28	12.5758	0.0078	0.0339	0.017	0.24	0.1117	0.0177	0.032	0.024	0.4841
83158	1	38	3	5	1	5	23.3	1	1	397	18.3	34.31	21.694	0.0078	0.0339	0.017	0.0283	0.1117	0.0177	0.072	0.042	0.3304
83172	1	23	1	2	5	0.63	28.7	1	1	336	26	19.54	12.9231	0.0078	0.0339	0.017	0.041	0.1117	0.0177	0.125	0.309	0.6631
83183	1	76	1	2	1	2.4558	32.3	1	1	305	30.4	73.61	10.0329	0.0078	0.0339	0.017	0.212	0.1117	0.0177	0.12	0.145	0.6651
83187	1	65	3	4	3	1.22	20.7	1	1	541	27.9	93.87	19.3907	0.141	0.0339	0.181	0.8817	0.1117	0.075	0.552	0.261	2.2373
83202	1	73	3	5	1	5	33.1	1	1	260	24.2	45.92	10.7438	0.0078	0.063	0.017	0.04	0.1117	0.0177	0.055	0.084	0.3962
83206	1	36	3	5	5	5	28.6	2	1	368	25.9	36.76	14.2085	0.0078	0.071	0.017	0.0283	0.1117	0.0177	0.07	0.046	0.3695
83218	1	52	3	1	1	1.16	25.4	1	1	495.4	20.9	79.34	23.7033	0.074	16	0.31	0.0283	0.1117	0.103	0.734	1.56	18.921
83233	1	51	5	5	3	0.87	19.5	1	1	1130	29.5	133.1	38.3051	0.057	0.0339	0.091	0.0283	0.1117	0.029	0.274	0.188	0.8129
83250	1	66	5	4	6	1.06	28	2	1	411	37.8	56.31	10.873	0.0078	0.0794	0.1012	0.151	0.1117	0.0177	0.296	0.024	0.7888
83268	1	25	3	4	1	2.4558	27.3	1	2	524	19	37.66	27.5789	0.035	0.0794	0.097	0.052	0.1117	0.031	0.199	0.082	0.6871
83271	1	21	3	2	6	2.27	24.9	1	1	275	22.9	20.8	12.0087	0.058	0.0339	0.073	0.0283	0.1117	0.0177	0.296	0.08	0.6986
83277	1	51	4	2	5	1.07	22.7	1	1	406	36.3	33.9	11.1846	0.081	0.0339	0.122	0.049	0.1117	0.047	0.289	0.16	0.8936
83280	1	39	3	3	1	5	37.1	1	1	158	17.6	17.02	8.97727	0.0078	0.495	0.017	0.0283	0.1117	0.0177	0.089	0.045	0.8115
83285	1	29	3	4	1	1.16	24.5	2	1	354.79	14.9	51.85	23.8114	0.0078	0.0339	0.017	0.097	0.1117	0.0177	0.038	0.024	0.3471
83291	1	38	5	4	6	1.09	30.1	1	1	312	22.9	21.45	13.6245	0.051	0.0794	0.062	0.0283	0.1117	0.043	0.206	0.073	0.6544
83299	1	66	3	4	1	3.37	27.2	2	1	468	25.9	44.59	18.0695	0.0078	0.0339	0.017	0.042	0.1117	0.0177	0.08	0.066	0.3761
83311	1	63	3	4	3	0.98	28	2	1	583	26.4	78.45	22.0833	0.0078	0.0339	0.017	0.0283	0.1117	0.0177	0.03	0.04	0.2864
83320	1	63	1	1	1	0.61	31.2	1	1	517	25.3	75.29	20.4348	0.0078	0.0339	0.017	0.0283	8.84	0.0177	0.091	0.024	9.0597
83334	1	27	4	3	6	1.27	25.6	2	1	400.21	23.6	17.04	16.9581	0.0078	0.0794	0.017	16.2	0.1117	0.0177	0.083	0.024	16.5406
83351	1	63	3	2	1	2.71	35.6	1	1	469.6	31.7	48.61	14.8139	0.0078	0.0339	0.017	0.067	0.1117	0.0177	0.053	0.036	0.3441
83363	1	28	3	4	5	0.92	27.5	1	1	695.69	28.5	44.21	24.4102	0.0078	0.0339	0.017	0.0283	0.1117	0.0177	0.087	0.046	0.3494
83374	1	61	3	5	3	5	34.6	1	1	296	21.8	36.55	13.578	0.0078	0.0339	0.017	0.0283	0.1117	0.0177	0.059	0.089	0.3644
83381	1	59	5	3	3	1.31	36.6	1	1	770	36.4	31.31	21.1538	0.035	0.0339	0.117	0.0283	0.1117	0.029	0.373	0.176	0.9039
83382	1	44	3	5	1	5	27.1	2	1	547	25.1	33.14	21.7928	0.0078	0.0339	0.1012	0.0283	0.1117	0.0177	0.296	0.052	0.6486
83389	1	30	3	4	5	3.54	35.7	2	1	528	37.7	42.12	14.0053	0.0078	0.0339	0.017	0.068	0.1117	0.0177	0.064	0.024	0.3441
83396	1	21	5	2	5	0.88	16.7	1	1	559.94	21.4	54.59	26.1654	0.034	0.048	0.072	1.64	0.1117	0.0177	0.268	0.08	2.2714
83408	1	36	3	4	5	1.11	22.5	1	2	284	7.4	38.61	38.3784	0.027	0.0339	0.096	0.8817	0.1117	0.028	0.369	0.167	1.7143
83414	1	47	1	1	1	5	36.8	1	1	545.92	26.3	45.51	20.7574	0.0078	0.0339	0.017	0.056	0.1117	0.078	0.061	0.024	0.3894
83439	1	30	5	5	5	3.43	24.6	2	1	588	19.4	32.71	30.3093	0.0078	0.0339	0.017	0.176	0.1117	0.0177	0.106	0.046	0.5161
83447	1	32	2	5	5	2.4558	38.2	1	1	482	35.8	31.23	13.4637	0.0078	0.0339	0.017	0.0283	0.1117	0.0177	0.063	0.059	0.3384
83450	1	68	2	2	6	0.58	29.4	2	2	339	19.6	45.76	17.2959	0.0078	0.0339	0.017	0.071	0.1117	0.0177	0.085	0.071	0.4151
83467	1	20	4	2	5	2.4558	25	2	2	562	27	25.11	20.8148	0.0078	0.0339	0.017	0.129	0.1117	0.0177	0.029	0.024	0.3701
83476	1	22	1	4	5	0.3	23	1	1	653	28.7	19.52	22.7526	0.032	0.0339	0.09	0.0283	0.1117	0.036	0.22	0.115	0.6669
83481	1	80	4	1	2	2.4558	32.9	2	2	307.67	34.6	54.21	8.8922	0.0078	0.0339	0.017	0.114	0.1117	0.0177	0.139	0.064	0.5051
83492	1	22	5	3	5	1.52	24.3	2	1	336	13.9	29.7	24.1727	0.0078	0.0339	0.017	0.269	0.1117	0.0177	0.055	0.024	0.5361
83525	1	33	3	3	5	4.51	35.7	2	1	266	31.8	22.45	8.36478	0.0078	0.0339	0.017	0.0283	0.1117	0.0177	0.045	0.024	0.2854
83535	1	69	4	4	3	0.69	31.7	1	1	715	42.6	76.3	16.784	0.047	0.0339	0.241	0.0283	0.1117	0.036	0.374	0.126	0.9979
83541	1	44	1	2	1	0.89	27.1	2	2	418	29.6	20.84	14.1216	0.0078	0.073	0.017	0.258	0.1117	0.0177	0.043	0.024	0.5522
83546	1	59	3	5	1	5	26.4	2	1	466	31.3	27.92	14.8882	0.0078	0.0339	0.017	0.0283	0.1117	0.0177	0.043	0.024	0.2834
83565	1	34	5	3	5	2.12	34.9	1	1	377	32.2	26.18	11.7081	0.084	0.0339	0.127	0.0283	0.1117	0.046	0.39	0.14	0.9609
83567	1	68	4	2	4	2.78	23.6	1	1	519	28.8	76.66	18.0208	0.126	0.0339	0.167	0.232	0.1117	0.062	0.504	0.217	1.4536
83575	1	20	4	2	5	0.31	22.6	1	1	579	47.1	51.55	12.293	0.042	0.0339	0.074	0.409	0.1117	0.033	0.188	0.07	0.9616
83585	1	43	3	4	1	0.87	37.3	1	1	364.09	17	49.16	21.4171	0.0078	0.0339	0.044	0.058	3.69	0.0177	0.104	0.075	4.0304
83589	1	59	3	5	1	4.84	26.6	1	1	846	38.9	69.95	21.7481	0.015	0.0339	0.204	0.065	0.1117	0.0177	0.249	0.179	0.8753
83590	1	77	4	3	1	3.87	36	2	2	393.86	25.4	64.22	15.5063	0.0078	0.0794	0.017	0.063	0.1117	0.0177	0.236	0.057	0.5896
83595	1	63	4	3	3	2.06	33.9	2	2	236	31.6	36.9	7.46835	0.0078	0.0339	0.017	6.51	0.1117	0.0177	0.0177	0.024	6.7398
83604	1	60	5	2	1	5	24.5	1	1	369	28.9	28.88	12.7682	0.0078	0.0339	0.017	0.0283	0.1117	0.0177	0.0177	0.024	0.2581
83612	1	72	3	5	1	5	30.5	1	1	443	32.5	39.55	13.6308	0.066	0.0339	0.109	0.0283	0.1117	0.038	0.371	0.169	0.9269
83613	1	23	3	2	5	2.27	23.8	1	1	462	22.4	32.16	20.625	0.0078	0.0339	0.017	0.0283	0.1117	0.0177	0.038	0.024	0.2784
83614	1	62	4	3	5	2.94	23.1	1	2	608	22.9	60.2	26.5502	0.056	0.0339	0.094	0.0283	0.1117	0.034	0.299	0.123	0.7799
83615	1	80	3	5	1	5	24.9	2	2	441	33.3	79.78	13.2432	0.0078	0.0339	0.017	0.12	0.1117	0.0177	0.104	0.063	0.4751
83618	1	40	2	3	1	4.19	29.4	1	1	381	22.6	40.08	16.8584	0.18	0.0339	0.418	0.0283	0.1117	0.168	1.14	0.486	2.5659
83619	1	31	3	4	1	5	26.7	2	1	395	13.1	25.51	30.1527	0.0078	0.0339	0.017	0.0283	0.1117	0.0177	0.081	0.051	0.3484
83627	1	49	3	3	3	2.65	28.5	1	1	560	36.2	59.3	15.4696	0.414	0.0339	0.815	0.0283	7.7	0.163	1.4	0.548	11.1022
83632	1	47	3	4	1	0.7	29.1	1	1	573	10.5	67.03	54.5714	0.174	0.0339	0.248	9.55	0.1117	0.089	0.66	0.231	11.0976
83633	1	45	3	5	1	5	29.7	1	1	268	19.9	25.7	13.4673	0.022	0.0339	0.045	0.0283	0.1117	0.0177	0.135	0.052	0.4456
83634	1	51	3	2	1	0.95	27.5	1	1	442	20.9	61.47	21.1483	0.017	0.0339	0.029	3.06	0.1117	0.0177	0.203	0.098	3.5703
83637	1	40	1	3	6	2.25	48	2	1	359	36.9	30.82	9.729	0.0078	0.0339	0.017	0.0283	0.4074	0.0177	0.036	0.024	0.5721
83638	1	80	3	5	1	5	24.2	1	1	73.3	5.12	57.39	14.3164	0.0078	0.0339	0.017	0.153	0.1117	0.0177	0.296	0.069	0.7061
83642	1	33	5	3	6	2.4558	27.4	1	1	418	28.9	25.66	14.4637	0.0078	0.0339	0.017	0.0283	0.1117	0.0177	0.1	0.083	0.3994
83646	1	56	4	2	5	0.77	21.7	1	2	879	19.7	92.74	44.6193	0.145	0.0339	0.274	0.0283	0.1117	0.09	0.87	0.386	1.9389
83660	1	69	1	5	1	5	29.5	2	1	507	27	46.57	18.7778	0.0078	0.0339	0.017	0.0283	0.1117	0.0177	0.049	0.036	0.3014
83664	1	37	4	3	5	0.86	19.7	1	1	589	24.8	63.48	23.75	0.308	0.0339	0.627	0.0283	3.09	0.15	1.09	0.339	5.6662
83672	1	36	4	4	3	0.51	35.7	2	1	421.89	25.5	31.27	16.5447	0.0078	0.0339	0.017	0.041	0.1117	0.0177	0.0177	0.024	0.2708
83674	1	40	3	5	1	4.19	32.8	2	1	465	24.6	51.86	18.9024	0.0078	0.0339	0.017	0.131	0.1117	0.0177	0.054	0.024	0.3971
83692	1	68	4	3	5	1.08	19.1	1	1	763	32.7	84.79	23.3333	0.223	0.0339	0.311	0.041	0.1117	0.09	0.692	0.23	1.7326
83709	1	24	3	2	5	3.63	24.3	2	1	453.23	28.7	28.97	15.792	0.0078	0.0339	0.017	0.157	0.1117	0.0177	0.084	0.085	0.5141
83712	1	61	3	2	1	2.04	30	2	1	357	19.1	35.78	18.6911	0.0078	0.0339	0.017	0.0283	0.1117	0.0177	0.079	0.024	0.3194
83715	1	58	3	1	5	0.94	26.3	1	1	375	18.2	37.52	20.6044	0.172	0.0339	0.309	0.077	0.1117	0.135	0.686	0.255	1.7796
83720	1	36	4	4	5	2.9	23.9	2	2	945.27	38.9	74.88	24.3	0.047	0.0339	0.121	15	0.1117	0.0177	0.403	0.168	15.9023
83724	1	80	3	3	1	3.09	24.9	1	1	215	9.95	52.58	21.608	0.0078	0.0339	0.017	0.068	0.1117	0.0177	0.129	0.024	0.4091
83732	1	62	3	5	1	4.39	27.8	1	1	367	19.9	42.86	8.56276	0.008	0.034	0.039	0.028	0.112	0.018	0.041	0.024	0.304
83733	1	53	3	3	3	1.32	30.8	1	1	505	28.3	29.04	17.3898	0.104	0.034	0.326	0.028	0.112	0.032	0.711	0.194	1.541
83734	1	78	3	3	1	1.51	28.8	1	1	104	12.7	27.02	3.849	0.008	0.034	0.017	0.028	0.112	0.018	0.055	0.072	0.344
83741	1	22	4	4	5	2.08	28	1	1	543	34.4	21.76	24.954	0.008	0.034	0.017	0.042	0.112	0.018	0.11	0.081	0.422
83744	1	56	4	3	3	1.19	33.6	2	1	685	31.9	73.08	9.37329	0.008	0.034	0.034	0.235	0.112	0.018	0.039	0.048	0.528
83747	1	46	3	5	6	0.75	27.6	1	1	336	15.6	35.35	9.50495	0.066	0.034	0.172	0.028	0.112	0.031	0.338	0.121	0.902
83777	1	56	5	2	1	1.35	25	2	2	310	19.8	34.44	9.00116	0.008	0.034	0.044	0.028	0.112	0.018	0.066	0.024	0.334
83784	1	22	2	4	5	2.4558	25.3	1	1	468	23.1	34.46	13.581	0.008	0.034	0.118	0.028	0.112	0.018	0.172	0.1	0.59
83790	1	56	3	1	1	1	24.4	1	2	550	17.5	48.84	11.2613	0.115	0.034	0.243	0.058	0.112	0.07	0.6	0.233	1.465
83813	1	24	3	4	3	2.89	26.9	1	1	763	48.8	37.25	20.4832	0.081	0.034	0.206	0.352	0.112	0.042	0.838	0.537	2.202
83816	1	27	3	4	6	0	18.6	2	1	738	34.9	62.54	11.8004	0.008	0.092	0.096	0.042	0.112	0.018	0.144	0.075	0.587
83820	1	70	3	5	6	4.18	27	1	1	517	19.6	58.13	8.89386	0.008	0.034	0.017	0.135	0.112	0.018	0.075	0.068	0.467
83827	1	61	4	3	1	4.39	29.5	1	1	823	40.8	88.87	9.26072	0.008	0.034	0.046	0.028	0.112	0.018	0.098	0.142	0.486
83829	1	50	5	5	1	5	22.6	2	1	300	20	39.93	7.51315	0.008	0.034	0.017	0.103	0.112	0.018	0.029	0.035	0.356
83844	1	27	1	2	6	1.41	23.1	2	1	1070	26.2	67.57	15.8354	0.008	0.034	0.017	0.064	0.112	0.018	0.042	0.024	0.319
83849	1	71	2	4	1	1.34	27.6	1	1	112	10.8	24.64	4.54545	0.045	0.034	0.136	0.086	0.112	0.044	0.418	0.15	1.025
83856	1	30	3	4	1	1.9	27	1	1	264	23	15.16	17.4142	0.008	0.034	0.017	0.028	0.112	0.018	0.055	0.05	0.322
83860	1	41	4	4	1	5	40.7	1	1	356	28.2	20.5	17.3659	0.151	0.034	0.305	4.06	0.112	0.132	0.718	0.287	5.799
83863	1	35	1	3	1	2.64	31.1	2	1	520	21.4	64.18	8.10221	0.008	0.034	0.09	0.065	0.112	0.018	0.223	0.088	0.638
83884	1	61	1	3	1	0.62	22.3	1	1	674	23.9	115.4	5.84055	0.034	0.034	0.073	0.028	0.112	0.018	0.21	0.153	0.662
83889	1	26	3	5	6	4.25	24.3	1	1	289	11.9	26.32	10.9802	0.008	0.034	0.046	0.028	0.112	0.018	0.101	0.053	0.4
83894	1	60	4	3	1	1.23	19.7	1	1	266	15.3	67.97	3.91349	0.152	0.034	1.2	0.678	32	0.115	2.21	0.702	37.091
83899	1	27	3	1	1	1.57	24	2	1	542	16.2	43.41	12.4856	0.008	0.034	0.099	0.055	0.112	0.018	5.1	3.91	9.336
83902	1	49	3	4	1	5	25.5	2	1	424	16.3	34.47	12.3006	0.008	0.034	0.017	0.028	0.112	0.018	0.08	0.055	0.352
83908	1	51	4	3	1	1.43	24.7	2	1	347	24.7	29.11	11.9203	0.008	0.034	0.017	0.069	0.112	0.018	0.037	0.024	0.319
83910	1	37	3	3	6	4.37	22.9	1	1	560	22	74.17	7.55022	0.28	0.034	0.455	0.041	0.112	0.103	1.11	0.425	2.56
83926	1	66	3	4	1	3.43	26.8	1	1	326	20.7	33.62	9.69661	0.162	0.034	0.21	0.028	0.112	0.068	0.62	0.255	1.489
83931	1	37	2	2	4	2.08	26	1	1	506	23.6	32.21	15.7094	0.071	0.034	0.17	0.028	0.112	0.072	0.378	0.133	0.998
83941	1	71	2	3	1	2.4558	24.8	1	1	384	20.1	87.67	4.38006	0.008	0.034	0.036	14.8	0.112	0.018	0.032	0.024	15.064
83951	1	24	4	2	5	2.98	21	1	1	645	22.7	56.2	11.4769	0.032	0.034	0.059	0.056	0.112	0.018	0.205	0.06	0.576
83954	1	53	3	3	1	5	25.9	1	1	881	25.2	96.81	9.1003	0.225	0.034	0.255	0.028	0.112	0.098	0.738	0.347	1.837
83955	1	47	4	4	1	4.48	30.1	2	1	391	40.3	34.42	11.3597	0.008	0.034	0.042	0.028	0.112	0.018	0.06	0.215	0.517
83967	1	40	5	5	1	5	21.3	1	1	880	51.7	136.9	6.42805	0.008	0.034	0.017	0.028	0.112	0.018	0.035	0.024	0.276
83976	1	80	3	4	2	2.02	26	1	1	617	31.1	105.5	5.84834	0.008	0.034	0.017	0.028	0.112	0.018	0.018	0.024	0.259
83982	1	25	3	5	5	3.07	23	2	1	585	23.3	34.08	17.1655	0.008	0.034	0.017	0.028	0.112	0.018	0.032	0.024	0.273
83987	1	68	1	1	1	0.35	30.5	1	1	411	34.3	50.72	8.10331	0.047	0.034	0.105	0.028	0.112	0.018	0.234	0.123	0.701
83988	1	21	1	3	5	1.76	33	1	1	438	47.8	20.24	21.6403	0.008	0.034	0.052	0.028	0.112	0.018	0.212	0.224	0.688
83992	1	68	5	5	1	5	22.6	1	2	154	12.7	20.26	7.60118	0.008	0.034	0.017	0.541	0.112	0.018	0.029	0.024	0.783
84011	1	32	3	4	1	1.43	37.7	1	1	263	32.3	16.55	15.8912	0.008	0.034	0.017	0.028	0.112	0.018	0.071	0.061	0.349
84018	1	27	3	5	5	5	29.6	1	1	679	22.7	41.36	16.4168	0.042	0.034	0.05	0.157	0.112	0.018	0.265	0.098	0.776
84026	1	44	5	4	6	0.35	44.7	2	1	162	25.5	22.63	7.15864	0.008	0.034	0.017	0.779	0.112	0.018	0.1	0.024	1.092
84030	1	46	1	1	1	2.4558	25.1	2	1	420	22.8	24.38	17.2272	0.008	0.034	0.035	7.5	0.112	0.018	0.081	0.055	7.843
84032	1	51	1	4	4	2.4558	26.8	1	1	467	25.3	35.67	13.0922	0.115	0.064	0.18	2.31	0.112	0.029	0.615	0.2	3.625
84037	1	66	3	5	1	5	24.8	2	2	1040	18	97.66	10.6492	0.008	0.034	0.017	0.028	0.112	0.018	0.048	0.024	0.289
84042	1	75	3	2	1	1.97	19.3	1	1	525	35.4	52.76	9.95072	0.008	0.034	0.059	0.028	0.112	0.018	0.29	0.479	1.028
84070	1	40	3	4	5	4.08	29.4	1	1	436	32.8	34.72	12.5576	0.412	0.034	0.826	0.028	4.64	0.223	1.72	0.382	8.265
84087	1	36	5	5	6	5	22.6	1	1	587	24	46.71	12.5669	0.008	0.05	0.017	0.043	0.112	0.018	0.076	0.048	0.372
84089	1	53	3	4	2	2.95	23.3	1	1	885	37.4	140.5	6.29893	0.767	0.034	0.858	0.233	0.112	0.346	2.3	0.762	5.412
84098	1	26	4	3	5	0.95	21.4	1	1	361	17.3	47.55	7.59201	0.117	0.034	0.477	1.23	12.3	0.126	0.783	0.183	15.25
84099	1	74	1	2	1	1.79	32	1	1	209	22.2	30.75	6.79675	0.008	0.034	0.017	0.088	0.112	0.018	0.089	0.036	0.402
84101	1	80	3	5	1	3.75	34.6	1	1	153	21.9	84.5	1.81065	0.008	0.098	0.017	0.028	0.112	0.018	0.039	0.024	0.344
84106	1	57	5	5	1	5	24.6	1	2	424	35.7	37.04	11.4471	0.008	0.034	0.044	0.248	0.112	0.018	0.07	0.041	0.575
84109	1	66	3	5	1	5	27.3	1	1	489	38.1	43.53	11.2336	0.008	0.034	0.017	0.028	0.112	0.018	0.051	0.024	0.292
84110	1	28	1	4	6	0.81	27	1	1	420	18.1	24.03	17.4782	0.008	0.034	0.024	0.046	0.112	0.018	0.059	0.024	0.325
84111	1	58	2	4	5	2.4558	36.1	1	1	523	35	53.62	9.75382	0.011	0.034	0.058	0.028	0.112	0.018	0.103	0.065	0.429
84122	1	54	2	2	6	2.12	39.4	1	1	198	16.5	24.23	8.17169	0.008	0.129	0.017	0.111	0.112	0.018	0.046	0.024	0.465
84129	1	80	5	1	1	0.81	20.3	1	1	857	29.1	111.9	7.65862	0.132	0.034	0.185	0.197	0.112	0.056	0.535	0.242	1.493
84142	1	24	3	3	5	5	32.8	2	1	337	38.3	14.29	23.5829	0.008	0.034	0.037	0.028	0.112	0.018	0.116	0.086	0.439
84157	1	45	3	4	5	2.4558	38	2	2	421	40.3	65.66	6.41182	0.008	0.034	0.032	0.028	0.112	0.018	0.018	0.024	0.274
84165	1	57	1	1	1	1.96	31.1	1	1	685	22.4	67.92	10.0854	0.008	0.034	0.051	0.028	5.05	0.018	0.226	0.181	5.596
84168	1	61	5	1	1	1.09	16.4	1	2	339	17.5	53.65	6.31873	0.008	0.034	0.017	0.465	0.112	0.018	0.093	0.034	0.781
84181	1	35	4	3	6	0.04	30.4	1	1	430	17.1	26.36	16.3126	0.128	0.034	0.299	0.797	0.112	0.085	0.8	0.358	2.613
84196	1	32	5	2	1	1.72	23.5	1	1	704	35.5	38.92	18.0884	0.016	0.034	0.031	0.028	0.112	0.018	0.079	0.039	0.357
84197	1	59	3	5	1	5	35.4	2	1	447	25.4	49.35	9.05775	0.008	0.034	0.017	0.028	0.112	0.018	0.158	0.092	0.467
84205	1	51	4	3	1	1.38	26.2	1	1	390	11	40.66	9.59174	0.106	0.034	0.225	0.474	0.112	0.081	0.48	0.219	1.731
84218	1	56	3	4	1	5	23.6	1	1	357	26.9	32.88	10.8577	0.715	0.034	1.02	0.116	25.2	0.318	2.2	0.683	30.286
84226	1	64	4	3	1	1.19	25	1	1	761	36	72.56	10.4879	0.047	0.034	0.112	0.151	0.112	0.018	0.462	0.169	1.105
84239	1	74	3	5	1	5	26.9	2	1	253	15.3	39.01	6.48552	0.008	0.034	0.017	0.132	0.112	0.018	0.058	0.046	0.425
84241	1	50	3	1	5	2.4558	47.1	1	1	122	27.3	18.79	6.49282	0.154	0.034	0.239	0.074	0.112	0.13	0.544	0.188	1.475
84260	1	60	5	1	1	1.26	24.6	1	2	403	17.2	31.28	12.8836	0.008	0.034	0.075	0.028	0.112	0.018	0.081	0.069	0.425
84265	1	76	1	1	1	0.49	27.7	1	1	210	11.6	28.93	7.2589	0.041	0.034	0.054	0.028	0.112	0.018	0.257	0.127	0.671
84271	1	67	3	5	1	1.84	36.9	1	1	116	11.5	22.58	5.13729	0.008	0.034	0.017	0.09	0.112	0.018	0.056	0.024	0.359
84287	1	34	3	3	1	1.23	25.6	1	1	756	29.3	61.33	12.3268	0.075	0.034	0.115	0.053	0.112	0.032	0.46	0.255	1.136
84293	1	41	3	3	1	5	22.6	1	1	581	17.1	74.46	7.80285	0.316	0.034	0.356	0.028	0.316	0.103	1.08	0.391	2.624
84294	1	23	3	2	5	1.59	22.4	1	1	166	23.1	44.65	3.71781	0.095	0.034	0.404	0.028	0.112	0.118	0.852	0.265	1.908
84302	1	74	3	3	1	3.43	25.5	1	1	540	24.8	77.1	7.00389	0.145	0.034	0.18	0.079	0.112	0.075	0.644	0.252	1.521
84315	1	60	2	4	1	5	33.4	1	1	652	28.1	90.69	7.18933	0.008	0.034	0.017	0.028	0.112	0.018	0.303	0.165	0.685
84322	1	40	4	2	5	2.4558	28.8	1	1	309	20.1	37.36	8.27088	0.299	0.034	0.706	23.6	0.4074	0.191	1.39	0.44	27.0674
84324	1	59	3	2	3	0.94	27.3	1	2	429	25.6	55.28	7.76049	0.259	0.034	0.385	1.39	0.112	0.167	0.823	0.326	3.496
84353	1	54	5	4	1	1.23	28.7	1	1	366	22.1	51.77	7.06973	0.048	0.034	0.066	0.154	0.112	0.018	0.19	0.065	0.687
84354	1	80	3	4	1	1.26	21.8	2	2	483	20.1	97.53	4.95232	0.008	0.034	0.017	0.194	0.112	0.018	0.036	0.048	0.467
84360	1	55	4	4	1	5	32.9	1	1	198	32.3	30.45	6.50246	0.008	0.034	0.017	0.028	0.112	0.018	0.051	0.024	0.292
84368	1	42	4	5	1	2.08	29.1	2	2	393	37.3	34.73	11.3159	0.008	0.034	0.017	0.057	0.112	0.018	0.066	0.024	0.336
84375	1	60	1	1	1	0.41	26.7	2	1	778	43.8	160.9	4.8353	0.008	0.034	0.017	0.028	0.112	0.018	0.065	0.043	0.325
84376	1	55	1	4	5	2.55	33	2	1	828	44.5	92.01	8.99902	0.008	0.034	0.061	0.028	0.112	0.018	0.074	0.042	0.377
84377	1	70	4	3	1	2.4558	24.4	1	1	383	21.5	31.71	12.0782	0.008	0.034	0.017	0.391	0.112	0.018	0.104	0.083	0.767
84380	1	35	3	4	1	0.38	41.6	1	1	207	26.4	14.08	14.7017	0.109	0.034	0.163	0.028	0.4074	0.066	0.448	0.166	1.4214
84381	1	80	4	2	2	1.87	18	2	2	438	15.7	133.4	3.28336	0.008	0.034	0.017	0.028	0.112	0.018	0.04	0.024	0.281
84388	1	65	2	2	1	2.51	24.6	1	1	247	10.2	49.4	5	0.008	0.034	0.046	0.043	0.112	0.018	0.05	0.07	0.381
84390	1	33	2	3	6	0.94	21.8	2	1	319	16.3	38.18	8.35516	0.008	0.034	0.033	0.175	0.112	0.018	0.045	0.024	0.449
84398	1	38	3	3	3	2.61	27.2	1	1	303	25.8	27.09	11.1849	0.328	0.034	0.425	0.028	0.112	0.183	1.19	0.461	2.761
84403	1	61	3	5	1	5	25.6	2	1	386	24.1	44.39	8.69565	0.008	0.034	0.017	0.206	0.112	0.018	0.049	0.024	0.468
84405	1	33	5	5	1	0	23.3	2	1	352	12.6	31.13	11.3074	0.008	0.034	0.017	0.055	0.112	0.018	0.04	0.024	0.308
84411	1	23	3	4	5	2.4558	22.3	1	1	256	13.2	22.88	11.1888	0.032	0.618	0.083	0.028	0.112	0.018	0.239	0.14	1.27
84413	1	41	5	5	1	5	25.2	2	2	434	41.1	33.04	13.1356	0.008	0.034	0.032	0.028	0.112	0.018	0.055	0.053	0.34
84420	1	27	4	4	1	1.67	33.7	1	1	330	25.6	23.63	13.9653	0.119	0.034	0.1012	52.7	0.112	0.08	0.514	0.387	54.0472
84423	1	59	3	4	3	0.49	26.9	1	1	285	37.2	50.81	5.60913	0.074	0.034	0.144	0.041	0.112	0.018	0.38	0.145	0.948
84424	1	69	3	5	3	2.12	33.5	2	1	278	24.7	28.28	9.83027	0.008	0.034	0.036	0.057	0.112	0.018	0.035	0.024	0.324
84431	1	46	1	2	1	2.64	25.2	1	1	406	22.3	35.54	11.4237	0.008	0.034	0.08	0.072	0.112	0.018	0.093	0.024	0.441
84434	1	31	3	5	5	2.4558	25.4	1	2	559	18.3	67.19	8.31969	0.008	0.034	0.017	0.028	0.112	0.018	0.054	0.024	0.295
84464	1	69	4	5	3	3.54	29.4	2	2	550	34.9	61.02	9.01344	0.008	0.034	0.017	0.028	0.112	0.018	0.109	0.044	0.37
84467	1	28	5	5	1	2.4558	27.6	2	1	309	21.6	16.73	18.4698	0.008	0.075	0.017	0.084	0.112	0.018	0.039	0.024	0.377
84470	1	23	5	5	5	0.68	25.3	2	1	312	15.4	18.15	17.1901	0.008	0.034	0.017	0.028	0.112	0.018	0.08	0.024	0.321
84475	1	25	3	3	1	1.49	27.4	1	1	404	34.6	23.82	16.9605	0.092	0.034	0.118	0.073	0.112	0.018	0.339	0.123	0.909
84481	1	72	1	2	1	0.98	29.6	1	1	427	23.6	50.5	8.45545	0.008	0.034	0.017	1.82	0.112	0.018	0.053	0.121	2.183
84488	1	54	3	3	5	1.7	25.4	2	1	515	24.8	43.89	11.7339	0.008	0.034	0.017	0.489	0.112	0.018	0.047	0.024	0.749
84492	1	37	4	4	1	2.03	30.1	2	2	399	18.8	18.27	21.8391	0.008	0.034	0.017	0.051	0.112	0.053	0.154	0.113	0.542
84503	1	55	5	4	1	5	34.1	1	1	321	21.3	69.55	4.61538	0.14	0.034	0.173	0.028	0.112	0.065	0.497	0.277	1.326
84514	1	41	1	1	1	0.61	34.1	2	2	399	25.4	29.44	13.553	0.008	0.034	0.017	3.07	0.112	0.018	0.066	0.085	3.41
84564	1	74	2	1	1	0.07	32.5	2	1	386	28.2	44.98	8.58159	0.008	0.034	0.017	0.119	0.112	0.018	0.064	0.024	0.396
84567	1	65	3	4	1	0.53	34.1	1	1	247	32.5	40.99	6.02586	0.141	0.088	0.213	0.073	0.112	0.081	0.456	0.167	1.331
84568	1	72	3	5	1	5	27.9	1	1	398	22.2	50.42	7.89369	0.008	0.034	0.017	0.028	0.112	0.018	0.041	0.057	0.315
84575	1	61	4	5	1	2.4558	38.8	1	1	103	19	27.96	3.68383	0.106	0.034	0.155	0.028	0.112	0.048	0.576	0.289	1.348
84592	1	58	5	1	3	1.34	21.5	2	2	370	19	79.67	4.64416	0.008	0.034	0.017	0.028	0.112	0.018	0.026	0.024	0.267
84595	1	80	3	5	2	5	24	1	1	516	26.1	115.7	4.45981	0.008	0.034	0.017	0.158	0.112	0.018	0.026	0.024	0.397
84596	1	26	2	2	6	1.49	28.4	2	1	462	33.7	25.95	17.8035	0.008	0.034	0.11	0.12	0.112	0.018	0.179	0.145	0.726
84606	1	63	3	3	3	0.76	34	1	1	680	28	89.09	7.63273	0.008	0.034	0.017	0.861	0.112	0.018	0.078	0.024	1.152
84610	1	54	3	4	1	5	30	1	2	242	16.2	34.59	6.99624	0.008	0.034	0.017	0.028	0.112	0.018	0.035	0.1	0.352
84612	1	48	5	3	1	2.4558	31.2	1	2	357	19.8	34.47	10.3568	0.027	0.034	0.064	0.849	0.112	0.018	0.155	0.067	1.326
84615	1	54	4	2	1	2.61	27.3	1	1	384	24.4	44.76	8.57909	0.119	0.034	0.183	0.211	0.112	0.098	0.584	8.15	9.491
84623	1	53	4	4	1	0.9	26.1	1	1	305	16.2	42.58	7.16299	0.008	0.034	0.017	1.28	0.112	0.018	0.105	0.024	1.598
84627	1	80	1	1	1	0.63	29.1	1	2	5.87	2.114	99.61	0.0589298	0.008	0.034	0.017	0.028	0.112	0.018	0.026	0.024	0.267
84631	1	57	4	3	5	1.19	35.9	2	2	240	15.7	32.41	7.40512	0.008	0.034	0.048	0.107	0.112	0.018	0.114	0.034	0.475
84652	1	59	4	5	5	5	28	1	1	447	21.6	51.77	8.63434	0.187	0.034	0.242	0.028	0.112	0.078	0.722	0.275	1.678
84661	1	41	2	3	1	1.27	27.6	1	1	509	22.6	32.81	15.5136	0.102	0.034	0.179	1.04	0.4074	0.054	0.536	0.19	2.5424
84673	1	29	2	4	5	2.4558	21.4	1	1	494	18.6	28.54	17.309	0.045	0.034	0.094	0.028	0.112	0.038	0.24	0.099	0.69
84686	1	23	1	3	5	2.4558	20.8	2	1	673	32	51.37	13.101	0.008	0.034	0.017	0.107	0.112	0.018	0.033	0.024	0.353
84695	1	80	1	1	4	0.93	38.8	2	1	404	22	40.78	9.90682	0.008	0.034	0.017	0.051	0.112	0.018	0.052	0.024	0.316
84702	1	47	2	4	1	3.48	22.5	1	1	591	36	36.9	16.0163	0.008	0.034	0.017	0.214	0.112	0.018	0.018	0.024	0.445
84703	1	75	5	3	1	1.25	34.3	1	1	306	13.8	78.27	3.90954	0.008	0.034	0.017	0.511	0.112	0.018	0.094	0.024	0.818
84712	1	34	4	2	5	0.31	25.9	1	1	448	34.1	28.25	15.8584	0.407	0.034	0.871	8.17	3.13	0.177	1.48	0.425	14.694
84717	1	50	4	2	3	0	22.9	1	1	954	39.2	79.96	11.931	0.182	0.034	0.449	0.028	0.112	0.156	1.04	0.312	2.313
84727	1	80	3	2	1	0.03	30.9	1	2	363	23.4	73.05	4.9692	0.008	0.034	0.035	0.028	0.112	0.018	0.072	0.047	0.354
84732	1	80	3	2	1	1.79	25.2	2	1	242	19.3	32.37	7.47606	0.008	0.034	0.033	0.028	0.112	0.018	0.155	0.099	0.487
84735	1	59	3	4	3	1.87	24.2	1	1	449	23.1	90.88	4.94058	0.317	0.034	0.672	0.028	0.112	0.188	0.296	0.591	2.238
84738	1	45	3	3	1	3.7	26	2	1	575	19.6	32.12	17.9016	0.008	0.034	0.12	0.028	0.112	0.018	0.203	0.147	0.67
84752	1	62	3	3	1	2.36	31.9	1	2	431	28.2	39.18	11.0005	0.077	0.034	0.12	0.388	0.112	0.04	0.375	0.169	1.315
84753	1	33	3	1	1	1.76	31.1	1	1	727	20.9	89.78	8.09757	0.094	0.034	0.291	0.051	0.112	0.119	0.649	0.28	1.63
84754	1	70	3	2	1	0.62	28	1	1	234	21.4	24.45	9.57055	0.008	0.034	0.017	0.028	0.112	0.018	0.043	0.024	0.284
84771	1	31	5	5	1	3.24	25.5	2	1	443	12.8	44.98	9.84882	0.008	0.034	0.054	0.028	0.112	0.018	0.077	0.037	0.368
84776	1	47	4	4	1	1.48	23.4	1	1	441	17	70.5	6.25532	0.136	0.034	0.201	0.028	0.112	0.018	0.593	0.223	1.345
84785	1	66	3	4	6	2.55	28.2	1	1	340	25	39.66	8.57287	0.104	0.034	0.159	0.028	0.112	0.057	0.353	0.196	1.043
84788	1	71	3	2	6	1.19	31.7	1	1	334	51.4	29.24	11.4227	0.272	0.034	0.553	0.438	0.112	0.157	1.05	0.366	2.982
84790	1	41	1	1	1	0.8	22.9	1	1	648	16.7	85.82	7.55069	0.014	0.034	0.028	0.028	0.112	0.018	0.144	0.105	0.483
84791	1	20	4	4	5	3.52	22	2	1	539	29.8	31.99	16.849	0.008	0.034	0.017	0.077	0.112	0.018	0.036	0.024	0.326
84793	1	28	3	4	6	2.38	25.6	2	1	456	23.4	23.64	19.2893	0.008	0.034	0.017	0.028	0.112	0.018	0.033	0.024	0.274
84803	1	44	3	4	1	1.58	21.7	1	1	390	19.3	34.94	11.162	0.163	0.034	0.241	0.13	0.4074	0.092	0.657	0.376	2.1004
84808	1	45	5	5	1	5	22.2	1	1	818	31.1	67.05	12.1999	0.008	0.034	0.017	0.028	0.112	0.018	0.07	0.037	0.324
84813	1	31	3	3	6	1.85	28.7	1	2	274	13.9	35.83	7.64722	0.136	0.034	0.148	0.028	0.112	0.072	0.43	0.187	1.147
84817	1	75	1	5	2	5	26.5	1	1	248	12.9	49.28	5.03247	0.008	0.034	0.053	0.062	0.112	0.018	0.04	0.052	0.379
84831	1	54	1	1	4	1.18	30.1	1	2	380	45.5	19.25	19.7403	0.02	0.1	0.079	0.193	0.112	0.018	0.513	0.265	1.3
84832	1	58	3	5	5	2.97	23	2	2	522	28.3	54.88	9.51166	0.008	0.034	0.017	0.028	0.112	0.018	0.063	0.037	0.317
84835	1	39	4	2	6	2.06	27.4	1	1	391	24.6	39.55	9.88622	0.081	0.034	0.132	0.156	0.112	0.044	0.365	0.179	1.103
84842	1	50	1	3	1	1.02	31	1	1	358	25.1	39.09	9.15835	0.008	0.034	0.017	76.4	0.112	0.018	0.176	0.024	76.789
84843	1	24	5	5	5	1.26	25.9	2	2	475	12.6	29.01	16.3737	0.008	0.034	0.03	0.028	0.112	0.018	0.054	0.045	0.329
84865	1	26	3	4	6	1.32	40.4	2	2	231	21.8	22.82	10.1227	0.008	0.034	0.017	0.028	0.112	0.018	0.096	0.069	0.382
84866	1	33	1	2	6	2.36	27	2	1	490	20.7	54.5	8.99083	0.008	0.034	0.036	0.028	0.112	0.018	0.061	0.065	0.362
84878	1	46	2	1	6	1.48	29.3	2	2	460	30.6	49.27	9.33631	0.008	0.034	0.017	0.285	0.112	0.018	0.06	0.411	0.945
84906	1	53	3	4	3	1.56	26	1	1	339	22.6	34.44	9.84321	0.197	0.034	0.332	0.028	0.112	0.124	2.42	0.389	3.636
84916	1	38	4	2	1	0.55	20.7	2	2	855	46.3	64.92	13.1701	0.008	0.034	0.017	0.829	0.112	0.018	0.065	0.036	1.119
84917	1	32	1	2	5	0.67	32.4	1	1	491	42.3	29.1	16.8729	0.13	0.034	0.154	0.028	0.112	0.084	0.363	0.122	1.027
84919	1	61	1	1	5	1.11	21.6	2	2	462	13.8	71.79	6.43544	0.008	0.034	0.017	0.966	0.112	0.018	0.068	0.036	1.259
84920	1	35	4	2	1	0.77	26.4	2	1	527	39.2	35.67	14.7743	0.026	0.034	0.268	0.028	0.112	0.041	0.504	0.278	1.291
84921	1	54	4	1	1	0.95	21.2	2	2	556	24.3	68.97	8.06148	0.008	0.034	0.017	0.134	0.112	0.018	0.026	0.037	0.386
84926	1	40	3	3	6	1.15	37.7	1	1	151	21.4	29.88	5.05355	0.098	0.034	0.163	0.028	0.112	0.038	0.363	0.193	1.029
84930	1	49	4	3	3	2.53	22.2	1	1	702	29.9	78.63	8.92789	0.317	0.034	0.581	0.028	0.112	0.222	1.38	0.703	3.377
84931	1	30	4	3	5	4.12	35.7	2	1	537	38	46.05	11.6612	0.008	0.034	0.017	9.31	0.112	0.018	0.055	0.041	9.595
84934	1	57	1	1	1	4.57	43.7	1	1	105	16.2	21.91	4.79233	0.008	0.034	0.017	0.185	0.112	0.018	0.031	0.024	0.429
84935	1	26	3	3	5	5	29.4	1	1	721	39.5	44.62	16.1587	0.008	0.034	0.017	0.028	0.112	0.018	0.065	0.048	0.33
84950	1	48	5	5	1	5	29.1	2	2	436	26.8	34.66	12.5793	0.008	0.034	0.017	0.122	0.112	0.018	0.032	0.024	0.367
84967	1	76	3	4	1	3.45	33.3	1	1	411	23.7	52.65	7.80627	0.008	0.204	0.017	0.028	0.112	0.018	0.055	0.024	0.466
84969	1	60	4	5	2	5	40.4	1	2	422	44.7	38.97	10.8288	0.008	0.034	0.017	0.127	0.4074	0.018	0.039	0.024	0.6744
84970	1	51	2	1	5	0.02	34.3	1	1	471	32.9	46.42	10.1465	0.089	0.034	0.163	0.105	0.112	0.058	0.385	0.156	1.102
84976	1	31	3	2	1	0.92	30.5	1	2	356	22	19.75	18.0253	0.064	0.116	0.119	0.157	0.112	0.036	0.3	0.143	1.047
84980	1	54	1	4	3	0.29	33.6	1	1	309	20.5	47.39	6.52036	0.082	0.034	0.134	0.028	8.18	0.038	0.223	0.134	8.853
85007	1	47	3	4	3	1.44	26.8	1	1	454	21.1	26.84	16.9151	0.232	0.034	0.33	0.028	0.112	0.12	0.83	0.325	2.011
85042	1	23	1	1	6	1.19	25.1	1	1	543	24.7	28.98	18.7371	0.008	0.034	0.017	0.028	0.112	0.018	0.085	0.057	0.359
85043	1	26	4	4	1	0.43	29.8	1	1	477	29.7	19.2	24.8438	0.025	0.034	0.069	0.322	0.112	0.018	0.184	0.106	0.87
85052	1	34	4	3	5	1.5	34.4	1	2	426	34	38.49	11.0678	0.12	0.034	0.381	0.028	0.112	0.12	0.296	0.474	1.565
85053	1	58	5	2	1	1.03	24.8	1	2	315	18.9	45.77	6.88224	0.008	0.034	0.017	0.028	0.112	0.018	0.038	0.039	0.294
85054	1	62	3	4	1	2.4558	26.5	1	1	440	39.4	66.77	6.58979	0.112	0.034	0.129	0.069	0.112	0.057	0.459	0.19	1.162
85057	1	67	3	4	1	4.23	27	2	1	448	21.5	38.4	11.6667	0.008	0.034	0.03	0.028	0.112	0.018	0.061	0.061	0.352
85061	1	70	5	3	1	0.83	24.3	2	2	456	27	66.9	6.81614	0.008	0.034	0.017	0.602	0.112	0.018	0.045	0.024	0.86
85066	1	49	2	2	1	4.23	33.5	2	1	267	18	40.11	6.65669	0.008	0.034	0.017	0.077	0.112	0.018	0.041	0.024	0.331
85067	1	80	3	4	1	3.77	29.8	1	1	393	19.6	68.45	5.74142	0.008	0.057	0.042	0.028	0.112	0.018	0.274	0.189	0.728
85087	1	21	2	4	6	4.94	19.8	2	2	731	35.9	20.41	35.8158	0.008	0.034	0.017	0.028	0.112	0.018	0.057	0.024	0.298
85101	1	63	1	3	2	1.88	24.2	1	1	322	15.1	59.15	5.44379	0.021	0.034	0.069	0.028	0.112	0.018	0.126	0.043	0.451
85103	1	51	1	5	1	4.74	45.6	1	1	436	41.9	48.79	8.93626	0.008	0.034	0.017	0.353	0.112	0.018	0.037	0.024	0.603
85107	1	24	2	2	5	0.59	25.1	1	1	411	26.3	21.72	18.9227	0.104	0.075	0.143	0.044	0.112	0.067	0.341	0.133	1.019
85109	1	65	3	5	1	2.4558	27.8	2	1	473	35	50.29	9.40545	0.008	0.057	0.017	0.078	0.112	0.018	0.039	0.024	0.353
85113	1	21	4	3	5	1.58	27.3	1	1	486	23.8	39.82	12.2049	0.067	0.034	0.14	0.258	0.112	0.048	0.379	0.276	1.314
85117	1	37	3	5	4	1.78	33.8	1	1	435	17.7	29.04	14.9793	0.116	0.034	0.151	0.028	0.112	0.067	0.478	0.166	1.152
85119	1	78	5	5	1	1.69	21.1	2	2	314	13.4	43.61	7.20018	0.008	0.034	0.027	0.028	0.112	0.018	0.095	0.069	0.391
85120	1	65	3	2	1	2.4558	28.5	1	1	674	31.3	63.88	10.551	0.008	0.053	0.03	0.073	0.112	0.018	0.079	0.04	0.413
85127	1	35	4	3	1	1.29	23	1	2	472	21.8	58.09	8.12532	0.223	0.034	0.199	0.07	0.112	0.073	0.419	0.156	1.286
85128	1	65	3	5	1	5	22.2	2	1	412	23.3	52.92	7.78534	0.008	0.034	0.017	0.028	0.112	0.018	0.051	0.043	0.311
85137	1	61	1	1	1	3.45	37.8	2	2	360	18.9	49.79	7.23037	0.008	0.034	0.052	0.087	0.112	0.018	0.056	0.024	0.391
85142	1	71	1	1	1	1.24	21.9	1	1	342	19.8	64.27	5.3213	0.112	0.034	0.182	0.028	0.112	0.07	0.587	0.205	1.33
85148	1	45	1	3	6	1.23	41.5	1	1	168	19.2	33.95	4.94845	0.017	0.034	0.066	0.228	0.112	0.018	0.362	0.245	1.082
85157	1	53	3	3	3	0	29.1	1	1	179	24.3	27.83	6.43191	0.407	0.034	0.629	0.053	0.112	0.244	1.32	0.477	3.276
85163	1	29	1	4	6	0.42	30.2	1	1	641	45.1	27.73	23.1158	0.008	0.034	0.07	0.028	0.112	0.018	0.097	0.065	0.432
85169	1	54	5	2	1	1.38	27.7	1	1	243	16.7	37.82	6.42517	0.008	0.034	0.017	0.028	0.112	0.018	0.036	0.034	0.287
85181	1	48	1	3	3	2.55	27.3	2	1	476	18.6	27.94	17.0365	0.008	0.034	0.024	0.08	0.112	0.018	0.026	0.024	0.326
85198	1	55	1	3	1	2.47	42.6	2	2	348	27.5	28.19	12.3448	0.008	0.034	0.024	0.028	0.112	0.018	0.113	0.084	0.421
85202	1	34	2	4	1	0.84	28.8	1	1	214	18.6	19.8	10.8081	0.008	0.034	0.034	0.028	0.112	0.018	0.163	0.091	0.488
85211	1	42	5	5	1	4.53	21.5	2	2	323	24.2	25.41	12.7115	0.008	0.034	0.017	0.066	0.112	0.018	0.058	0.061	0.374
85214	1	26	4	4	5	3.22	22.8	1	1	693	30.3	69.94	9.90849	0.008	0.034	0.025	4.22	0.112	0.018	0.14	0.18	4.737
85217	1	31	5	3	1	2.47	30.6	1	1	522	38.1	43.49	12.0028	0.057	0.034	0.092	0.028	0.112	0.032	0.274	0.117	0.746
85234	1	32	2	4	6	1.26	32.2	1	1	386	32	12.91	29.8993	0.017	0.034	0.047	0.165	0.112	0.018	0.073	0.039	0.505
85253	1	57	2	4	1	2.24	24.2	2	1	316	12.7	28.68	11.0181	0.008	0.034	0.047	0.028	0.112	0.018	0.041	0.024	0.312
85257	1	59	3	3	1	3	36.8	1	1	976	48.6	49.96	19.5356	0.158	0.034	0.166	0.075	0.112	0.067	0.559	0.235	1.406
85259	1	38	3	3	3	1.24	25	1	1	599	26.8	39.58	15.1339	0.2	0.034	0.424	0.028	0.112	0.139	0.971	0.331	2.239
85261	1	62	4	3	6	2.4558	31.7	2	1	617	60.6	14.83	41.6049	0.008	0.034	0.017	0.095	0.112	0.018	0.166	0.119	0.569
85263	1	46	3	4	1	1.76	31	1	1	210	23.6	29.42	7.138	0.008	0.21	0.017	0.415	0.112	0.018	2.54	0.319	3.639
85266	1	70	2	4	1	4.44	48	2	2	293	39.3	89.59	3.27045	0.008	0.034	0.017	0.028	0.112	0.018	0.04	0.024	0.281
85270	1	52	3	5	1	5	22.2	2	1	492	21.5	57.96	8.48861	0.008	0.034	0.017	0.055	0.112	0.018	0.075	0.722	1.041
85278	1	78	3	5	1	3.14	35.6	1	1	210	25.3	38.42	5.4659	0.008	0.034	0.032	0.046	0.112	0.018	0.045	0.04	0.335
85279	1	50	5	2	1	0.69	30.9	1	2	373	12.9	44.8	8.32589	0.136	0.034	0.237	0.097	0.112	0.096	0.564	0.185	1.461
85281	1	35	3	3	1	5	32.7	1	1	256	35.7	30.09	8.50781	0.176	0.393	0.2	0.028	0.112	0.069	1.29	0.331	2.599
85285	1	80	4	1	2	2.4558	20.8	1	1	5.41	2.114	105.2	0.0514259	0.008	0.034	0.1012	3.23	0.4074	0.018	0.033	0.024	3.8556
85291	1	48	4	4	6	4.12	33.2	1	1	235	15.3	31.83	7.38297	0.062	0.034	0.105	7.6	0.112	0.035	0.24	0.119	8.307
85296	1	78	3	2	1	1.15	27.5	1	1	453	20.8	132.4	3.42145	0.141	0.034	0.198	1.92	0.112	0.075	0.528	0.226	3.234
85298	1	79	3	1	1	1.22	21.5	2	2	1290	36.6	179.2	7.19866	0.008	0.034	0.017	0.028	0.112	0.018	0.036	0.024	0.277
85315	1	32	2	3	6	1.85	28.1	2	1	620	16.2	49.75	12.4623	0.008	0.034	0.017	23.5	0.112	0.018	0.215	0.056	23.96
85334	1	49	3	5	1	3.17	22.4	2	1	326	24.7	66.55	4.89857	0.008	0.034	0.061	0.152	0.112	0.018	0.105	0.065	0.555
85335	1	79	3	2	1	1.66	29.4	1	1	256	26.2	46.69	5.48297	0.091	0.034	0.188	0.028	0.112	0.05	0.399	0.165	1.067
85339	1	45	5	5	1	5	26.8	2	1	245	20.2	25.1	9.76096	0.008	0.034	0.017	0.167	0.112	0.018	0.036	0.024	0.416
85348	1	59	1	2	1	1.47	29	1	1	465	14.8	68.04	6.83422	0.008	0.786	0.069	2.17	0.112	0.018	1.18	0.92	5.263
85355	1	22	3	4	5	5	25.5	2	1	436	24.9	34.54	12.623	0.008	0.034	0.017	6.58	0.112	0.018	0.058	0.024	6.851
85356	1	43	4	4	1	5	29.5	2	1	163	17.9	20.11	8.10542	0.008	0.034	0.017	0.17	0.112	0.018	0.072	0.05	0.481
85366	1	32	2	3	1	0.39	36.6	1	1	369	16.4	12.21	30.2211	0.069	0.034	0.117	0.028	0.112	0.042	0.326	0.132	0.86
85369	1	31	3	5	1	2.81	33.7	2	1	545	30.2	37.03	14.7178	0.008	0.034	0.017	0.093	0.112	0.018	0.042	0.037	0.361
85374	1	43	1	2	1	1.13	45.6	2	2	576	33.7	60.87	9.46279	0.008	0.034	0.017	0.028	0.112	0.018	0.064	0.042	0.323
85381	1	22	5	3	5	3.57	22	2	2	524	24.3	30.16	17.374	0.008	0.034	0.017	0.028	0.112	0.018	0.033	0.024	0.274
85394	1	34	5	3	1	2.09	35.2	1	1	346	31.6	24.63	14.0479	0.196	0.034	0.505	0.028	0.112	0.11	1.03	0.402	2.417
85400	1	27	3	5	5	2.4558	24.1	1	1	451	16.4	25.86	17.4401	0.008	0.034	0.017	0.028	0.112	0.018	0.048	0.024	0.289
85406	1	71	1	3	1	1.58	27.2	1	1	459	21.2	66.54	6.89811	0.123	0.034	0.167	0.092	0.112	0.063	0.417	0.28	1.288
85409	1	31	2	4	5	2.64	39.6	2	1	320	30.6	20.81	15.3772	0.008	0.034	0.042	0.028	0.112	0.018	0.046	0.024	0.312
85424	1	75	3	3	3	0.89	26.3	1	2	507	23.6	102.1	4.96572	0.109	0.034	0.147	0.248	0.112	0.063	0.439	0.203	1.355
85450	1	74	3	5	3	1.77	22.6	1	1	516	25	57.14	9.03045	0.008	0.034	0.017	0.028	0.112	0.018	0.076	0.105	0.398
85456	1	68	3	3	3	1.44	25.5	1	1	530	35.2	55.36	9.5737	0.266	0.034	0.593	0.042	0.112	0.116	1.16	0.331	2.654
85464	1	67	1	1	1	2.4558	23.8	2	1	257	18.1	35.06	7.33029	0.008	0.034	0.1012	0.604	0.112	0.018	0.521	0.091	1.4892
85467	1	67	3	3	2	0.75	31	1	2	522	18.8	67.75	7.7048	0.238	0.034	0.269	0.302	0.112	0.163	0.667	0.267	2.052
85471	1	63	5	2	1	0.96	21.7	1	1	399	23.6	42.49	9.39044	0.099	0.034	0.104	0.028	0.112	0.038	0.296	0.102	0.813
85472	1	68	5	2	1	1.03	23	1	1	251	17.2	40.89	6.13842	0.008	0.034	0.017	0.028	0.112	0.018	0.057	0.059	0.333
85484	1	29	1	1	1	1.35	27.7	1	1	227	14.2	18.06	12.5692	0.008	0.034	0.017	0.028	0.112	0.018	0.134	0.304	0.655
85487	1	34	4	3	1	0.91	34.8	1	1	288	36.8	40.49	7.11287	0.077	0.034	0.164	1.1	0.112	0.064	0.374	0.152	2.077
85488	1	23	4	3	5	0.52	24.8	2	2	484	29.7	48.65	9.94861	0.008	0.034	0.049	5.59	0.112	0.018	0.195	0.091	6.097
85491	1	62	3	2	1	1.37	35.9	1	1	269	30.2	36.84	7.30185	0.008	0.124	0.017	3.99	0.112	0.018	0.102	0.06	4.431
85496	1	43	3	4	1	5	30.8	2	1	308	25.9	40.5	7.60494	0.008	0.034	0.044	0.028	0.112	0.018	0.105	0.087	0.436
85523	1	45	3	4	1	5	30.1	1	1	205	15	12.5	16.4	0.008	0.034	0.017	0.028	0.112	0.018	0.043	0.037	0.297
85531	1	37	5	4	1	2.12	45.5	2	1	296	31.9	17.69	16.7326	0.008	0.034	0.017	0.049	0.112	0.018	0.043	0.024	0.305
85536	1	70	1	1	1	0.5	30.5	1	1	195	13.8	18.95	10.2902	0.008	0.034	0.1012	0.712	0.4074	0.018	0.081	0.071	1.4326
85542	1	20	1	2	5	0.78	30.3	2	1	219	15.4	7.47	29.3173	0.008	0.034	0.041	0.028	0.112	0.018	0.05	0.049	0.34
85545	1	74	5	4	3	5	24.1	1	1	516	36.1	54.5	9.46789	0.039	0.034	0.098	0.028	0.112	0.018	0.198	0.095	0.622
85548	1	38	1	1	1	2.4558	37.7	2	1	311	33.7	30.76	10.1105	0.008	0.034	0.017	6.23	0.112	0.018	0.117	0.208	6.744
85557	1	38	1	2	4	1.41	29.7	1	2	305	25.5	29.82	10.228	0.068	0.034	1.78	0.028	0.4074	0.039	2.27	0.544	5.1704
85571	1	61	2	3	1	2.08	37.6	1	1	151	18	21.64	6.97782	0.008	0.216	0.026	0.078	0.112	0.018	0.113	0.074	0.645
85573	1	33	3	5	6	4.22	35.5	1	1	369	29	27.38	13.477	0.008	0.034	0.029	0.028	0.112	0.018	0.11	0.081	0.42
85576	1	73	3	4	1	2.62	29.7	1	1	304	33.9	49.49	6.14266	0.008	0.034	0.017	0.054	0.112	0.018	0.158	0.024	0.425
85577	1	50	1	3	1	0.95	28	1	1	529	33.9	61.88	8.5488	0.008	0.034	0.027	0.028	0.112	0.018	0.207	0.498	0.932
85584	1	47	3	4	1	5	35.6	2	1	564	44.6	53.65	10.5126	0.008	0.034	0.017	0.028	0.112	0.018	0.099	0.04	0.356
85588	1	25	5	5	5	2.95	19.4	2	1	525	20.9	29.6	17.7365	0.008	0.034	0.017	0.028	0.112	0.018	0.018	0.036	0.271
85594	1	74	3	5	1	5	31	1	1	527	14	65.31	8.06921	0.008	0.034	0.017	0.028	0.112	0.018	0.154	0.091	0.462
85597	1	71	1	1	3	0.42	24.9	1	1	739	30	64.96	11.3762	0.008	0.034	0.05	0.028	0.112	0.018	0.044	0.054	0.348
85598	1	63	4	2	5	2.79	23.5	1	1	438	37.2	53.19	8.23463	0.029	0.034	0.052	0.028	0.112	0.018	0.143	0.059	0.475
85603	1	33	4	5	1	0.74	24.1	2	2	578	20.1	46.1	12.538	0.008	0.034	0.017	0.071	0.112	0.018	0.026	0.024	0.31
85604	1	30	3	3	1	0.25	31.1	1	1	356	21.2	28.16	12.642	0.153	0.034	0.182	0.053	0.112	0.083	0.567	0.243	1.427
85625	1	80	3	5	1	5	26.5	2	1	346	16.5	56.74	6.09799	0.008	0.034	0.017	0.028	0.112	0.018	0.143	0.115	0.475
85626	1	72	2	1	1	0.75	24.3	1	1	525	13.8	62.66	8.37855	0.008	0.034	0.017	0.251	0.112	0.018	0.034	0.024	0.498
85632	1	80	3	4	1	4.06	26.7	1	1	168	10.8	70.14	2.39521	0.008	0.034	0.017	0.028	0.112	0.018	0.076	0.024	0.317
85635	1	57	2	5	1	2.87	27.3	1	1	367	34.3	38.13	9.62497	0.051	0.034	0.08	0.067	0.112	0.027	0.21	0.076	0.657
85642	1	31	4	5	5	4.55	24.2	1	2	1270	32	54.09	23.4794	0.134	0.034	0.217	0.905	0.112	0.08	0.608	0.316	2.406
85651	1	33	4	3	1	1.41	28.8	2	1	419	27.7	35.71	11.7334	0.008	0.034	0.017	5.85	0.112	0.018	0.047	0.035	6.121
85663	1	62	2	4	4	0.35	18.9	1	1	887	27.3	168.3	5.27035	0.095	0.034	0.257	0.475	0.112	0.033	0.55	0.191	1.747
85667	1	38	1	3	3	2.59	33.4	2	1	167	15.7	10.77	15.506	0.008	0.034	0.017	4.62	0.112	0.018	0.084	0.113	5.006
85670	1	45	4	3	1	2.5	38	1	1	165	27.8	13.69	12.0526	0.008	0.034	0.017	0.028	0.112	0.018	0.042	0.024	0.283
85675	1	22	3	4	5	1.02	26.1	2	1	588	24.1	34.98	16.8096	0.008	0.477	0.025	0.051	0.112	0.018	0.088	0.207	0.986
85678	1	30	3	4	5	5	50.7	1	1	316	42	19.94	15.8475	0.008	0.034	0.053	0.028	0.112	0.018	0.2	0.068	0.521
85679	1	80	3	5	1	3.25	28.4	2	1	675	28.5	84.25	8.01187	0.008	0.034	0.017	0.028	0.112	0.018	0.032	0.024	0.273
85681	1	65	2	4	1	1.09	29.1	2	1	530	28.1	42.02	12.613	0.008	0.084	0.049	0.158	0.112	0.018	0.101	0.076	0.606
85682	1	32	5	2	4	2.35	36.6	1	1	246	13.8	29.84	8.24397	0.058	0.034	0.111	0.068	0.112	0.046	0.294	0.265	0.988
85684	1	61	2	5	3	2.4558	33	1	1	518	22.4	34.86	14.8594	0.079	0.034	0.102	0.047	0.112	0.041	0.268	0.128	0.811
85685	1	67	1	4	1	4.27	24.6	1	1	321	22.9	22.56	14.2287	0.008	0.034	0.017	0.028	0.112	0.018	0.045	0.024	0.286
85691	1	66	5	4	1	3.77	24.5	2	2	319	20.1	48.61	6.56244	0.008	0.034	0.017	0.058	0.112	0.018	0.025	0.024	0.296
85710	1	33	3	4	2	2.4558	32.9	1	2	944	53.2	24.95	37.8357	1.45	0.034	1.45	0.057	0.112	0.605	3.44	0.82	7.968
85715	1	66	3	3	2	1.05	38.1	2	1	541	60.8	101.5	5.33005	0.008	0.034	0.017	0.028	0.112	0.018	0.074	0.046	0.337
85718	1	64	1	3	3	2.38	23.5	1	1	767	25.2	109.2	7.02381	0.078	0.034	0.111	0.028	0.112	0.036	0.278	0.134	0.811
85724	1	80	3	5	1	2.4558	25.2	2	1	495	31.7	79.22	6.24842	0.008	0.034	0.017	0.307	0.112	0.018	0.018	0.024	0.538
85726	1	60	3	3	6	1.49	45.7	1	1	202	37.6	48.28	4.18393	0.008	0.034	0.017	0.028	0.112	0.018	0.096	0.024	0.337
85727	1	30	1	4	6	1.23	31.4	2	1	369	19.4	15.89	23.2222	0.008	0.034	0.017	0.051	0.112	0.018	0.018	0.024	0.282
85730	1	78	3	3	1	1.88	26.4	1	1	364	27.4	65.75	5.53612	0.008	0.034	0.017	0.028	0.112	0.018	0.114	0.128	0.459
85731	1	44	2	1	6	2.4558	37.9	1	1	172	12.7	37.51	4.58544	0.008	0.034	0.017	10.7	0.112	0.018	0.102	0.195	11.186
85740	1	76	3	1	2	1.38	25.8	1	1	398	20.7	48.96	8.12908	0.008	0.034	0.045	0.045	0.112	0.018	0.235	0.117	0.614
85753	1	42	5	2	1	1.03	26.7	1	1	272	13.6	31.35	8.67624	0.008	0.034	0.024	0.028	0.112	0.018	0.166	0.093	0.483
85760	1	58	3	3	1	3.14	29.9	1	1	469	36.8	19.36	24.2252	0.008	0.084	0.041	0.028	0.112	0.018	0.101	0.036	0.428
85772	1	53	4	3	6	0.05	28.9	1	1	327	20.6	48.11	6.79692	0.149	0.034	0.251	0.028	0.112	0.101	0.709	0.261	1.645
85782	1	77	5	1	1	2.4558	30.5	1	1	391	14.7	51.47	7.59666	0.008	0.034	0.017	10.7	0.112	0.018	0.03	0.035	10.954
85790	1	60	4	4	5	0.42	18.5	1	1	528	26.2	100.7	5.2433	0.181	0.034	0.25	0.028	0.112	0.082	0.757	0.267	1.711
85796	1	38	3	4	1	1.53	34.3	2	1	245	29.4	16.91	14.4885	0.008	0.034	0.017	0.028	0.4074	0.018	0.046	0.024	0.5824
85797	1	29	3	5	5	5	24.4	2	1	487	23.9	45.59	10.6822	0.008	0.034	0.031	0.091	0.112	0.018	0.082	0.024	0.4
85799	1	36	1	2	6	0.31	27.8	1	1	493	31.6	33.31	14.8004	0.037	0.034	0.44	0.219	0.112	0.018	0.199	0.074	1.133
85810	1	36	5	3	1	2.46	26.1	1	1	286	24.1	13.13	21.7822	0.008	0.034	0.017	0.064	7.3	0.018	0.143	1.28	8.864
85815	1	52	5	5	5	2.53	24.6	2	1	307	27.2	19.44	15.7922	0.008	0.034	0.017	0.028	0.112	0.018	0.045	0.036	0.298
85836	1	56	3	3	1	4.62	22.1	1	1	979	35	109.1	8.97342	0.016	0.034	0.051	0.028	0.112	0.018	0.188	0.099	0.546
85856	1	47	5	5	1	5	32.3	2	2	424	29.1	48.65	8.71531	0.008	0.034	0.017	0.122	0.112	0.018	0.042	0.024	0.377
85862	1	70	3	5	1	1.25	28.9	2	1	439	21.3	43.92	9.99545	0.008	0.034	0.017	0.028	0.112	0.018	0.077	7.72	8.014
85870	1	66	1	2	1	1.02	28.7	1	1	457	20.9	65	7.03077	0.008	0.034	0.017	7.17	0.112	0.018	0.085	0.1	7.544
85875	1	71	3	5	5	5	34.6	1	2	463	28.8	59.5	7.78151	0.008	0.034	0.017	0.048	0.112	0.018	0.058	0.042	0.337
85896	1	60	3	4	3	0.8	22.3	1	1	782	28	84.37	9.2687	0.189	0.034	0.269	0.028	0.112	0.088	0.756	0.289	1.765
85898	1	47	4	3	4	0.63	36.2	1	1	401	34.2	33.04	12.1368	0.031	0.034	0.128	0.028	0.112	0.018	0.289	0.31	0.95
85900	1	65	2	1	1	1.79	25.1	1	1	407	22.1	49.19	8.27404	0.008	0.064	0.035	0.028	0.112	0.018	0.571	0.113	0.949
85905	1	35	1	2	6	2.69	24.1	1	1	587	33	34.68	16.9262	0.234	0.034	0.313	0.028	0.112	0.105	0.885	0.307	2.018
85918	1	66	5	2	3	3.7	20.3	1	2	593	17.6	60.38	9.82113	0.06	0.034	0.109	0.028	0.112	0.035	0.312	0.203	0.893
85944	1	25	4	4	5	3.52	21.5	1	1	896	53.3	29.23	30.6534	0.013	0.034	0.048	0.028	0.112	0.018	0.139	0.059	0.451
85946	1	49	1	4	3	3.77	32.9	1	1	249	21.8	19.66	12.6653	0.047	0.034	0.056	0.166	0.112	0.018	0.253	0.11	0.796
85947	1	22	2	2	5	2.25	17.9	1	2	770	40.3	39.77	19.3613	0.075	0.034	0.192	0.028	0.112	0.042	0.326	0.111	0.92
85962	1	65	3	5	1	5	22.8	2	1	564	21.2	82.97	6.79764	0.008	0.034	0.017	0.028	0.112	0.018	0.049	0.024	0.29
85967	1	32	3	5	5	1.81	22.9	2	1	602	19.5	38.24	15.7427	0.008	0.034	0.017	0.028	0.112	0.018	0.035	0.024	0.276
85970	1	64	4	5	1	3.16	28.8	2	2	236	16.2	39.56	5.96562	0.008	0.034	0.017	0.028	0.112	0.018	0.112	0.035	0.364
85974	1	59	2	2	5	2.4558	30.4	1	2	288	16.4	34.25	8.40876	0.008	0.034	0.017	7.38	0.112	0.018	0.064	0.045	7.678
85976	1	37	5	4	1	1.72	22.4	1	2	565	25	37.59	15.0306	0.008	0.034	0.017	0.028	0.112	0.018	0.032	0.024	0.273
85981	1	29	2	2	5	2.55	27.6	1	1	534	23.2	26	20.5385	0.019	0.034	0.07	0.028	0.112	0.018	0.136	0.052	0.469
85986	1	77	3	3	1	1.82	36.6	1	1	114	10	43.23	2.63706	0.12	0.034	0.288	0.028	0.112	0.104	0.779	0.277	1.742
85992	1	31	5	4	6	1.03	40.5	2	1	270	25.3	27.29	9.89373	0.008	0.034	0.017	0.028	0.112	0.018	0.036	0.034	0.287
85995	1	42	5	5	1	1.4	25.3	1	1	511	22	35.19	14.5212	0.1	0.034	0.082	0.075	0.112	0.025	0.2	0.092	0.72
85998	1	80	1	9	2	1.41	29.1	9	1	239	35.7	71.06	3.36335	0.008	0.034	0.045	0.069	0.4074	0.018	0.081	0.068	0.7304
86010	1	55	4	2	3	2.78	28.5	1	1	247	21.4	29.16	8.47051	0.017	0.034	0.153	0.046	0.112	0.07	0.29	0.104	0.826
86017	1	70	3	4	1	1.81	40.2	1	1	95.2	17.4	28.98	3.28502	0.008	0.034	0.017	0.028	0.112	0.018	0.057	0.024	0.298
86026	1	61	1	3	1	1.32	34.4	1	2	280	26.3	65.77	4.25726	0.008	0.034	0.038	0.028	0.112	0.018	0.018	0.024	0.28
86034	1	48	3	5	1	5	32.2	2	1	530	21.5	28.76	18.4284	0.008	0.034	0.017	0.028	0.112	0.018	0.036	0.024	0.277
86036	1	61	1	2	1	0.82	38	1	1	268	27.6	28.14	9.52381	0.197	0.034	0.26	0.028	0.112	0.101	0.716	0.354	1.802
86054	1	40	4	2	5	2.4558	33.5	1	1	611	31	68.74	8.88857	0.047	0.034	0.096	0.043	0.112	0.027	0.427	0.126	0.912
86061	1	37	3	3	4	2.53	37.3	1	1	245	13.7	11.33	21.624	0.188	0.034	0.243	0.028	0.112	0.091	0.617	0.226	1.539
86062	1	80	3	4	1	2.75	22.3	1	2	124	9.82	76.37	1.62367	0.008	0.034	0.017	0.134	0.112	0.018	0.077	0.024	0.424
86063	1	64	3	3	1	0.63	29.4	2	1	283	18.5	53.77	5.26316	0.008	0.034	0.048	0.028	0.112	0.018	0.076	0.024	0.348
86065	1	69	3	3	1	2.03	41	1	1	359	42.4	64.96	5.52648	0.008	0.034	0.017	0.761	0.112	0.018	0.027	0.024	1.001
86067	1	51	2	1	3	0.75	27.9	1	1	168	8.96	28.47	5.90095	0.063	0.231	0.128	0.48	0.112	0.044	0.443	0.25	1.751
86068	1	20	5	4	5	0.58	35.5	2	2	155	19.9	7.9	19.6203	0.008	0.034	0.017	0.046	0.112	0.018	0.049	0.024	0.308
86092	1	36	1	2	1	2.4558	26.9	2	1	120	14.3	22.84	5.25394	0.008	0.089	0.017	0.198	0.112	0.018	2.69	0.07	3.202
86094	1	28	5	5	6	1.07	28.8	1	1	300	13	18.54	16.1812	0.008	0.034	0.017	0.028	0.112	0.018	0.123	0.024	0.364
86104	1	53	4	3	5	0.04	33	1	1	189	41.6	43.26	4.36893	0.091	0.034	0.227	0.048	52.3	0.045	0.52	0.139	53.404
86109	1	64	3	5	4	5	27	1	1	288	19	30.77	9.35977	0.057	0.034	0.205	0.028	0.112	0.034	0.368	0.219	1.057
86112	1	80	3	3	1	1.35	23.3	1	1	356	18.8	59.7	5.96315	0.008	0.034	0.017	8.99	0.112	0.018	0.042	0.024	9.245
86125	1	36	1	2	1	1.83	36	1	2	232	16	11.42	20.3152	0.008	0.034	0.017	0.088	0.112	0.018	0.026	0.024	0.327
86137	1	47	3	4	3	3.22	30.4	1	1	439	21.6	33.65	13.0461	0.165	0.034	0.208	0.044	0.112	0.07	0.77	0.339	1.742
86139	1	69	5	5	2	2.4558	20.9	1	1	161	7.61	58.53	2.75073	0.361	0.034	0.417	0.107	0.112	0.18	1.1	0.434	2.745
86144	1	25	4	5	5	1.26	29.8	2	1	635	28	30.08	21.1104	0.008	0.034	0.017	0.172	0.112	0.027	0.276	0.051	0.697
86152	1	25	5	4	5	2.81	20.9	1	1	491	26.2	29.4	16.7007	0.054	0.034	0.125	0.028	0.112	0.034	0.278	0.118	0.783
86168	1	80	3	4	1	2.18	29.8	1	2	186	9.59	42.52	4.37441	0.008	0.034	0.017	0.028	0.112	0.018	0.061	0.041	0.319
86173	1	31	3	4	1	4.06	19.7	1	1	417	15.6	56.97	7.31964	0.064	0.034	0.149	0.028	0.112	0.035	0.264	0.122	0.808
86178	1	69	4	1	4	0.88	30.2	1	1	508	32.9	49.91	10.1783	0.11	0.034	0.188	26.7	0.112	0.04	0.419	0.151	27.754
86182	1	54	1	3	1	5	26.1	2	1	509	23.6	50.03	10.1739	0.008	0.034	0.027	0.058	0.112	0.018	0.038	0.024	0.319
86197	1	62	2	2	4	1.53	19	1	1	1220	49.7	165.1	7.38946	0.366	0.126	0.57	0.028	0.4074	0.252	1.98	1.23	4.9594
86203	1	48	3	3	1	5	25.9	1	1	353	25	57.41	6.14875	0.239	0.118	0.363	0.028	0.112	0.142	1.65	0.895	3.547
86205	1	25	3	4	5	3.82	30.3	2	1	541	27.8	63.23	8.55607	0.008	0.034	0.034	0.122	0.112	0.018	0.262	0.261	0.851
86213	1	39	5	1	1	1.77	28.4	2	1	356	16.7	40.18	8.86013	0.008	0.034	0.017	0.028	0.112	0.018	0.146	0.066	0.429
86215	1	63	3	2	1	5	28.5	2	1	520	14.4	83.53	6.22531	0.008	0.034	0.017	0.028	0.112	0.018	0.107	0.053	0.377
86220	1	38	4	4	6	0.92	28.9	1	1	749	28.9	64.36	11.6377	0.054	0.034	0.079	2.47	0.112	0.034	0.264	0.114	3.161
86236	1	34	4	5	1	2.62	41.7	1	1	543	33.6	36.05	15.0624	0.016	0.034	0.042	3.76	0.112	0.018	0.157	0.073	4.212
86246	1	33	5	5	1	2.4558	18.9	2	2	322	17.7	27.76	11.5994	0.008	0.034	0.017	0.24	0.112	0.018	0.039	0.024	0.492
86261	1	24	3	3	6	5	37.2	1	1	337	25.4	28.31	11.9039	0.013	0.034	0.238	0.028	0.112	0.018	0.794	0.362	1.599
86276	1	68	1	4	1	1.76	30.9	1	1	413	23.5	64.46	6.40707	0.008	0.034	0.017	5.33	0.4074	0.018	0.062	0.056	5.9324
86278	1	22	2	1	5	0.89	24.7	1	2	292	13.9	25.12	11.6242	0.008	0.034	0.017	1.02	0.112	0.018	0.067	0.024	1.3
86281	1	26	5	5	5	2.69	27.6	2	1	372	30.4	9.17	40.5671	0.008	0.034	0.017	0.028	0.112	0.018	0.088	0.024	0.329
86284	1	46	1	4	1	1.05	29.2	1	1	329	16.2	44.7	7.36018	0.251	0.034	0.602	0.079	0.112	0.172	1.17	0.465	2.885
86299	1	41	1	1	1	0	20.5	2	1	825	21.7	71.45	11.5465	0.107	0.034	0.155	1.61	0.112	0.037	0.538	0.228	2.821
86312	1	58	4	5	3	5	34.1	2	1	320	32.8	22.02	14.5322	0.008	0.034	0.017	0.028	0.4074	0.018	0.054	0.071	0.6374
86318	1	63	3	5	5	0.92	25.6	1	1	414	23.9	36.24	11.4238	0.008	0.034	0.026	0.028	0.112	0.018	0.105	0.055	0.386
86325	1	60	2	5	3	0.1	26.9	1	1	260	18.9	51.27	5.07119	0.364	0.034	0.698	0.319	0.4074	0.147	1.44	0.468	3.8774
86328	1	75	4	5	1	5	31.9	2	1	560	50.3	88.4	6.33484	0.008	0.034	0.066	0.028	0.112	0.018	0.066	0.038	0.37
86338	1	55	1	2	1	0.67	31.2	2	1	468	16.8	46.31	10.1058	0.008	8.72	0.04	20.8	0.112	0.018	0.179	0.386	30.263
86347	1	54	3	3	3	0.84	27.9	1	1	490	30.7	66.18	7.40405	0.008	0.034	0.017	0.028	0.112	0.018	0.108	0.024	0.349
86348	1	35	5	5	1	5	26.9	2	2	386	26.2	28.02	13.7759	0.008	0.034	0.017	0.115	0.112	0.018	0.029	0.024	0.357
86349	1	71	5	3	1	5	23.1	1	1	535	20.4	102.5	5.21951	0.008	4.45	0.017	0.028	0.112	0.018	3.64	0.058	8.331
86351	1	53	3	3	1	3.45	29.2	1	1	369	13.4	40.86	9.03084	0.008	0.034	0.017	0.028	0.112	0.018	0.096	0.059	0.372
86354	1	37	1	3	1	1.65	54.7	1	1	537	60.9	109.8	4.89071	0.008	0.034	0.048	0.066	0.112	0.018	0.069	0.024	0.379
86359	1	37	3	3	5	4.38	23.8	2	2	748	27.8	94.45	7.91953	0.008	0.034	0.017	0.028	0.112	0.018	0.078	0.059	0.354
86365	1	68	1	1	1	1.19	28.5	1	1	663	31.5	55.21	12.0087	0.008	0.034	0.065	0.24	0.112	0.018	0.362	0.234	1.073
86367	1	48	1	4	6	0.8	32.6	2	1	254	15.4	29.94	8.48363	0.008	0.034	0.017	0.043	0.112	0.018	0.064	0.059	0.355
86368	1	52	4	3	1	5	36.3	2	2	248	17.5	49.2	5.04065	0.008	0.034	0.017	0.112	0.112	0.018	0.051	0.024	0.376
86379	1	42	3	3	3	1.27	25.6	2	1	386	26.1	35.7	10.8123	0.008	0.034	0.042	0.264	0.112	0.018	0.047	0.039	0.564
86393	1	45	5	3	1	2.88	20.4	2	2	342	12.4	29.18	11.7204	0.008	0.034	0.017	0.083	0.112	0.018	0.135	0.121	0.528
86405	1	80	4	4	2	1.33	33.5	2	2	402	24.6	75.47	5.32662	0.008	0.034	0.017	0.049	0.112	0.018	0.033	0.024	0.295
86417	1	40	4	2	6	2.4558	23.9	1	1	2000	87.8	290.7	6.87994	0.036	0.034	0.093	0.028	0.112	0.025	0.238	0.101	0.667
86418	1	57	4	4	1	5	36.1	1	1	218	25.6	33.2	6.56627	0.008	0.034	0.017	0.028	0.112	0.018	0.042	0.024	0.283
86424	1	23	1	3	1	1.22	33.5	2	1	282	21.1	12.3	22.9268	0.008	0.034	0.057	0.896	0.112	0.018	0.072	0.101	1.298
86428	1	39	3	4	1	0.74	34.5	1	2	181	14.1	19.33	9.36368	0.085	0.034	0.168	0.047	0.112	0.046	0.446	0.164	1.102
86435	1	72	1	1	1	1.44	21.2	2	1	382	18.7	59.22	6.45052	0.008	0.034	0.033	0.928	0.112	0.018	0.19	0.093	1.416
86439	1	67	1	1	6	2.49	23.4	1	1	205	11.1	42.36	4.83947	0.008	0.034	0.017	0.514	0.112	0.018	0.052	0.036	0.791
86444	1	44	4	5	1	0.51	44.1	2	2	220	36.9	23.36	9.41781	0.008	0.034	0.017	0.186	0.112	0.018	0.082	0.046	0.503
86445	1	51	5	5	1	4.46	27.7	1	1	250	17.8	14.64	17.0765	0.008	0.034	0.033	0.769	0.112	0.018	0.231	0.2	1.405
86450	1	77	2	1	1	2.4558	21.7	2	1	451	9.91	123.2	3.66071	0.008	0.034	0.028	0.85	0.112	0.018	0.075	0.045	1.17
86480	1	65	2	3	1	2.7	25.3	1	1	228	9.62	22	10.3636	0.008	0.034	0.017	0.343	0.112	0.018	0.059	0.042	0.633
86483	1	22	5	4	5	4.03	24.3	2	1	578	31.3	30.22	19.1264	0.008	0.034	0.017	0.028	0.112	0.018	0.053	0.024	0.294
86487	1	43	2	4	5	3.42	29.9	1	1	365	11.6	31.69	11.5178	0.078	0.034	0.172	0.028	0.112	0.045	0.396	0.163	1.028
86514	1	44	3	3	1	1.91	32.6	2	2	342	17	48.99	6.98102	0.008	0.034	0.034	0.221	0.4074	0.018	0.105	0.054	0.8814
86518	1	26	4	5	5	1.64	25.8	2	1	442	31.6	40.89	10.8095	0.008	0.034	0.017	0.46	0.112	0.018	0.134	0.043	0.826
86521	1	50	1	1	4	2.12	23.4	1	1	449	15.9	63.9	7.0266	0.095	0.034	0.185	0.028	0.112	0.058	0.428	0.211	1.151
86525	1	68	4	3	3	1.47	24.7	1	2	379	43.6	39.79	9.52501	0.084	0.034	0.144	0.928	0.112	0.067	0.353	0.134	1.856
86540	1	43	2	1	5	0.56	32	2	1	426	30.7	39.77	10.7116	0.008	0.034	0.017	0.578	0.112	0.018	0.034	1.55	2.351
86548	1	69	5	2	1	2.4558	23.2	1	1	405	31.2	31.91	12.6919	0.056	0.034	0.075	0.028	0.112	0.033	0.227	0.084	0.649
86551	1	25	4	3	6	0.65	19.8	1	2	700	21.8	62.84	11.1394	0.055	0.034	0.229	0.213	0.112	0.053	0.596	0.35	1.642
86555	1	33	4	3	5	1.09	28.8	1	1	422	31.3	34.03	12.4008	0.12	0.034	0.226	4.11	0.112	0.097	0.545	0.178	5.422
86564	1	64	4	5	3	5	19.9	1	1	262	20.8	79.81	3.2828	0.195	0.034	0.234	0.028	0.112	0.078	0.892	0.31	1.883
86569	1	23	1	4	6	3.12	35.9	2	1	354	19.2	26.31	13.455	0.008	0.034	0.017	0.028	0.112	0.018	1.21	0.051	1.478
86573	1	65	5	5	5	1.52	26.1	2	2	479	33.2	60.75	7.88477	0.008	0.034	0.051	0.276	0.112	0.018	0.071	0.024	0.594
86574	1	30	3	4	5	2.98	42.2	1	1	376	32.4	24.54	15.3219	0.008	0.034	0.017	0.129	0.112	0.018	0.062	0.036	0.416
86583	1	70	4	4	2	2.19	29.3	2	2	486	49.8	52.01	9.34436	0.008	0.034	0.1012	0.745	0.112	0.018	0.155	0.024	1.1972
86588	1	65	1	1	1	2.79	30.6	1	1	404	15.7	62.69	6.44441	0.008	0.034	0.028	1.17	0.112	0.018	0.057	0.024	1.451
86592	1	28	4	4	5	4.37	34.9	1	1	411	26	31.81	12.9205	0.008	0.034	0.017	0.175	2.26	0.018	0.046	0.034	2.592
86597	1	69	3	4	1	1.26	26.6	2	1	517	35.4	78.79	6.56175	0.008	0.034	0.048	0.028	0.112	0.018	0.098	0.055	0.401
86599	1	27	3	4	6	1.73	21.3	2	1	647	15.3	97.17	6.65843	0.008	0.034	0.03	0.04	0.112	0.018	0.047	0.039	0.328
86601	1	23	2	2	5	2.4558	28.4	2	1	403	29.6	19.64	20.5193	0.008	0.034	0.017	0.068	0.112	0.018	0.032	0.024	0.313
86604	1	80	3	4	3	1.61	27.9	1	2	228	13.6	61.59	3.7019	0.091	0.034	0.232	0.028	0.112	0.066	0.405	0.136	1.104
86609	1	33	4	1	5	0	28	1	1	489	35.9	22.58	21.6563	0.065	0.034	0.139	0.161	0.112	0.037	0.377	0.174	1.099
86614	1	55	5	5	1	2.4558	39.1	2	2	215	24.6	34.31	6.26639	0.008	0.034	0.017	0.12	0.112	0.018	0.042	0.061	0.412
86624	1	51	3	5	1	5	28	2	1	562	33.4	65.86	8.53325	0.008	0.034	0.017	0.363	0.112	0.018	0.058	0.038	0.648
86640	1	59	3	3	5	0.75	24.5	1	1	676	31	56.17	12.0349	0.021	0.034	0.033	0.028	0.112	0.018	0.087	0.048	0.381
86652	1	59	1	1	1	2.24	28.9	1	1	548	21.8	68.65	7.98252	0.008	0.034	0.037	0.028	0.112	0.018	0.077	0.067	0.381
86655	1	54	3	5	6	1.15	22	1	1	425	21	59.92	7.09279	0.09	0.034	0.225	0.028	0.112	0.069	0.454	0.158	1.17
86657	1	67	4	4	1	5	29.2	1	2	280	25.3	45.67	6.13094	0.008	0.034	0.028	0.115	0.4074	0.018	0.089	0.038	0.7374
86661	1	62	2	2	5	0.42	27.3	2	2	573	18.3	70.46	8.13227	0.008	0.034	0.017	5.17	0.112	0.018	0.082	0.05	5.491
86662	1	70	4	3	3	2.53	28.9	2	2	296	18	64.61	4.58133	0.008	0.034	0.017	0.07	0.112	0.025	0.054	0.054	0.374
86663	1	40	1	5	1	1.49	30.2	1	1	235	10.6	23.95	9.81211	0.043	0.034	0.1012	0.174	0.112	0.018	0.194	0.101	0.7772
86664	1	69	4	3	1	2.5	31.6	1	2	285	20.9	31.94	8.92298	0.008	0.034	0.017	0.281	0.112	0.018	0.036	0.024	0.53
86668	1	37	2	4	5	1.49	23.8	1	1	352	11	48.94	7.19248	0.091	0.034	0.209	0.028	0.112	0.073	0.458	0.178	1.183
86674	1	62	3	5	1	4.61	45	1	1	399	53	67.68	5.89539	0.008	0.034	0.047	0.028	0.112	0.018	0.138	0.115	0.5
86699	1	71	3	3	1	1.26	31.2	2	2	538	33.6	69.64	7.72545	0.008	0.173	0.017	0.096	0.112	0.018	0.041	0.052	0.517
86701	1	49	5	5	1	2.4558	23	2	1	322	21	20.3	15.8621	0.008	0.034	0.017	0.047	0.112	0.018	0.079	0.065	0.38
86710	1	33	5	5	1	3.75	19.1	2	1	447	20.8	27.74	16.1139	0.008	0.034	0.017	0.028	0.112	0.018	0.036	0.024	0.277
86712	1	64	5	4	1	4.06	23.3	1	1	338	21.7	45.14	7.48782	0.008	0.034	0.017	1.68	0.4074	0.018	0.052	0.024	2.2404
86713	1	65	4	3	1	2.4558	28.7	1	1	305	13.8	26.33	11.5837	0.207	0.034	0.337	0.028	12.4	0.064	0.651	0.124	13.845
86715	1	50	3	3	1	1.77	29.1	1	1	593	36	40.26	14.7293	0.231	0.034	0.346	0.046	0.112	0.091	3.08	0.22	4.16
86718	1	44	4	2	6	1.19	23.4	1	1	473	34.5	61.46	7.69606	0.206	0.034	0.498	0.143	0.112	0.123	1.06	0.333	2.509
86719	1	62	4	4	5	0.94	35.2	2	1	269	27.3	63.4	4.2429	0.008	0.034	0.043	0.051	0.4074	0.018	0.085	0.069	0.7154
86730	1	78	3	5	1	1.4	27.7	1	1	462	23.4	79.54	5.8084	0.008	0.034	0.017	0.114	0.112	0.018	0.092	0.056	0.451
86731	1	29	2	3	1	2.4558	25	1	1	251	25.1	17.4	14.4253	0.008	0.034	0.017	0.24	0.112	0.018	0.044	0.024	0.497
86733	1	35	3	5	1	4.37	24.6	1	1	394	19	62.32	6.32221	0.011	0.034	0.23	0.028	0.112	0.025	0.318	0.287	1.045
86737	1	50	2	4	1	2.4558	17.2	2	1	682	27.1	63.8	10.6897	0.008	0.034	0.017	0.904	0.112	0.018	0.067	0.048	1.208
86740	1	57	2	2	1	3.14	26.8	1	1	636	38.2	23.51	27.0523	0.147	0.034	0.215	0.028	0.112	0.088	0.598	0.215	1.437
86744	1	25	4	3	5	1.32	22.1	1	1	254	9.77	30.09	8.44134	0.288	0.034	0.851	0.124	0.112	0.33	1.71	0.69	4.139
86755	1	28	3	4	1	1.65	22.7	1	2	673	36.8	42.8	15.7243	0.008	0.034	0.057	0.054	0.112	0.018	0.055	0.034	0.372
86774	1	43	1	2	5	1.32	35.3	1	1	620	33.2	48.64	12.7467	0.031	0.034	0.07	0.053	1.97	0.018	0.193	0.089	2.458
86777	1	52	2	1	6	2.4558	28.1	1	1	499	25.4	50.04	9.97202	0.192	0.034	0.239	1.03	0.112	0.09	0.666	0.238	2.601
86784	1	64	5	5	1	1.63	20.4	1	2	325	15.7	43.69	7.43877	0.008	0.034	0.017	0.175	0.112	0.018	0.061	0.024	0.449
86792	1	45	2	5	3	5	29.2	2	2	312	19.8	35.23	8.85609	0.008	0.203	0.047	0.137	0.112	0.018	0.133	0.041	0.699
86794	1	71	3	4	3	0.92	30.7	1	1	696	37.8	103.8	6.7052	0.066	0.034	0.126	0.028	0.112	0.051	0.281	0.128	0.826
86801	1	30	4	3	1	1.47	30.8	1	1	204	24.1	14.16	14.4068	0.053	0.034	0.078	4.59	0.4074	0.029	0.257	0.096	5.5444
86806	1	64	4	5	2	1	24.9	1	1	391	32.3	62.36	6.27004	0.141	0.034	0.252	0.128	0.112	0.064	0.614	0.178	1.523
86809	1	59	3	4	5	5	23.5	1	1	1220	97.3	38.05	32.0631	0.281	0.034	0.283	0.047	0.112	0.092	0.9	0.325	2.074
86815	1	33	1	1	1	0.91	25.6	1	1	484	23.1	25.7	18.8327	0.008	0.034	0.052	17.9	0.112	0.018	0.088	0.066	18.278
86817	1	60	1	3	1	2.4558	30.4	2	1	598	33.1	91.46	6.53838	0.008	0.034	0.017	0.076	0.112	0.018	0.073	0.083	0.421
86824	1	70	4	4	1	2.82	26.5	1	1	483	14.2	63.45	7.61229	0.008	0.034	0.017	0.028	0.112	0.018	0.047	0.024	0.288
86831	1	70	1	1	2	0.15	22.4	1	1	575	23.2	65.35	8.79878	0.041	0.034	0.526	0.028	11.6	0.05	0.969	0.333	13.581
86837	1	57	3	2	1	1.24	28.7	1	1	528	24	40.13	13.1572	0.046	0.034	0.089	0.028	0.112	0.031	0.215	0.081	0.636
86844	1	39	2	1	4	2.4558	28.8	2	1	459	16.4	37.37	12.2826	0.008	0.034	0.017	0.608	0.112	0.018	3.07	0.242	4.109
86848	1	58	4	3	3	0.55	49	1	1	222	24.9	53.46	4.15264	0.066	0.034	0.109	0.028	0.112	0.042	0.292	0.107	0.79
86856	1	54	3	4	1	5	24.3	2	1	361	25.7	43.27	8.34296	0.008	0.034	0.017	0.044	0.112	0.018	0.048	0.024	0.305
86871	1	73	3	4	3	1.77	24	1	1	555	32.2	116	4.78448	0.235	0.034	0.316	0.249	0.112	0.088	0.69	0.187	1.911
86886	1	52	1	3	1	1.02	27.6	2	2	420	25.9	25.11	16.7264	0.008	0.034	0.017	82.6	0.112	0.018	0.366	0.024	83.179
86888	1	24	4	4	6	1.21	36.3	1	2	329	12.1	40.18	8.18815	0.113	0.034	0.261	0.278	0.112	0.076	0.654	0.253	1.781
86894	1	45	1	1	1	1.54	31.4	2	1	272	20	21.57	12.6101	0.008	0.034	0.017	1.31	0.4074	0.018	0.049	0.041	1.8844
86897	1	40	4	5	5	5	22.8	2	1	789	26.5	78.61	10.0369	0.008	0.034	0.017	0.275	0.112	0.018	0.052	0.024	0.54
86909	1	48	5	4	1	3.92	31.6	1	1	699	42	78.26	8.93177	0.108	0.034	0.147	0.093	0.4074	0.05	0.408	0.15	1.3974
86911	1	25	3	5	1	2.46	25.6	2	1	430	15.1	36.78	11.6911	0.008	0.034	0.017	0.028	0.112	0.018	0.046	0.024	0.287
86920	1	27	5	4	1	0.42	29.9	1	2	840	28.9	46.33	18.1308	0.112	0.034	0.16	0.028	0.112	0.061	0.383	0.168	1.058
86925	1	80	4	2	2	1.35	24	1	1	164	12.6	86.59	1.89398	0.008	0.051	0.038	1.05	0.112	0.018	0.041	0.024	1.342
86928	1	52	3	3	3	1.67	30.3	1	1	551	28.7	64.57	8.53337	0.008	0.034	0.017	0.028	0.112	0.018	0.048	0.024	0.289
86929	1	52	3	4	1	3.93	32.3	1	1	383	25	34.86	10.9868	0.152	0.034	0.2	0.081	0.112	0.068	1.39	0.302	2.339
86940	1	64	5	5	1	4.39	26.3	2	1	325	29.1	30.21	10.758	0.008	0.034	0.017	2.82	0.112	0.018	0.057	0.024	3.09
86970	1	20	2	3	5	3.83	37.3	2	2	355	37.1	14.71	24.1332	0.008	0.034	0.017	0.028	0.112	0.018	0.026	0.024	0.267
86980	1	54	5	5	5	2.55	23.1	2	1	372	24.4	32.3	11.517	0.008	0.034	0.029	0.028	0.112	0.018	0.11	0.053	0.392
86985	1	34	5	3	5	1.68	22	2	1	721	23.5	95.75	7.53003	0.008	0.034	0.017	0.068	0.112	0.018	0.064	0.043	0.364
86987	1	76	3	4	1	1.82	23.5	1	1	571	20.1	77.57	7.36109	0.032	0.034	0.1	0.028	0.112	0.018	0.371	0.216	0.911
86992	1	23	3	5	6	2.95	18.5	2	1	433	12.4	72.31	5.98811	0.008	0.034	0.029	0.028	0.112	0.018	0.042	0.05	0.321
86994	1	70	2	5	1	1.32	23.2	1	2	247	19.6	58.01	4.25789	0.008	0.034	0.055	0.313	0.112	0.018	0.08	0.024	0.644
87003	1	53	3	5	1	2.4558	31.4	2	1	423	25.4	40.47	10.4522	0.008	0.034	0.017	0.028	0.112	0.018	0.116	0.039	0.372
87004	1	37	3	3	1	1.84	29	1	1	197	14.6	27.12	7.26401	0.008	0.034	0.017	0.028	0.112	0.018	0.041	0.024	0.282
87008	1	63	4	4	2	3.87	26	1	1	453	32.4	53.38	8.48632	0.134	0.034	0.269	0.114	0.112	0.091	0.675	0.29	1.719
87036	1	22	5	4	5	4.94	28.2	2	1	598	47.1	26.42	22.6344	0.008	0.034	0.017	0.028	0.112	0.018	0.058	0.034	0.309
87064	1	64	2	2	3	1.23	23.5	1	1	513	33.3	53.4	9.60674	0.008	0.034	0.017	0.492	0.173	0.018	0.048	0.024	0.814
87072	1	52	4	3	1	2.4558	25.8	2	1	362	21.6	53.66	6.74618	0.008	0.034	0.017	0.045	0.112	0.018	0.099	0.038	0.371
87073	1	27	1	2	1	2.4558	29.3	1	2	339	17	24.83	13.6528	0.008	0.08	0.017	3.42	0.112	0.018	0.036	0.024	3.715
87113	1	68	2	5	1	1.06	31.3	1	1	335	30.9	29.46	11.3714	0.008	0.034	0.045	0.147	0.112	0.018	0.185	0.066	0.615
87123	1	68	3	4	1	2.49	24	1	1	521	23.5	55.17	9.44354	0.008	0.034	0.017	0.028	0.112	0.018	0.164	0.11	0.491
87132	1	39	1	3	1	4.73	28.1	1	2	415	26.9	32.96	12.591	0.104	0.034	0.244	0.028	0.112	0.09	0.669	0.255	1.536
87135	1	57	3	5	6	2.95	44.5	2	1	419	37.9	41.7	10.048	0.008	0.034	0.017	0.028	0.112	0.018	0.072	0.047	0.336
87137	1	26	3	3	6	0.77	24.8	1	1	787	29	52.5	14.9905	0.008	0.034	0.34	0.028	0.112	0.037	0.349	0.207	1.115
87138	1	45	3	5	1	2.47	29.3	2	1	394	17	33.26	11.8461	0.008	0.034	0.024	0.028	0.112	0.018	0.081	0.09	0.395
87141	1	37	3	5	1	5	30.3	2	1	318	19.1	22.69	14.015	0.008	0.034	0.017	0.028	0.112	0.018	0.04	0.024	0.281
87145	1	78	3	5	1	5	26.1	2	2	357	25.6	48.86	7.30659	0.008	0.034	0.017	0.028	0.112	0.018	0.065	0.036	0.318
87170	1	50	1	2	1	0.21	23.5	2	2	318	18.9	27.89	11.4019	0.008	0.034	0.029	0.069	0.112	0.018	0.04	0.04	0.35
87176	1	27	5	3	6	2.23	34.8	1	1	326	20.7	50.21	6.49273	0.022	0.034	0.094	0.028	0.112	0.018	0.386	0.137	0.831
87186	1	61	2	4	5	2.4558	33.1	1	1	211	18.1	12.24	17.2386	0.056	0.034	0.112	0.16	0.112	0.034	0.68	0.15	1.338
87187	1	45	5	5	1	3.87	26.9	2	2	229	13.1	17.19	13.3217	0.056	0.055	0.052	0.089	0.112	0.018	0.16	0.071	0.613
87190	1	38	4	4	3	3.54	37.6	2	2	566	44.4	43.23	13.0928	0.008	0.034	0.017	1.38	0.112	0.018	0.121	0.041	1.731
87198	1	69	5	4	3	0.8	27.9	2	2	378	25.8	77.56	4.87365	0.008	0.034	0.017	0.112	0.112	0.018	0.198	0.083	0.582
87199	1	55	1	1	1	1.2	32.9	2	1	461	18.6	60.64	7.60224	0.008	0.034	0.017	29.1	0.112	0.018	0.035	0.024	29.348
87211	1	41	3	4	1	4.3	30.5	1	1	522	24.1	51.51	10.134	0.008	0.034	0.038	0.028	0.112	0.018	0.081	0.045	0.364
87214	1	38	5	5	1	5	26.9	2	2	531	17	26.78	19.8282	0.008	0.034	0.017	0.028	0.112	0.018	0.056	0.024	0.297
87221	1	63	4	4	1	5	44.7	2	1	140	31.2	39.64	3.53179	0.008	0.034	0.017	0.081	0.112	0.018	0.055	0.047	0.372
87225	1	35	3	2	5	1.64	28.9	2	2	358	14.2	34.59	10.3498	0.008	0.034	0.017	0.071	0.112	0.018	0.048	0.024	0.332
87230	1	27	3	3	1	1.49	22.6	1	1	395	16.6	32.73	12.0684	0.163	0.074	0.213	0.028	0.112	0.065	0.565	0.211	1.431
87231	1	57	1	4	1	2.13	29.2	1	1	415	17.3	48.54	8.54965	0.107	0.034	0.144	0.085	0.112	0.053	0.412	0.154	1.101
87235	1	43	4	3	6	0.87	22.2	1	1	532	17.3	60.21	8.83574	0.754	0.034	1.24	0.051	17.6	0.268	2.13	0.561	22.638
87245	1	29	1	2	4	0.75	38.1	1	1	422	24.9	32.58	12.9527	0.008	0.034	0.105	0.098	0.112	0.018	0.142	0.068	0.585
87248	1	55	3	4	3	5	36	2	1	297	27.8	32.86	9.03834	0.008	0.034	0.017	0.028	0.112	0.018	0.14	0.121	0.478
87260	1	61	4	3	1	2.4558	52.4	2	2	302	67	67	4.50746	0.008	0.034	0.017	0.052	0.112	0.018	0.13	0.038	0.409
87264	1	38	5	3	5	0.94	21.6	1	1	957	46.5	77.64	12.3261	0.068	0.034	0.121	0.163	0.112	0.04	0.335	0.131	1.004
87265	1	42	5	5	1	0.91	25	2	1	488	26.1	45.13	10.8132	0.008	0.034	0.017	0.028	0.112	0.018	0.048	0.024	0.289
87270	1	63	3	5	1	2.2	19.8	2	1	500	17.8	54.1	9.24214	0.008	16	0.04	0.028	0.112	0.018	0.14	0.066	16.412
87278	1	46	3	5	1	5	29.4	2	1	437	31.3	27.66	15.799	0.008	0.068	0.017	0.055	0.4074	0.018	0.032	0.024	0.6294
87291	1	39	2	1	1	2.38	26.5	1	2	607	23.3	49.89	12.1668	0.008	0.034	0.017	2.09	0.112	0.018	0.073	0.024	2.376
87292	1	41	5	5	1	5	25	1	1	523	27.7	41.29	12.6665	0.008	0.034	0.017	0.028	0.112	0.018	0.044	0.024	0.285
87301	1	69	3	3	1	2.4558	26.7	1	1	349	21.4	52.46	6.65269	0.233	0.034	0.261	0.028	0.112	0.125	0.748	0.306	1.847
87310	1	29	5	5	1	4.08	32.5	1	1	223	30.2	11.32	19.6996	0.008	0.034	0.017	0.8817	0.112	0.018	0.067	0.024	1.1617
87312	1	29	5	5	5	1.35	28.1	1	1	440	32	25.58	17.2009	0.008	0.034	0.017	0.028	0.112	0.018	0.122	0.043	0.382
87333	1	40	3	2	6	2.96	33	1	1	468	28.8	24.67	18.9704	0.008	4.24	0.044	0.028	0.112	0.018	0.479	0.403	5.332
87334	1	36	2	4	1	2.4558	26.5	2	2	283	10.8	23.64	11.9712	0.008	0.034	0.017	0.553	0.112	0.018	7.53	3.7	11.972
87344	1	22	3	4	5	4.67	24.3	1	1	524	23.6	60.76	8.62409	0.015	0.135	0.029	0.028	0.112	0.018	0.119	0.765	1.221
87349	1	25	3	5	5	1.91	23.5	2	1	292	16.3	13.24	22.0544	0.008	0.034	0.017	0.028	0.112	0.018	0.055	0.041	0.313
87351	1	38	3	4	5	0.42	31.5	1	1	333	20.2	31.58	10.5446	0.008	0.034	0.017	0.028	0.112	0.018	0.085	0.058	0.36
87362	1	25	5	5	5	0.3	22.7	1	1	518	25.5	27.59	18.7749	0.075	0.034	0.124	0.086	0.112	0.047	0.311	0.132	0.921
87365	1	30	4	5	5	2.1	43.9	1	1	391	40.7	27.76	14.085	0.066	0.034	0.145	0.777	0.112	0.05	0.433	0.151	1.768
87373	1	29	3	5	5	5	29.4	2	1	311	20.7	36.81	8.44879	0.008	0.034	0.017	0.9	0.449	0.018	0.048	0.024	1.498
87377	1	54	3	5	1	3.38	25	2	1	334	20	35.52	9.40315	0.008	0.102	0.017	0.028	0.112	0.018	0.042	0.024	0.351
87393	1	26	1	2	5	2.4558	21.1	2	1	695	27.6	35.37	19.6494	0.049	0.034	0.095	2.49	0.112	0.025	0.223	0.091	3.119
87406	1	22	5	5	5	2.4558	23.9	2	2	700	23.6	47.46	14.7493	0.008	0.034	0.017	0.028	0.112	0.018	0.074	0.057	0.348
87422	1	20	3	3	6	1.15	27.2	1	1	749	24.6	45.19	16.5745	0.1	0.034	0.147	0.044	0.112	0.037	0.333	0.174	0.981
87435	1	80	1	1	1	0.9	32.2	2	2	306	13.6	67.09	4.56104	0.008	0.034	0.1012	9.42	0.112	0.018	0.124	0.108	9.9252
87437	1	43	5	5	1	5	27	2	2	335	24.8	34.03	9.84426	0.008	0.034	0.017	0.073	0.112	0.018	0.107	0.04	0.409
87448	1	49	4	3	6	0.31	28.4	1	2	529	19.6	56.46	9.36947	0.261	0.034	0.427	0.028	0.112	0.194	0.964	0.347	2.367
87464	1	70	1	1	1	0.31	32	1	1	186	13.5	32.89	5.65521	0.008	0.034	0.017	0.028	0.112	0.018	0.029	0.024	0.27
87472	1	22	3	3	5	5	33.2	1	1	359	21.9	12.29	29.2107	0.063	0.034	0.178	0.028	0.4074	0.053	0.296	19.6	20.6594
87477	1	59	2	4	1	2.4558	28.2	1	1	298	17.6	40.47	7.36348	0.008	0.034	0.017	0.028	0.112	0.018	0.042	0.06	0.319
87481	1	42	5	4	6	1.61	29.8	2	2	460	27.8	45.85	10.0327	0.008	0.034	0.034	0.299	0.112	0.018	0.148	0.187	0.84
87488	1	44	4	5	1	1.82	28.7	2	1	187	31.3	20	9.35	0.008	0.064	0.017	0.028	0.112	0.018	0.057	0.024	0.328
87489	1	61	3	3	1	3.64	32.8	1	1	181	20	23.53	7.69231	0.008	0.034	0.051	0.253	0.112	0.018	0.046	0.045	0.567
87494	1	59	2	2	6	1.07	26.5	1	1	199	15.1	23.88	8.33333	0.008	0.034	0.017	0.993	0.112	0.018	0.116	0.624	1.922
87496	1	58	4	4	5	0.93	32.6	1	1	265	40.6	36.05	7.3509	0.121	0.034	0.532	0.07	0.112	0.058	0.611	0.197	1.735
87505	1	52	4	4	6	2.08	26.7	2	1	313	18.1	35.4	8.84181	0.008	0.034	0.028	0.155	0.112	0.018	0.048	0.024	0.427
87521	1	20	5	4	5	0.92	22.7	2	1	523	32.6	24.88	21.0209	0.008	0.034	0.017	0.028	0.112	0.018	0.04	0.024	0.281
87534	1	67	2	3	1	0.7	24.7	1	2	507	28.5	71.09	7.1318	0.008	0.034	0.017	0.028	0.112	0.018	0.034	0.024	0.275
87564	1	34	2	4	6	2.48	23.4	1	1	561	27	50.23	11.1686	0.024	0.034	0.167	0.252	0.112	0.026	0.384	0.189	1.188
87568	1	73	3	2	1	1.57	36.4	1	1	139	10.3	29.76	4.6707	0.008	0.034	0.017	0.04	0.112	0.018	0.073	0.199	0.501
87573	1	55	5	5	1	2.3	24.5	2	1	465	25	48.28	9.63132	0.008	0.034	0.017	0.028	0.112	0.018	0.035	0.024	0.276
87581	1	80	5	5	1	0.35	21.9	2	2	323	17.9	47.85	6.75026	0.008	0.034	0.017	0.028	0.112	0.018	0.027	0.024	0.268
87582	1	76	2	5	1	5	20.2	2	2	464	33.2	76.7	6.04954	0.008	0.034	0.017	0.18	0.112	0.018	0.083	0.048	0.5
87587	1	54	5	4	1	3.62	23.7	1	1	434	19.1	37.38	11.6105	0.008	0.034	0.017	0.775	0.112	0.018	0.046	0.035	1.045
87591	1	47	5	5	1	1.24	29.1	2	2	285	18.8	31.11	9.16104	0.008	0.034	0.017	0.045	0.112	0.018	0.018	0.024	0.276
87593	1	80	3	5	6	3.03	32.7	1	2	518	38.9	70.61	7.33607	0.008	0.034	0.017	0.028	0.112	0.018	0.032	0.024	0.273
87599	1	27	5	5	5	2.27	20.5	2	2	486	10.5	33.43	14.5378	0.008	0.034	0.017	0.081	0.112	0.018	0.051	0.024	0.345
87603	1	33	3	4	1	2.4558	36.7	1	1	295	19.3	14.74	20.0136	0.182	0.034	0.231	0.077	0.112	0.096	0.702	0.286	1.72
87608	1	53	4	5	1	5	28.2	2	1	522	33.5	61.86	8.43841	0.008	0.034	0.017	0.028	0.112	0.018	0.085	0.107	0.409
87623	1	43	2	5	1	4.94	26.8	2	1	690	31.7	58.26	11.8435	0.008	0.034	0.017	0.028	0.112	0.018	0.042	0.024	0.283
87626	1	63	1	1	1	0.82	34.2	2	1	295	17.3	60.3	4.89221	0.008	0.034	0.017	0.091	0.112	0.018	0.059	0.039	0.378
87649	1	44	3	2	1	2.07	26.3	2	2	202	17.8	14.69	13.7509	0.008	0.075	0.017	0.028	0.112	0.018	0.143	0.058	0.459
87655	1	57	4	3	1	3.12	32.6	2	2	344	31.3	40.37	8.52118	0.008	0.034	0.026	0.028	0.112	0.018	2.26	0.303	2.789
87657	1	22	3	1	5	1.36	24.9	2	2	771	25.8	58.97	13.0744	0.008	0.034	0.017	0.028	0.112	0.018	0.04	0.024	0.281
87663	1	50	3	4	1	5	30.8	2	1	302	29	10.09	29.9306	0.008	0.034	0.017	0.028	0.112	0.018	0.033	0.024	0.274
87672	1	37	3	2	1	2.02	25.3	1	1	429	18.8	38.45	11.1573	0.125	0.034	0.167	0.069	0.112	0.08	0.47	0.161	1.218
87673	1	68	2	2	5	0.35	31.6	1	2	557	24.4	110	5.06364	0.008	0.034	0.046	0.028	0.112	0.018	0.166	0.068	0.48
87690	1	55	5	1	1	1.59	28.7	2	2	243	15	30.43	7.98554	0.008	0.788	0.03	0.112	0.112	0.018	0.064	0.037	1.169
87710	1	62	2	5	1	3.61	26.9	2	1	254	21	57.1	4.44834	0.008	0.034	0.017	0.028	0.112	0.018	0.039	0.024	0.28
87717	1	59	5	4	3	2.4558	22.2	1	1	426	22.4	24.12	17.6617	0.091	0.034	0.114	0.028	0.112	0.039	0.275	0.142	0.835
87750	1	66	2	4	1	2.4558	26.7	1	1	724	25.9	109.2	6.63004	0.093	0.795	0.219	0.359	0.112	0.049	0.56	0.229	2.416
87757	1	49	3	4	1	2.06	29	1	1	170	17.6	22.83	7.44634	0.008	0.034	0.053	0.061	0.112	0.018	0.106	0.058	0.45
87762	1	51	3	2	1	3.3	29.8	1	1	308	14.7	55.55	5.54455	0.14	0.034	0.215	0.028	0.112	0.072	0.584	0.27	1.455
87774	1	24	3	3	1	1.83	29.6	1	1	453	25.2	28.76	15.751	0.075	0.034	0.303	0.089	0.112	0.129	0.972	0.331	2.045
87798	1	36	1	1	1	1.24	31	2	1	461	21.2	32.03	14.3928	0.008	0.034	0.042	0.079	0.112	0.018	0.287	0.817	1.397
87801	1	42	3	2	1	2.67	26.4	1	1	281	14.3	32.28	8.70508	0.008	0.034	0.017	0.041	0.112	0.018	0.038	0.035	0.303
87803	1	62	4	2	1	1.1	28.1	1	1	417	34.5	41.5	10.0482	0.043	0.034	0.06	0.319	0.112	0.018	0.189	0.098	0.873
87805	1	48	5	5	1	3.7	23	1	1	642	33.6	61.75	10.3968	0.008	0.034	0.017	0.202	30.1	0.018	0.045	0.024	30.448
87809	1	74	3	5	1	2.4558	27.6	2	2	361	16.1	55.26	6.53275	0.008	0.034	0.028	0.088	0.112	0.018	0.059	0.024	0.371
87816	1	48	3	4	1	4.28	27.5	2	1	302	11	38.39	7.86663	0.008	0.092	0.017	0.073	0.112	0.018	0.11	0.171	0.601
87827	1	27	2	3	5	4.72	31	1	1	291	11.8	35.28	8.2483	0.008	0.034	0.048	0.13	0.112	0.018	0.153	0.063	0.566
87829	1	23	5	5	5	1.24	28.2	2	1	490	26.6	19.08	25.6813	0.008	0.034	0.017	0.028	0.112	0.018	0.04	0.024	0.281
87830	1	44	3	4	5	1.27	26.7	2	2	669	42	39.79	16.8133	0.008	0.034	0.03	0.028	0.112	0.018	0.062	0.041	0.333
87833	1	47	3	1	5	0.76	27.4	2	2	285	32.4	33.23	8.57659	0.008	0.034	0.017	0.028	0.112	0.018	0.027	0.024	0.268
87843	1	66	1	1	1	1.76	32.6	2	1	473	17.8	70.06	6.75136	0.008	0.034	0.034	0.926	0.112	0.018	0.052	0.024	1.208
87844	1	49	1	3	1	1.18	27.8	1	1	244	14.3	46.8	5.21368	0.041	0.034	0.07	0.028	0.112	0.025	0.202	0.083	0.595
87849	1	24	3	4	1	3.33	37.1	2	2	263	26.2	15.06	17.4635	0.008	0.034	0.017	0.042	0.112	0.018	0.062	0.041	0.334
87857	1	46	2	5	1	5	31.3	1	1	475	35.8	23.29	20.395	0.008	0.034	0.1012	0.083	0.112	0.018	0.208	0.037	0.6012
87875	1	27	3	5	6	5	39	2	1	285	60.5	49.22	5.79033	0.008	0.034	0.017	0.028	0.112	0.018	0.018	0.024	0.259
87885	1	25	4	4	4	0.69	34.5	1	1	519	24.4	28.02	18.5225	0.044	0.034	0.079	0.077	0.112	0.018	0.229	0.078	0.671
87897	1	50	3	5	5	5	42.7	2	2	438	33.4	57.73	7.58704	0.008	0.034	0.017	0.028	0.112	0.018	0.086	0.056	0.359
87898	1	68	3	5	1	2.56	22.1	2	1	544	23.6	88.16	6.1706	0.008	0.034	0.017	0.028	0.112	0.018	0.089	0.064	0.37
87904	1	80	3	3	1	2.4558	25.2	2	2	238	19.7	34.67	6.86472	0.008	0.034	0.017	0.118	0.112	0.018	0.074	0.066	0.447
87909	1	49	4	3	1	5	34.3	2	2	353	33.3	29.18	12.0973	0.008	0.034	0.031	0.028	0.4074	0.018	0.353	0.218	1.0974
87919	1	71	5	5	1	2.4558	28.2	2	1	356	18.7	40.32	8.82937	0.008	0.034	0.028	0.048	0.112	0.018	0.067	0.042	0.357
87921	1	59	3	5	1	3.43	27.8	2	2	352	17.6	49.95	7.04705	0.008	0.034	0.017	0.028	0.112	0.018	0.049	0.093	0.359
87944	1	55	2	2	1	1.76	29.4	1	1	429	30.6	64.67	6.63368	0.008	0.784	0.05	0.054	0.112	0.018	0.066	0.07	1.162
87947	1	34	5	5	1	2.4558	29	2	1	500	20.4	35.95	13.9082	0.008	0.034	0.047	1.78	0.112	0.018	0.054	0.047	2.1
87956	1	57	5	2	1	2.4558	22.2	2	2	317	15.7	33.15	9.56259	0.008	0.034	0.017	0.028	0.112	0.018	0.031	0.024	0.272
87962	1	61	5	4	1	3.77	30.9	1	1	340	38.8	42.92	7.92171	0.008	0.034	0.017	0.077	0.112	0.018	0.063	0.052	0.381
87977	1	80	3	3	1	0.03	35.9	1	1	227	33	53.18	4.26852	0.008	0.034	0.103	0.028	0.112	0.018	0.409	0.295	1.007
87985	1	66	4	4	1	2.4558	31.7	2	1	414	40.1	31.22	13.2607	0.008	0.034	0.045	0.309	0.112	0.018	0.229	0.182	0.937
87997	1	25	4	2	5	2.4558	20.4	1	2	678	23.1	49.99	13.5627	0.392	0.034	0.557	0.087	0.112	0.251	1.66	0.773	3.866
88001	1	63	1	2	1	4.22	27.2	2	1	409	23.7	54.58	7.49359	0.008	0.053	0.017	29	0.112	0.018	0.25	0.075	29.533
88002	1	67	3	5	1	5	39.2	1	1	303	30.4	74.39	4.07313	0.067	0.034	0.255	0.8817	0.112	0.08	0.852	0.338	2.6197
88003	1	66	5	1	1	5	29.5	2	2	171	19.5	38.24	4.47176	0.008	0.034	0.017	0.191	0.112	0.018	0.026	0.024	0.43
88019	1	73	3	3	1	5	31.4	1	1	270	23.6	28.89	9.34579	0.008	0.034	0.017	0.028	0.112	0.018	0.089	0.052	0.358
88020	1	70	3	5	1	5	37.1	2	1	158	17.8	29.47	5.36138	0.008	0.034	0.017	0.028	2.37	0.018	0.066	0.034	2.575
88021	1	60	1	1	1	0.95	33.5	2	1	349	20.6	32.61	10.7022	0.008	0.034	0.017	17.6	0.112	0.018	0.058	0.128	17.975
88030	1	27	1	1	6	1.86	29.1	1	1	319	14.4	27.48	11.6084	0.008	0.034	0.017	0.059	0.112	0.018	0.097	0.041	0.386
88045	1	32	3	4	1	2.18	30.1	2	2	306	23.9	25.8	11.8605	0.008	0.034	0.017	0.098	0.112	0.018	0.086	0.213	0.586
88054	1	62	2	4	4	4.04	27.8	1	1	463	32.9	67.08	6.90221	0.008	0.034	0.126	0.028	0.4074	0.018	0.242	0.189	1.0524
88064	1	35	4	2	5	0.87	38.1	1	1	549	33	33.77	16.257	0.059	0.034	0.114	0.058	0.112	0.032	0.299	0.11	0.818
88069	1	79	4	1	4	0.72	20.3	2	1	695	53	92.24	7.53469	0.008	0.034	0.017	0.595	1.17	0.018	0.054	0.046	1.942
88086	1	31	2	2	5	1.76	25.2	2	1	436	27.2	28.45	15.3251	0.008	0.034	0.054	0.073	0.112	0.018	0.056	0.05	0.405
88103	1	68	1	1	1	1.43	24.5	1	2	361	21.9	66.73	5.40986	0.074	0.034	0.179	0.058	55.7	0.041	0.369	0.1668	56.6218
88112	1	35	3	4	1	0.74	24.1	2	1	231	9.1	21.3	10.8451	0.008	0.034	0.017	0.028	0.112	0.018	0.053	0.05	0.32
88114	1	57	3	4	1	1.86	46.7	1	1	593	17.4	77.38	7.66348	0.008	0.034	0.017	0.091	0.112	0.018	0.053	0.034	0.367
88125	1	61	4	3	1	2.45	31.4	2	1	308	19.9	43.23	7.12468	0.008	0.034	0.017	0.028	0.112	0.018	0.108	0.041	0.366
88131	1	39	3	3	1	2.29	30	2	1	423	34.6	32.04	13.2022	0.008	0.034	0.033	0.749	0.112	0.018	0.292	0.23	1.476
88132	1	42	3	5	3	2.37	44.3	2	2	233	33.8	23.41	9.95301	0.008	0.034	0.017	0.028	0.112	0.018	0.036	0.024	0.277
88133	1	34	4	3	5	1.32	27.7	1	1	486	19.6	20.46	23.7537	0.172	0.034	0.503	0.097	0.686	0.106	1.11	0.437	3.145
88134	1	80	3	4	1	3.14	24.9	2	1	163	19.3	21.74	7.4977	0.008	0.034	0.047	0.069	0.112	0.018	0.253	0.172	0.713
88144	1	68	4	3	3	0.97	41.7	1	1	235	30.8	44.59	5.27024	0.008	0.034	0.017	0.67	0.112	0.018	0.053	0.034	0.946
88146	1	45	3	5	1	2.4558	26.8	1	1	398	14.7	32.46	12.2612	0.008	0.034	0.017	0.087	0.112	0.018	0.018	0.024	0.318
88151	1	67	1	1	1	0.74	32	1	1	133	19.3	20.22	6.57765	0.008	0.034	0.017	0.028	0.112	0.018	0.035	0.035	0.287
88154	1	25	3	4	6	0.17	21.8	1	1	462	9.68	67.67	6.82725	0.103	0.034	0.167	0.028	0.112	0.053	1.5	1.28	3.277
88156	1	28	3	4	1	2.49	17.1	2	1	428	16.1	64.25	6.66148	0.008	0.034	0.067	0.028	0.112	0.018	0.104	0.053	0.424
88169	1	29	1	4	6	3.14	27.5	2	1	213	11.3	14.31	14.8847	0.008	0.034	0.017	0.028	0.112	0.018	0.045	0.362	0.624
88170	1	80	3	3	1	2.4558	26.9	2	1	318	23.9	43.38	7.33057	0.008	0.034	0.029	0.028	0.112	0.018	0.064	0.051	0.344
88173	1	64	3	2	3	0.67	24.3	1	1	509	19.9	55.38	9.19104	0.047	0.034	0.059	0.327	0.112	0.018	0.236	0.114	0.947
88175	1	68	5	3	1	1.9	27.2	1	1	388	25.1	44.3	8.75847	0.008	0.034	0.017	0.028	0.112	0.018	0.034	0.024	0.275
88178	1	29	2	2	1	2.3	27.9	1	1	354	22.3	19.15	18.4856	0.008	0.034	0.017	3.09	0.112	0.018	0.178	0.172	3.629
88188	1	51	2	1	1	0.83	28.8	2	1	447	25.1	53.98	8.28084	0.008	0.034	0.028	0.048	0.112	0.018	0.033	0.024	0.305
88192	1	20	2	2	6	1.49	32.1	1	1	210	14.4	9.76	21.5164	0.008	0.034	0.017	1.66	0.112	0.018	0.323	0.772	2.944
88194	1	80	4	4	1	2.4558	24.2	1	1	268	19.1	70.28	3.81332	0.148	0.034	0.169	0.028	0.112	0.083	0.453	0.169	1.196
88198	1	63	1	1	3	0.63	31.9	1	2	568	33.1	79.31	7.16177	0.072	0.034	0.219	0.237	0.112	0.073	0.527	0.163	1.437
88200	1	28	4	4	6	1.1	42.6	1	1	309	41.4	19.36	15.9607	0.031	0.118	0.197	0.326	0.112	0.03	0.401	0.143	1.358
88203	1	64	1	3	1	1.07	36.3	2	1	481	28.4	43.23	11.1265	0.008	0.034	0.024	0.028	0.112	0.018	0.048	0.046	0.318
88208	1	71	2	5	4	4.21	29.4	1	1	311	18.3	37.38	8.31996	0.008	0.034	0.017	0.062	0.112	0.018	0.059	0.024	0.334
88210	1	36	1	4	1	3.2	34	1	1	423	23.3	29.59	14.2954	0.053	0.034	0.111	0.028	0.4074	0.026	0.321	0.14	1.1204
88218	1	54	3	4	6	5	34.2	2	1	246	31.4	43.88	5.6062	0.008	0.034	0.027	0.028	0.112	0.018	0.136	0.114	0.477
88222	1	44	3	3	5	1.09	24.3	1	1	581	29.7	54.83	10.5964	0.152	0.034	0.301	0.094	0.112	0.112	0.709	0.226	1.74
88224	1	48	3	4	1	3.52	33.5	1	1	220	13.5	18.1	12.1547	0.008	0.034	0.08	0.028	0.112	0.018	1.14	0.13	1.55
88229	1	80	3	3	1	2.09	28.7	1	2	195	21.7	49.72	3.92196	0.008	0.034	0.017	0.028	0.112	0.018	0.092	0.075	0.384
88232	1	65	4	4	1	2.4558	28.8	2	1	244	21.9	34.98	6.97541	0.008	0.034	0.058	0.028	0.112	0.018	0.018	0.024	0.3
88233	1	51	5	2	1	1.32	18.3	1	2	1150	39	121.9	9.43396	0.273	0.034	0.187	0.028	0.112	0.079	0.535	0.257	1.505
88253	1	61	4	3	5	0.8	23.8	1	1	790	19	148.1	5.33423	0.264	0.034	0.379	0.028	0.112	0.153	1.13	0.452	2.552
88267	1	26	5	5	5	1.64	28.8	2	1	442	30.2	19.65	22.4936	0.008	0.034	0.017	0.062	0.4074	0.018	0.018	0.024	0.5884
88287	1	60	4	3	6	0.02	22.5	1	1	476	16.6	73.96	6.43591	0.041	0.034	0.293	2.58	0.112	0.018	0.319	0.111	3.508
88303	1	65	5	5	1	2.81	33.2	1	1	272	28	44.43	6.12199	0.016	0.034	0.332	0.028	0.112	0.018	0.183	0.075	0.798
88306	1	41	2	2	1	2.4558	29.3	2	1	544	26.9	41.58	13.0832	0.008	0.242	0.017	0.322	0.112	0.018	0.194	0.113	1.026
88310	1	23	2	5	5	0.85	35.9	2	1	358	38.4	28.64	12.5	0.008	0.034	0.017	0.028	0.112	0.018	0.074	0.039	0.33
88317	1	29	5	4	6	1.68	25.9	1	1	481	15.6	37.34	12.8816	0.008	0.05	0.017	0.028	0.112	0.018	0.043	0.024	0.3
88322	1	60	4	3	1	3.67	22.3	2	1	204	20.1	27.3	7.47253	0.008	0.034	0.029	0.028	0.112	0.018	0.247	0.191	0.667
88330	1	62	2	1	6	0.37	20.6	1	1	260	13.1	56.44	4.60666	0.183	0.319	0.362	0.028	0.112	0.129	0.898	0.409	2.44
88337	1	49	5	3	1	1.96	29.3	1	2	354	15.1	27.39	12.9244	0.008	0.034	0.024	4.21	0.112	0.018	0.206	0.124	4.736
88338	1	70	3	4	1	5	29	1	1	352	11.3	25.51	13.7985	0.008	0.034	0.069	0.028	0.112	0.018	0.205	0.108	0.582
88342	1	45	2	1	1	1.65	27.8	1	2	517	14.1	79.6	6.49497	0.142	0.034	0.177	0.028	0.112	0.062	0.55	0.267	1.372
88343	1	35	1	5	1	3.91	29.2	2	1	107	8.57	23.18	4.61605	0.008	0.034	0.017	0.2	0.112	0.018	0.054	0.043	0.486
88346	1	74	3	4	1	3.14	30.5	1	1	294	24.7	56.54	5.19986	0.008	0.103	0.017	0.028	0.112	0.018	11.5	0.058	11.844
88350	1	45	4	3	6	5	33.1	2	1	494	31.7	56.45	8.75111	0.008	0.034	0.017	1.23	0.112	0.018	0.06	0.024	1.503
88353	1	34	1	1	6	0.62	26	2	1	781	33.4	38.99	20.0308	0.008	0.034	0.017	0.141	0.112	0.018	0.09	0.075	0.495
88365	1	36	2	4	5	0.42	33.4	1	1	197	18.7	32.27	6.10474	0.183	0.034	0.1012	6.25	0.112	0.093	0.633	0.577	7.9832
88370	1	34	3	3	5	0.93	26.7	1	1	374	17.5	40.07	9.33367	0.063	0.034	0.099	0.028	0.112	0.034	0.267	0.11	0.747
88388	1	55	3	5	3	2.76	28	2	1	386	27.3	23.89	16.1574	0.008	0.034	0.017	0.028	0.112	0.018	0.079	0.04	0.336
88413	1	62	2	1	3	0.85	27.4	2	1	357	36.9	50.31	7.096	0.008	0.034	0.017	0.171	0.346	0.018	0.039	0.037	0.67
88417	1	59	5	5	5	3.23	22.2	2	2	455	25.3	37.14	12.2509	0.008	0.034	0.05	0.028	0.112	0.018	0.146	0.082	0.478
88422	1	62	2	4	3	1.94	38.5	2	2	301	32.8	23.62	12.7434	0.008	0.034	0.017	0.028	0.112	0.018	0.138	0.024	0.379
88425	1	45	3	3	1	4.94	30.4	1	1	351	17.2	42.36	8.28612	0.184	0.034	0.236	0.028	0.112	0.106	0.602	0.243	1.545
88426	1	66	2	5	1	5	23.9	1	2	471	16.4	38.94	12.0955	0.035	0.067	0.09	1.53	0.112	0.018	0.144	0.073	2.069
88427	1	30	1	2	1	2.11	28	1	1	233	15	12.16	19.1612	0.008	0.034	0.017	0.303	0.112	0.018	0.047	0.024	0.563
88428	1	47	3	2	1	1.54	22.5	1	1	333	17.4	72.81	4.57355	0.147	0.034	0.384	0.028	0.112	0.15	1.06	0.403	2.318
88429	1	51	2	4	1	3.16	29.5	1	1	542	22.8	41.57	13.0382	0.097	0.034	0.262	0.028	0.112	0.09	0.565	0.151	1.339
88438	1	61	3	5	1	5	27.3	2	2	315	21.4	46.32	6.80052	0.008	0.034	0.017	0.028	0.112	0.018	0.089	0.108	0.414
88450	1	49	5	3	1	2.06	25.6	1	1	278	31.7	46.31	6.00302	0.008	0.034	0.027	0.057	0.112	0.018	0.05	0.024	0.33
88459	1	38	1	1	6	1.23	30.1	2	2	798	24.7	64.62	12.3491	0.008	0.034	0.044	0.15	0.112	0.018	0.073	0.043	0.482
88461	1	27	5	5	6	2.1	29.3	2	1	440	30.3	22.23	19.7931	0.008	0.034	0.017	0.094	0.112	0.018	0.077	0.088	0.448
88464	1	38	4	5	5	5	36.8	2	1	47.1	27.5	10.51	4.48145	0.017	0.034	0.034	0.028	0.112	0.018	0.163	0.109	0.515
88477	1	47	1	4	1	2.33	22.4	2	1	976	21.8	149.5	6.52843	0.008	0.034	0.017	0.028	0.112	0.018	0.052	0.038	0.307
88501	1	31	2	4	1	1.58	29.8	1	1	327	29.5	12.28	26.6287	0.008	0.034	0.017	0.5	0.112	0.018	0.05	0.024	0.763
88515	1	54	3	3	6	5	29	1	1	215	22.2	42.61	5.04576	0.16	0.034	0.199	0.574	0.112	0.053	0.648	0.237	2.017
88516	1	71	5	5	1	4.37	20.9	1	2	388	21.6	98.21	3.95072	0.008	0.034	0.039	0.028	0.112	0.018	0.242	0.164	0.645
88524	1	24	5	4	1	1.11	16.2	2	1	757	31.9	38.96	19.4302	0.013	0.034	0.171	0.028	0.112	0.018	0.283	0.154	0.813
88537	1	45	4	2	5	3.12	26.5	2	1	418	22.1	37.23	11.2275	0.011	0.034	0.036	3.2	20.5	0.018	0.08	0.058	23.937
88544	1	67	3	3	1	2.09	40.2	2	1	238	30.7	37.81	6.29463	0.008	0.077	0.017	0.053	0.112	0.018	0.074	0.024	0.383
88556	1	80	3	5	3	4.71	22.5	2	1	308	17.6	80.31	3.83514	0.008	0.034	0.017	0.058	0.112	0.018	0.055	0.024	0.326
88561	1	45	3	2	1	0.87	53.1	1	1	126	24.9	14.62	8.61833	0.096	0.034	0.224	0.028	0.112	0.097	0.451	0.267	1.309
88574	1	29	3	5	6	5	31.5	1	1	365	18.2	17.67	20.6565	0.008	0.034	0.024	0.053	0.112	0.018	0.089	0.129	0.467
88576	1	33	4	4	1	2.57	32	2	1	274	43.4	8.04	34.0796	0.008	0.034	0.1012	0.498	0.112	0.018	0.21	0.034	1.0152
88584	1	57	4	3	1	0.6	25.7	2	2	699	25.8	71.52	9.77349	0.008	0.034	0.017	1.86	0.112	0.018	0.028	0.024	2.101
88585	1	48	2	2	6	0.63	27.8	1	1	296	11.1	21.42	13.8189	0.026	0.034	0.04	0.028	0.112	0.018	0.165	0.098	0.521
88592	1	41	5	5	1	5	49.4	1	1	214	34.9	15.65	13.6741	0.008	0.034	0.017	0.46	0.112	0.018	0.065	0.024	0.738
88598	1	75	3	4	2	1.43	25.3	1	1	515	44.8	83.73	6.15072	0.329	0.034	0.395	0.028	0.112	0.194	1.01	0.323	2.425
88599	1	80	3	4	3	1.02	27	2	2	1.72	2.114	118.5	0.0145148	0.008	0.034	0.017	0.054	0.112	0.018	0.092	0.102	0.437
88600	1	59	5	4	3	0	27.4	1	1	389	16.3	58.56	6.64276	0.023	0.034	0.085	0.028	0.112	0.018	0.128	0.068	0.496
88602	1	23	5	4	5	2.97	31.8	1	2	349	40.4	15.11	23.0973	0.089	0.034	0.147	0.028	0.112	0.052	0.34	0.115	0.917
88604	1	38	2	5	1	0	33.4	2	1	449	31.8	27.83	16.1337	0.008	0.034	0.017	0.028	0.112	0.018	0.219	0.024	0.46
88609	1	67	1	4	1	2.51	29	1	1	446	16.4	61.36	7.26858	0.008	0.034	0.017	0.476	0.112	0.018	0.5	0.071	1.236
88630	1	32	3	5	5	5	21	2	1	886	33.4	58.13	15.2417	0.008	0.034	0.036	0.028	0.112	0.018	0.061	0.024	0.321
88633	1	30	5	5	1	2.4558	27.8	2	2	335	28.2	24.7	13.5628	0.008	0.034	0.017	0.232	0.112	0.018	0.053	0.024	0.498
88643	1	33	3	4	1	5	23.4	2	1	485	15	55.07	8.80697	0.008	0.034	0.017	0.028	0.112	0.018	0.099	0.08	0.396
88655	1	41	4	4	1	4.32	40.2	2	2	322	20.9	14.78	21.7862	0.008	0.034	0.017	0.928	0.112	0.018	0.053	0.045	1.215
88659	1	63	4	5	2	2.29	34.7	1	1	183	26.2	26.48	6.91088	0.096	0.034	0.135	0.224	0.112	0.041	0.396	0.169	1.207
88661	1	40	3	5	1	4.12	29.6	2	1	306	25.9	34.46	8.87986	0.008	0.034	0.025	0.08	0.259	0.018	0.077	0.053	0.554
88664	1	51	5	1	1	0.92	19	2	2	421	27.4	46.58	9.03821	0.008	0.034	0.017	0.028	0.112	0.018	0.036	0.024	0.277
88678	1	75	4	3	4	2.61	26.3	2	2	320	19.9	67.23	4.75978	0.008	0.034	0.052	0.085	0.112	0.018	0.186	0.076	0.571
88692	1	71	3	4	1	5	33.9	1	1	439	22.5	56.94	7.70987	0.008	0.034	0.017	0.382	0.112	0.018	0.087	0.024	0.682
88731	1	50	2	4	1	0.76	19.6	1	1	483	12.4	68.71	7.02954	0.141	0.065	0.286	0.086	0.112	0.099	1.57	0.334	2.693
88740	1	66	3	5	3	5	35.8	2	1	436	48.7	49.17	8.8672	0.008	0.15	0.017	0.028	0.112	0.018	0.081	0.024	0.438
88741	1	55	5	5	1	5	24.3	2	2	467	24.9	40.54	11.5195	0.008	0.034	0.024	0.028	0.112	0.018	0.042	0.056	0.322
88742	1	24	3	3	5	2.56	16.9	2	1	517	22.7	48.15	10.7373	0.008	0.034	0.017	0.028	0.112	0.018	0.179	0.056	0.452
88743	1	65	5	5	1	5	23.9	2	1	260	18.7	22.31	11.654	0.008	0.034	0.017	1.32	0.112	0.018	0.065	0.053	1.627
88755	1	37	1	4	1	2.06	34.5	1	1	203	27.9	11.68	17.3801	0.008	0.034	0.047	0.028	0.112	0.018	0.062	0.038	0.347
88770	1	53	3	5	1	5	32.2	2	1	320	24.4	49.47	6.46857	0.008	0.034	0.017	0.028	0.112	0.018	0.132	0.162	0.511
88775	1	45	5	3	4	1.26	22.1	1	1	687	15.2	22.27	30.8487	0.014	0.034	0.024	0.124	0.112	0.018	0.122	0.055	0.503
88780	1	69	4	3	1	5	28.5	1	1	258	24.7	36.64	7.04148	0.008	0.034	0.024	0.045	0.112	0.018	0.056	0.037	0.334
88791	1	66	2	5	1	4.98	37.5	1	1	248	26	43.27	5.73145	0.008	0.034	0.036	0.062	0.112	0.018	0.04	0.024	0.334
88793	1	21	4	4	5	2.4558	18.5	1	2	768	37.8	51.36	14.9533	0.123	0.034	0.212	0.194	0.112	0.073	0.544	0.287	1.579
88804	1	55	3	3	1	2.73	26.7	1	1	473	12.7	83.02	5.69742	0.008	0.034	0.029	0.202	0.112	0.018	0.09	0.594	1.087
88805	1	30	3	5	1	5	26.8	2	1	384	21.2	25.85	14.8549	0.008	0.034	0.017	0.028	0.112	0.018	0.072	0.024	0.313
88806	1	66	2	4	5	4.21	29.4	1	2	214	15	29.58	7.23462	0.12	0.034	0.158	0.028	0.112	0.049	0.458	0.197	1.156
88814	1	30	1	5	1	2.99	24.3	2	1	469	20.4	24.75	18.9495	0.008	0.034	0.024	0.028	0.112	0.018	0.099	0.08	0.403
88827	1	67	5	4	1	1.93	22.3	2	1	368	19.2	41	8.97561	0.008	0.034	0.017	0.046	0.112	0.018	0.036	0.024	0.295
88841	1	38	1	1	1	2.4558	30.3	2	1	199	17.2	14.11	14.1035	0.008	0.115	0.017	0.776	0.112	0.018	0.122	0.062	1.23
88846	1	32	3	3	5	2.4558	30	1	2	505	31.5	33.75	14.963	0.347	0.034	0.625	0.028	5.28	0.121	1.24	0.377	8.052
88855	1	64	1	1	1	1.65	23.2	2	2	280	13.6	61.4	4.56026	0.008	0.034	0.017	0.028	0.112	0.018	0.048	0.034	0.299
88859	1	50	3	4	4	1.27	33.2	2	1	684	54.3	70.68	9.67742	0.008	0.034	0.04	0.028	0.112	0.018	0.029	0.024	0.293
88864	1	53	4	5	1	1.77	36.1	1	2	254	24	35.21	7.21386	0.008	0.034	0.017	2	0.112	0.018	0.09	0.038	2.317
88877	1	53	2	1	6	0.62	28.7	1	1	346	19.1	20.98	16.4919	0.008	0.034	0.017	0.028	0.112	0.018	0.079	0.024	0.32
88883	1	72	3	5	1	5	27.5	2	1	371	27.2	66.69	5.56305	0.008	0.034	0.1012	0.028	0.112	0.018	0.101	0.024	0.4262
88884	1	24	5	4	5	2.99	29.4	1	2	368	20.8	22.12	16.6365	0.057	0.034	0.086	0.081	0.112	0.031	0.111	0.054	0.566
88885	1	54	2	3	1	2.4558	36.6	1	1	292	31.2	31.45	9.28458	0.008	0.034	0.017	0.028	0.112	0.018	0.081	0.056	0.354
88894	1	21	4	2	5	2.4558	23.3	1	1	868	30.1	66.89	12.9765	0.023	0.034	0.119	0.028	0.112	0.018	0.366	0.218	0.918
88896	1	23	3	5	5	2.53	19.4	1	1	688	34.3	44.3	15.5305	0.034	0.034	0.054	0.028	0.112	0.018	0.183	0.078	0.541
[truncated: 642 more rows]
